# Supplementary material
Source: HighWire-hosted journal article supplement (https://erj.ersjournals.com/content/52/1/1800222)
Supplement: inline-supplementary-material-2 [file inline-supplementary-material-2.pdf]

## Appendix 2. References of all included studies

1. Agh T, Inotai A, Meszaros A. Factors associated with medication adherence in patients with chronic obstructive pulmonary disease. *Respiration; international review of thoracic diseases* 2011; 82(4): 328-334.
  2. Alcazar B, Garcia-Polo C, Herrejon A, Ruiz LA, de Miguel J, Ros JA, Garcia-Sidro P, Tirado Conde G, Lopez-Campos JL, Martinez C, Costan J, Bonnin M, Mayoralas S, Miravittles M. Factors associated with hospital admission for exacerbation of chronic obstructive pulmonary disease. [Spanish]
- Factores asociados a la hospitalizacion por exacerbacion de la enfermedad pulmonar obstructiva cronica. *Archivos de Bronconeumologia* 2012; 48(3): 70-76.
3. Allen-Ramey FC, Gupta S, DiBonaventura MD. Patient characteristics, treatment patterns, and health outcomes among COPD phenotypes. *International journal of chronic obstructive pulmonary disease* 2012; 7: 779-787.
  4. Antoniu SA, Puiu A, Zaharia B, Azoicai D. Health status during hospitalisations for chronic obstructive pulmonary disease exacerbations: The validity of the Clinical COPD Questionnaire. *Expert Review of Pharmacoeconomics and Outcomes Research* 2014; 14(2): 283-287.
  5. Arne M, Janson C, Janson S, Boman G, Lindqvist U, Berne C, Emtner M. Physical activity and quality of life in subjects with chronic disease: chronic obstructive pulmonary disease compared with rheumatoid arthritis and diabetes mellitus. *Scandinavian journal of primary health care* 2009; 27(3): 141-147.
  6. Berkus J, Engerstrom L, Orwelius L, Nordlund P, Sjoberg F, Fredrikson M, Walther SM. A prospective longitudinal multicentre study of health related quality of life in ICU survivors with COPD. *Critical care (London, England)* 2013; 17(5): R211.
  7. Boland MR, van Boven JF, Kruis AL, Chavannes NH, van der Molen T, Goossens LM, Rutten-van Molken MP. Investigating the association between medication adherence and health-related quality of life in COPD: Methodological challenges when using a proxy measure of adherence. *Respir Med* 2016; 110: 34-45.
  8. Boland MRS, Tsiachristas A, Kruis AL, Chavannes NH, Rutten-van Molken MPMH. Are GOLD ABCD groups better associated with health status and costs than GOLD 1234 grades? A cross-sectional study. *Primary Care Respiratory Journal* 2014; 23(1): 30-37.
  9. Boland MRS, van Boven JFM, Kocks JWH, van der Molen T, Goossens LM, Chavannes NH, Rutten-van Molken MPMH. Mapping the Clinical Chronic Obstructive Pulmonary Disease Questionnaire onto Generic Preference-Based EQ-5D Values. *Value in Health (Wiley-Blackwell)* 2015; 18(2): 299-307.
  10. Borge CR, Moum T, Puline Lein M, Austegard EL, Wahl AK. Illness perception in people with chronic obstructive pulmonary disease. [References]. *Scandinavian Journal of Psychology*, 2014; pp. 456-463.
  11. Boros PW, Lubinski W. Health state and the quality of life in patients with chronic obstructive pulmonary disease in Poland: a study using the EuroQoL-5D questionnaire. *Polskie Archiwum Medycyny Wewnetrznej* 2012; 122(3): 73-81.
  12. Bourbeau J, Ford G, Zackon H, Pinsky N, Lee J, Ruberto G. Impact on patients' health status following early identification of a COPD exacerbation. *European Respiratory Journal* 2007; 30(5): 907-913.

13. Braidó F, Baiardini I, Molinengo G, Garuti S, Ferrari M, Mantero M, Blasi F, Canonica GW. Choose your outcomes: From the mean to the personalized assessment of outcomes in COPD. An exploratory pragmatic survey. *European journal of internal medicine* 2016; 34: 85-88.
14. Bratas O, Espnes GA, Rannestad T, Walstad R. Characteristics of patients with chronic obstructive pulmonary disease choosing rehabilitation. *Journal of rehabilitation medicine* 2010; 42(4): 362-367.
15. Brophy C, Kastelik JA, Gardiner E, Greenstone MA. Quality of life measurements and bronchodilator responsiveness in prescribing nebulizer therapy in COPD. *Chronic Respiratory Disease* 2008; 5(1): 13-18.
16. Bulcun E, Ekici M, Ekici A. Assessment of patients' preferences regarding the characteristics associated with the treatment of chronic obstructive pulmonary disease. *International journal of chronic obstructive pulmonary disease* 2014; 9: 363-368.
17. Burns DK, Wilson EC, Browne P, Olive S, Clark A, Galey P, Dix E, Woodhouse H, Robinson S, Wilson A. The Cost Effectiveness of Maintenance Schedules Following Pulmonary Rehabilitation in Patients with Chronic Obstructive Pulmonary Disease: An Economic Evaluation Alongside a Randomised Controlled Trial. *Applied health economics and health policy* 2016; 14(1): 105-115.
18. Carlucci A, Vitacca M, Malovini A, Pierucci P, Guerrieri A, Barbano L, Ceriana P, Balestrino A, Santoro C, Pisani L, Corcione N, Nava S. End-of-Life Discussion, Patient Understanding and Determinants of Preferences in Very Severe COPD Patients: A Multicentric Study. *Copd* 2016; 13(5): 632-638.
19. Chakrabarti B, Sulaiman MI, Davies L, Calverley PMA, Warburton CJ, Angus RM. A study of patient attitudes in the United Kingdom toward ventilatory support in chronic obstructive pulmonary disease. *Journal of Palliative Medicine* 2009; 12(11): 1029-1035.
20. Chapman KR, Fogarty CM, Peckitt C, Lassen C, Jadayel D, Dederichs J, Dalvi M, Kramer B. Delivery characteristics and patients' handling of two single-dose dry-powder inhalers used in COPD. *International journal of chronic obstructive pulmonary disease* 2011; 6: 353-363.
21. Chapman KR, Love L, Brubaker H. A comparison of breath-actuated and conventional metered-dose inhaler inhalation techniques in elderly subjects. *Chest* 1993; 104(5): 1332-1337.
22. Chen J, Wong CKH, S MM, Pang PKP, Yu WC. A comparison between the EQ-5D and the SF-6D in patients with chronic obstructive pulmonary disease (COPD). *PloS one* 2014; 9(11).
23. Chen YT, Ying YH, Chang K, Hsieh YH. Study of Patients' Willingness to Pay for a Cure of Chronic Obstructive Pulmonary Disease in Taiwan. *International journal of environmental research and public health* 2016; 13(3).
24. Chia-Wen C, Jeng-Yuan H, Zen-Gun W, Shiah-Lian C. Factors Associated With Willingness to Accept Palliative Care in Patients With Chronic Obstructive Pulmonary Disease. *Journal of Hospice & Palliative Nursing* 2017; 19(2): 147-153.
25. Chrystyn H, Small M, Milligan G, Higgins V, Gil EG, Estruch J. Impact of patients' satisfaction with their inhalers on treatment compliance and health status in COPD. *Respir Med* 2014; 108(2): 358-365.
26. Claessens MT, Lynn J, Zhong Z, Desbiens NA, Phillips RS, Wu AW, Harrell FE, Jr., Connors AF, Jr. Dying with lung cancer or chronic obstructive pulmonary disease: insights from SUPPORT. Study to Understand Prognoses and Preferences for Outcomes and Risks of Treatments. *Journal of the American Geriatrics Society* 2000; 48(5 Suppl): S146-153.

27. Cleland JA, Lee AJ, Hall S. Associations of depression and anxiety with gender, age, health-related quality of life and symptoms in primary care COPD patients. [References]. *Family Practice* 2007; 24(3): 217-223.
28. Collado-Mateo D, Adsuar JC, Olivares PR, Garcia-Gordillo MA. Health-related quality of life in Chilean patients with chronic obstructive pulmonary disease. [Spanish]. *Revista medica de Chile* 2017; 145(2): 147-155.
29. Cross J, Elender F, Barton G, Clark A, Shepstone L, Blyth A, Bachmann M, Harvey I. A randomised controlled equivalence trial to determine the effectiveness and cost-utility of manual chest physiotherapy techniques in the management of exacerbations of chronic obstructive pulmonary disease (MATREX). *Health technology assessment (Winchester, England)* 2010; 14(23): 1-147, iii-iv.
30. Dacosta Dibonaventura M, Paulose-Ram R, Su J, McDonald M, Zou KH, Wagner JS, Shah H. The impact of COPD on quality of life, productivity loss, and resource use among the elderly united states workforce. *COPD: Journal of Chronic Obstructive Pulmonary Disease* 2012; 9(1): 46-57.
31. Dal Negro RW, Povero M. Acceptability and preference of three inhalation devices assessed by the Handling Questionnaire in asthma and COPD patients. *Multidisciplinary respiratory medicine* 2015; 11: 7.
32. Dales RE, O'Connor A, Hebert P, Sullivan K, McKim D, Llewellyn-Thomas H. Intubation and mechanical ventilation for COPD: development of an instrument to elicit patient preferences. *Chest* 1999; 116(3): 792-800.
33. Decramer M, Dekhuijzen PN, Troosters T, van Herwaarden C, Rutten-van Molken M, van Schayck CP, Olivieri D, Lankhorst I, Ardia A. The Bronchitis Randomized On NAC Cost-Utility Study (BRONCUS): hypothesis and design. BRONCUS-trial Committee. *The European respiratory journal* 2001; 17(3): 329-336.
34. Dibonaventura MD, Paulose-Ram R, Su J, McDonald M, Zou KH, Wagner JS, Shah H. The burden of chronic obstructive pulmonary disease among employed adults. *International Journal of COPD* 2012; 7: 211-219.
35. Ding B, DiBonaventura M, Karlsson N, Bergstrom G, Holmgren U. A cross-sectional assessment of the burden of COPD symptoms in the US and Europe using the National Health and Wellness Survey. *International journal of chronic obstructive pulmonary disease* 2017; 12: 529-539.
36. Donate-Martinez A, Rodenas F, Garces J. Impact of a primary-based telemonitoring programme in HRQOL, satisfaction and usefulness in a sample of older adults with chronic diseases in Valencia (Spain). *Archives of Gerontology and Geriatrics* 2016; 62: 169-175.
37. Downey L, Au DH, Curtis JR, Engelberg RA. Life-sustaining treatment preferences: matches and mismatches between patients' preferences and clinicians' perceptions. *Journal of pain and symptom management* 2013; 46(1): 9-19.
38. Downey L, Engelberg RA, Curtis JR, Lafferty WE, Patrick DL. Shared priorities for the end-of-life period. [References]. *Journal of Pain and Symptom Management* 2009; 37(2): 175-188.
39. Dowson CA, Town GI, Frampton C, Mulder RT. Psychopathology and illness beliefs influence COPD self-management. [References]. *Journal of Psychosomatic Research* 2004; 56(3): 333-340.
40. Eakin EG, Glasgow RE. The Patients' Perspective on the Self-management of Chronic Obstructive Pulmonary Disease. *Journal of health psychology* 1997; 2(2): 245-253.

41. Egan C, Deering BM, Blake C, Fullen BM, McCormack NM, Spruit MA, Costello RW. Short term and long term effects of pulmonary rehabilitation on physical activity in COPD. *Respir Med* 2012; 106(12): 1671-1679.
42. Eskander A, Waddell TK, Faughnan ME, Chowdhury N, Singer LG. BODE index and quality of life in advanced chronic obstructive pulmonary disease before and after lung transplantation. *The Journal of heart and lung transplantation : the official publication of the International Society for Heart Transplantation* 2011; 30(12): 1334-1341.
43. Farmer A, Williams V, Velardo C, Shah SA, Yu LM, Rutter H, Jones L, Williams N, Heneghan C, Price J, Hardinge M, Tarassenko L. Self-Management Support Using a Digital Health System Compared With Usual Care for Chronic Obstructive Pulmonary Disease: Randomized Controlled Trial. *Journal of medical Internet research* 2017; 19(5): e144.
44. Ferreira LN, Ferreira PL, Pereira LN. Comparing the performance of the SF-6D and the EQ-5D in different patient groups. *Acta medica portuguesa* 2014; 27(2): 236-245.
45. Fishwick D, Lewis L, Darby A, Young C, Wiggans R, Waterhouse J, Wight J, Blanc PD. Determinants of health-related quality of life among residents with and without COPD in a historically industrialised area. *International archives of occupational and environmental health* 2014.
46. Fletcher MJ, Upton J, Taylor-Fishwick J, Buist SA, Jenkins C, Hutton J, Barnes N, Van Der Molen T, Walsh JW, Jones P, Walker S. COPD uncovered: an international survey on the impact of chronic obstructive pulmonary disease [COPD] on a working age population. *BMC public health* 2011; 11: 612.
47. Fox E, Landrum-McNiff K, Zhong Z, Dawson NV, Wu AW, Lynn J. Evaluation of prognostic criteria for determining hospice eligibility in patients with advanced lung, heart, or liver disease. SUPPORT Investigators. Study to Understand Prognoses and Preferences for Outcomes and Risks of Treatments. *JAMA : the journal of the American Medical Association* 1999; 282(17): 1638-1645.
48. Fried TR, Bradley EH, Towle VR, Allore H. Understanding the treatment preferences of seriously ill patients. *The New England journal of medicine* 2002; 346(14): 1061-1066.
49. Fried TR, O'Leary J, Van Ness P, Fraenkel L. Inconsistency over time in the preferences of older persons with advanced illness for life-sustaining treatment. [References]. *Journal of the American Geriatrics Society* 2007; 55(7): 1007-1014.
50. Gaber KA, Barnett M, Planchant Y, McGavin CR. Attitudes of 100 patients with chronic obstructive pulmonary disease to artificial ventilation and cardiopulmonary resuscitation. *Palliative medicine* 2004; 18(7): 626-629.
51. Galaznik A, Chapnick J, Vietri J, Tripathi S, Zou KH, Makinson G. Burden of smoking on quality of life in patients with chronic obstructive pulmonary disease. *Expert review of pharmacoeconomics & outcomes research* 2013; 13(6): 853-860.
52. Garcia-Gordillo MA, Collado-Mateo D, Olivares PR, Adsuar JC, Merellano-Navarro E. A Cross-sectional Assessment of Health-related Quality of Life among Patients with Chronic Obstructive Pulmonary Disease. *Iranian journal of public health* 2017; 46(8): 1046-1053.
53. Garcia-Polo C, Alcazar-Navarrete B, Ruiz-Iturriaga LA, Herrejon A, Ros-Lucas JA, Garcia-Sidro P, Tirado-Conde G, Lopez-Campos JL, Martinez-Rivera C, Costan-Galicia J, Mayoralas-Alises S, De Miguel-Diez J, Miravittles M. Factors associated with high healthcare resource utilisation among COPD patients. *Respir Med* 2012; 106(12): 1734-1742.
54. Gillespie P, O'Shea E, Casey D, Murphy K, Devane D, Cooney A, Mee L, Kirwan C, McCarthy B, Newell J. The cost-effectiveness of a structured education pulmonary rehabilitation

programme for chronic obstructive pulmonary disease in primary care: the PRINCE cluster randomised trial. *BMJ Open* 2013; 3(11): e003479.

55. Goossens LM, Nivens MC, Sachs P, Monz BU, Rutten-van Molken MP. Is the EQ-5D responsive to recovery from a moderate COPD exacerbation? *Respir Med* 2011; 105(8): 1195-1202.

56. Goossens LM, Utens CM, Smeenk FW, Donkers B, van Schayck OC, Rutten-van Molken MP. Should I stay or should I go home? A latent class analysis of a discrete choice experiment on hospital-at-home. *Value in health : the journal of the International Society for Pharmacoeconomics and Outcomes Research* 2014; 17(5): 588-596.

57. Gruenberger JB, Vietri J, Keininger DL, Mahler DA. Greater dyspnea is associated with lower health-related quality of life among European patients with COPD. *International journal of chronic obstructive pulmonary disease* 2017; 12: 937-944.

58. Guyatt GH, King DR, Feeny DH, Stubbings D, Goldstein RS. Generic and specific measurement of health-related quality of life in a clinical trial of respiratory rehabilitation. *Journal of clinical epidemiology* 1999; 52(3): 187-192.

59. Gvozdenovic BS, Mitic S, Zugic VG, Gvozdenovic AT, Lazovic NM, Plavsic S. Relationship between degree of dyspnoea and health-related quality of life in patients with chronic obstructive pulmonary disease. [Croatian]. *Srpski arhiv za celokupno lekarstvo* 2007; 135(9-10): 547-553.

60. Hanada S, Wada S, Ohno T, Sawaguchi H, Muraki M, Tohda Y. Questionnaire on switching from the tiotropium handihaler to the respimat inhaler in patients with chronic obstructive pulmonary disease: Changes in handling and preferences immediately and several years after the switch. *International Journal of COPD* 2015; 10: 69-77.

61. Hansen NCG, Evald T, Ibsen TB. Terbutaline inhalations by the Turbuhaler as replacement for domiciliary nebulizer therapy in severe chronic obstructive pulmonary disease. *Respir Med* 1994; 88(4): 267-271.

62. Hansen NCG, May O. Domiciliary nebulized terbutaline in severe chronic airways obstruction. *European Respiratory Journal* 1990; 3(4): 463-464.

63. Harper R, Brazier JE, Waterhouse JC, Walters SJ, Jones NM, Howard P. Comparison of outcome measures for patients with chronic obstructive pulmonary disease (COPD) in an outpatient setting. *Thorax* 1997; 52(10): 879-887.

64. Haughney J, Partridge MR, Vogelmeier C, Larsson T, Kessler R, Stahl E, Brice R, Lofdahl CG. Exacerbations of COPD: Quantifying the patient's perspective using discrete choice modelling. *European Respiratory Journal* 2005; 26(4): 623-629.

65. Hawken N, Torvinen S, Neine ME, Amri I, Toumi M, Aballea S, Plich A, Roche N. Patient preferences for dry powder inhaler attributes in asthma and chronic obstructive pulmonary disease in France: a discrete choice experiment. *BMC pulmonary medicine* 2017; 17(1): 99.

66. Hernandez P, Balter MS, Bourbeau J, Chan CK, Marciniuk DD, Walker SL. Canadian practice assessment in chronic obstructive pulmonary disease: respiratory specialist physician perception versus patient reality. *Canadian respiratory journal : journal of the Canadian Thoracic Society* 2013; 20(2): 97-105.

67. Heyworth IT, Hazell ML, Linehan MF, Frank TL. How do common chronic conditions affect health-related quality of life? *The British journal of general practice : the journal of the Royal College of General Practitioners* 2009; 59(568): e353-358.

68. Hohmeier KC, Masselink A. Patient preferences on participation in chronic obstructive pulmonary disease practice-based research in a community pharmacy setting. *Journal of Applied Pharmacy* 2016: 8 (2) (no pagination)(214).
69. Hong JY, Kim SY, Chung KS, Kim EY, Jung JY, Park MS, Kang YA, Kim SK, Chang J, Kim YS. Factors associated with the quality of life of Korean COPD patients as measured by the EQ-5D. *Qual Life Res* 2015: 24(10): 2549-2558.
70. Hoogendoorn M, van Wetering CR, Schols AM, Rutten-van Molken MP. Is INTERdisciplinary COMMunity-based COPD management (INTERCOM) cost-effective? *The European respiratory journal* 2010: 35(1): 79-87.
71. Hoyle CK, Tabberer M, Brooks J. Mapping the COPD Assessment Test onto EQ-5D. *Value in health : the journal of the International Society for Pharmacoeconomics and Outcomes Research* 2016: 19(4): 469-477.
72. Hwang YI, Kwon OJ, Kim YW, Kim YS, Park YB, Lee MG, Kim DG, Jang SH, Jung KS. Awareness and impact of COPD in Korea: An epidemiologic insight survey. *Tuberculosis and Respiratory Diseases* 2011: 71(6): 400-407.
73. Hyland ME, Halpin DM, Blake S, Seamark C, Pinnuck M, Ward D, Whalley B, Greaves CJ, Hawkins AL, Seamark D. Preference for different relaxation techniques by COPD patients: comparison between six techniques. *International journal of chronic obstructive pulmonary disease* 2016: 11: 2315-2319.
74. Jakobsen AS, Laursen LC, Rydahl-Hansen S, Ostergaard B, Gerds TA, Emme C, Schou L, Phanareth K. Home-based telehealth hospitalization for exacerbation of chronic obstructive pulmonary disease: findings from "the virtual hospital" trial. *Telemedicine journal and e-health : the official journal of the American Telemedicine Association* 2015: 21(5): 364-373.
75. Janssen DJ, Franssen FM, Wouters EF, Schols JM, Spruit MA. Impaired health status and care dependency in patients with advanced COPD or chronic heart failure. *Qual Life Res* 2011: 20(10): 1679-1688.
76. Janssen DJ, Spruit MA, Schols JM, Wouters EF. A call for high-quality advance care planning in outpatients with severe COPD or chronic heart failure. *Chest* 2011: 139(5): 1081-1088.
77. Janssen DJA, Curtis JR, Au DH, Spruit MA, Downey L, Schols JMGA, Wouters EFM, Engelberg RA. Patient-clinician communication about end-of-life care for Dutch and US patients with COPD. *European Respiratory Journal* 2011: 38(2): 268-276.
78. Janssen DJA, Schols JMGA, Wouters EFM, Spruit MA. One-Year Stability of Care Dependency in Patients With Advanced Chronic Organ Failure. *Journal of the American Medical Directors Association* 2014: 15(2): 127-132.
79. Jarvis S, Ind PW, Shiner RJ. Inhaled therapy in elderly COPD patients; time for re-evaluation? *Age and ageing* 2007: 36(2): 213-218.
80. Jia H, Lubetkin EI. Impact of nine chronic conditions for US adults aged 65 years and older: an application of a hybrid estimator of quality-adjusted life years throughout remainder of lifetime. *Quality of Life Research* 2016: 25(8): 1921-1929.
81. Jordan P, Quadrelli S, Heres M, Belli L, Ruhl N, Colt H. Examining patients' preferences for participation in clinical decision-making: the experience in a Latin American chronic obstructive pulmonary disease and cancer outpatient population. *Internal medicine journal* 2014: 44(3): 281-287.

82. Katajisto M, Kupiainen H, Rantanen P, Lindqvist A, Kilpelainen M, Tikkanen H, Laitinen T. Physical inactivity in COPD and increased patient perception of dyspnea. *International journal of chronic obstructive pulmonary disease* 2012; 7: 743-755.
83. Katula JA, Rejeski WJ, Wickley KL, Berry MJ. Perceived difficulty, importance, and satisfaction with physical function in COPD patients. *Health and quality of life outcomes* 2004; 2: 18.
84. Kawata AK, Kleinman L, Harding G, Ramachandran S. Evaluation of Patient Preference and Willingness to Pay for Attributes of Maintenance Medication for Chronic Obstructive Pulmonary Disease (COPD). *Patient* 2014.
85. Kessler R, Ståhl E, Vogelmeier C, Haughney J, Trudeau E, Löfdahl CG, Partridge MR. Patient Understanding, Detection, and Experience of COPD Exacerbations: An Observational, Interview-Based Study. *Chest* 2006; 130(1): 133-142.
86. Khdour MR, Agus AM, Kidney JC, Smyth BM, McElnay JC, Crealey GE. Cost-utility analysis of a pharmacy-led self-management programme for patients with COPD. *International journal of clinical pharmacy* 2011; 33(4): 665-673.
87. Kim J, Kim K. Gender differences in health-related quality of life of Korean patients with chronic obstructive lung disease. *Public health nursing (Boston, Mass)* 2015; 32(3): 191-200.
88. Kim SH, Oh YM, Jo MW. Health-related quality of life in chronic obstructive pulmonary disease patients in Korea. *Health and quality of life outcomes* 2014; 12: 57.
89. Koehorst-Ter Huurne K, Kort S, van der Palen J, van Beurden WJ, Movig KL, van der Valk P, Brusse-Keizer M. Quality of life and adherence to inhaled corticosteroids and tiotropium in COPD are related. *International journal of chronic obstructive pulmonary disease* 2016; 11: 1679-1688.
90. Kontodimopoulos N, Pappa E, Chadjiapostolou Z, Arvanitaki E, Papadopoulos AA, Niakas D. Comparing the sensitivity of EQ-5D, SF-6D and 15D utilities to the specific effect of diabetic complications. *European Journal of Health Economics* 2012; 13(1): 111-120.
91. Koskela J, Kilpelainen M, Kupiainen H, Mazur W, Sintonen H, Boezen M, Lindqvist A, Postma D, Laitinen T. Co-morbidities are the key nominators of the health related quality of life in mild and moderate COPD. *BMC pulmonary medicine* 2014; 14(1): 102.
92. Koskela J, Kupiainen H, Kilpelainen M, Lindqvist A, Sintonen H, Pitkaniemi J, Laitinen T. Longitudinal HRQoL shows divergent trends and identifies constant decliners in asthma and COPD. *Respir Med* 2014; 108(3): 463-471.
93. Kotz D, Huibers MJH, West RJ, Wesseling G, van Schayck OCP. What mediates the effect of confrontational counselling on smoking cessation in smokers with COPD? *Patient Education and Counseling* 2009; 76(1): 16-24.
94. Kruis AL, Boland MRS, Schoonvelde CH, Assendelft WJJ, Molken MPMHRV, Gussekloo J, Tsiachristas A, Chavannes NH. RECODE: Design and baseline results of a cluster randomized trial on cost-effectiveness of integrated COPD management in primary care. *BMC Pulmonary Medicine* 2013; 13(1).
95. Kuyucu T, Guclu SZ, Saylan B, Demir C, Senol T, Guner S, Koyuncu E, Ozen F, Ozturk S, Cangul Z, Aganoglu S, Ozkaya S, Ocak SC, Akkurt H, Intepe YS, Bayrak MG, Guler T, Bekci TT, Soyyigit S, Seyfettin S, Kula O, Akbay MO, Buyukgoze B, Asal G, Baslilar S, Ozturk O. A cross-sectional observational study to investigate daily symptom variability, effects of symptom on morning activities and therapeutic expectations of patients and physicians in COPD-SUNRISE study

KOAH'da semptomun günlük degiskenligini, sabah aktiviteleri uzerindeki etkisini ve hastalar ile fizik tedavi uzmanlari{dotless}ni{dotless}n terapeutik beklentilerini arasti{dotless}rmak icin yapi{dotless}lmi{dotless}s kesitsel bir gozlem cali{dotless}smasi{dotless}-SUNRISE cali{dotless}smasi{dotless}. *Tuberkuloz ve Toraks* 2011; 59(4): 328-339.

96. Kwon HY, Kim E. Factors contributing to quality of life in COPD patients in South Korea. *International journal of chronic obstructive pulmonary disease* 2016; 11: 103-109.

97. Lacasse Y, Bernard S, Martin S, Boivin M, Maltais F. Utility Scores In Patients With Oxygen-Dependent COPD: A Case-Control Study. *Copd* 2015; 12(5): 510-515.

98. Lemmens KM, Nieboer AP, Huijsman R. Designing patient-related interventions in COPD care: empirical test of a theoretical model. *Patient Educ Couns* 2008; 72(2): 223-231.

99. Lemmens KM, Nieboer AP, Rutten-Van Molken MP, van Schayck CP, Asin JD, Dirven JA, Huijsman R. Application of a theoretical model to evaluate COPD disease management. *BMC health services research* 2010; 10: 81.

100. Lewis KE, Annandale JA, Warm DL, Hurlin C, Lewis MJ, Lewis L. Home telemonitoring and quality of life in stable, optimised chronic obstructive pulmonary disease. *Journal of telemedicine and telecare* 2010; 16(5): 253-259.

101. Lin FJ, Pickard AS, Krishnan JA, Joo MJ, Au DH, Carson SS, Gillespie S, Henderson AG, Lindenauer PK, McBurnie MA, Mularski RA, Naureckas ET, Vollmer WM, Lee TA. Measuring health-related quality of life in chronic obstructive pulmonary disease: properties of the EQ-5D-5L and PROMIS-43 short form. *BMC medical research methodology* 2014; 14: 78.

102. Lynn J, Ely EW, Zhong Z, McNiff KL, Dawson NV, Connors A, Desbiens NA, Claessens M, McCarthy EP. Living and dying with chronic obstructive pulmonary disease. *Journal of the American Geriatrics Society* 2000; 48(5 Suppl): S91-100.

103. Mahler DA, Waterman LA, Ward J, Gifford AH. Comparison of dry powder versus nebulized beta-agonist in patients with COPD who have suboptimal peak inspiratory flow rate. *Journal of aerosol medicine and pulmonary drug delivery* 2014; 27(2): 103-109.

104. Manca S, Rodriguez E, Huerta A, Torres M, Lazaro L, Curi S, Pirina P, Miravittles M. Usefulness of the CAT, LCOPD, EQ-5D and COPDSS scales in understanding the impact of lung disease in patients with Alpha-1 antitrypsin deficiency. *COPD: Journal of Chronic Obstructive Pulmonary Disease* 2014; 11(5): 480-488.

105. Martinez CH, Raparla S, Plauschinat CA, Giardino ND, Rogers B, Beresford J, Bentkover JD, Schachtner-Appel A, Curtis JL, Martinez FJ, Han MK. Gender differences in symptoms and care delivery for chronic obstructive pulmonary disease. *Journal of women's health (2002)* 2012; 21(12): 1267-1274.

106. Martinez Rivera C, Costan Galicia J, Alcazar Navarrete B, Garcia-Polo C, Ruiz Iturriaga LA, Herrejon A, Ros Lucas JA, Garcia-Sidro P, Tirado-Conde G, Lopez-Campos JL, Mayoralas Alises S, de Miguel-Diez J, Esquinas C, Miravittles M. Factors Associated with Depression in COPD: A Multicenter Study. *Lung* 2016; 194(3): 335-343.

107. McDowell JE, McClean S, FitzGibbon F, Tate S. A randomised clinical trial of the effectiveness of home-based health care with telemonitoring in patients with COPD. *Journal of telemedicine and telecare* 2015; 21(2): 80-87.

108. McNamara RJ, McKeough ZJ, McKenzie DK, Alison JA. Acceptability of the aquatic environment for exercise training by people with chronic obstructive pulmonary disease with physical comorbidities: Additional results from a randomised controlled trial. *Physiotherapy* 2015; 101(2): 187-192.



109. Menn P, Weber N, Holle R. Health-related quality of life in patients with severe COPD hospitalized for exacerbations - comparing EQ-5D, SF-12 and SGRQ. *Health and quality of life outcomes* 2010; 8: 39.
110. Miller JD. Lung volume reduction for emphysema and the Canadian lung volume reduction surgery (CLVR) project. *Canadian Respiratory Journal* 1999; 6(1): 26-32.
111. Milne RJ, Hockey H, Rea H. Long-term air humidification therapy is cost-effective for patients with moderate or severe chronic obstructive pulmonary disease or bronchiectasis. *Value in health : the journal of the International Society for Pharmacoeconomics and Outcomes Research* 2014; 17(4): 320-327.
112. Miravittles M, Anzueto A, Legnani D, Forstmeier L, Fargel M. Patient's perception of exacerbations of COPD-the PERCEIVE study. *Respir Med* 2007; 101(3): 453-460.
113. Miravittles M, Huerta A, Fernandez-Villar J, Alcazar B, Villa G, Forne C, Cuesta M, Crespo C, Garcia-Rio F. Generic utilities in chronic obstructive pulmonary disease patients stratified according to different staging systems. *Health and quality of life outcomes* 2014; 12(1): 120.
114. Miravittles M, Huerta A, Valle M, Garcia-Sidro P, Forne C, Crespo C, Lopez-Campos JL. Clinical variables impacting on the estimation of utilities in chronic obstructive pulmonary disease. *International journal of chronic obstructive pulmonary disease* 2015; 10: 367-377.
115. Miravittles M, Izquierdo I, Herrejon A, Torres JV, Baro E, Borja J. COPD severity score as a predictor of failure in exacerbations of COPD. The ESFERA study. *Respir Med* 2011; 105(5): 740-747.
116. Miravittles M, Llor C, de Castellar R, Izquierdo I, Baro E, Donado E. Validation of the COPD severity score for use in primary care: the NEREA study. *The European respiratory journal* 2009; 33(3): 519-527.
117. Miravittles M, Molina J, Quintano JA, Campuzano A, Perez J, Roncero C. Factors associated with depression and severe depression in patients with COPD. *Respir Med* 2014.
118. Miravittles M, Naberan K, Cantoni J, Azpeitia A. Socioeconomic status and health-related quality of life of patients with chronic obstructive pulmonary disease. *Respiration; international review of thoracic diseases* 2011; 82(5): 402-408.
119. Mittmann N, Chan D, Trakas K, Risebrough N. Health utility attributes for chronic conditions. *Disease Management and Health Outcomes* 2001; 9(1): 11-21.
120. Mittmann N, Trakas K, Risebrough N, Liu BA. Utility scores for chronic conditions in a community-dwelling population. *Pharmacoeconomics* 1999; 15(4): 369-376.
121. Mo F, Choi BC, Li FC, Merrick J. Using Health Utility Index (HUI) for measuring the impact on health-related quality of Life (HRQL) among individuals with chronic diseases. *TheScientificWorldJournal* 2004; 4: 746-757.
122. Molimard M, Colthorpe P. Inhaler Devices for Chronic Obstructive Pulmonary Disease: Insights from Patients and Healthcare Practitioners. *Journal of aerosol medicine and pulmonary drug delivery* 2014.
123. Moore AC, Stone S. Meeting the needs of patients with COPD: patients' preference for the Diskus inhaler compared with the Handihaler. *Int J Clin Pract* 2004; 58(5): 444-450.
124. Mutterlein R, Schmidt G, Fleischer W, Freund E. A new inhalation system for bronchodilatation. [German]

Ein Neues Inhalationssystem Zur Bronchodilatation. Studie Zur Akzeptanz Des Inhalators  
 Ingelheim M Bei Chronisch Obstruktiven Atemwegserkrankungen. *Fortschritte der Medizin*  
 1990; 108(11): 61-66.

125. Naberan K, Azpeitia A, Cantoni J, Miravittles M. Impairment of quality of life in women with chronic obstructive pulmonary disease. *Respir Med* 2012; 106(3): 367-373.
126. Nakken N, Janssen DJ, van Vliet M, de Vries GJ, Clappers-Gielen GA, Michels AJ, Muris JW, Vercoulen JH, Wouters EF, Spruit MA. Gender differences in partners of patients with COPD and their perceptions about the patients. *International journal of chronic obstructive pulmonary disease* 2017; 12: 95-104.
127. Nilsson E, Wenemark M, Bendtsen P, Kristenson M. Respondent satisfaction regarding SF-36 and EQ-5D, and patients' perspectives concerning health outcome assessment within routine health care. *Qual Life Res* 2007; 16(10): 1647-1654.
128. Nishimura K, Oga T, Ikeda A, Hajiro T, Tsukino M, Koyama H. Comparison of health-related quality of life measurements using a single value in patients with asthma and chronic obstructive pulmonary disease. *The Journal of asthma : official journal of the Association for the Care of Asthma* 2008; 45(7): 615-620.
129. Nolan CM, Longworth L, Lord J, Canavan JL, Jones SE, Kon SS, Man WD. The EQ-5D-5L health status questionnaire in COPD: validity, responsiveness and minimum important difference. *Thorax* 2016; 71(6): 493-500.
130. Norris WM, Nielsen EL, Engelberg RA, Curtis JR. Treatment preferences for resuscitation and critical care among homeless persons. *Chest* 2005; 127(6): 2180-2187.
131. Nyman JA, Barleen NA, Dowd BE, Russell DW, Coons SJ, Sullivan PW. Quality-of-life weights for the US population: self-reported health status and priority health conditions, by demographic characteristics. *Medical care* 2007; 45(7): 618-628.
132. O'Reilly JF, Williams AE, Rice L. Health status impairment and costs associated with COPD exacerbation managed in hospital. *Int J Clin Pract* 2007; 61(7): 1112-1120.
133. Ohno T, Wada S, Hanada S, Sawaguchi H, Muraki M, Tohda Y. Efficacy of indacaterol on quality of life and pulmonary function in patients with COPD and inhaler device preferences. *International journal of chronic obstructive pulmonary disease* 2014; 9: 107-114.
134. Ojoo JC, Moon T, McGlone S, Martin K, Gardiner ED, Greenstone MA, Morice AH. Patients' and carers' preferences in two models of care for acute exacerbations of COPD: results of a randomised controlled trial. *Thorax* 2002; 57(2): 167-169.
135. Oliver S, Rees PJ. Inhaler use in chronic obstructive pulmonary disease. *Int J Clin Pract* 1997; 51(7): 443-445.
136. Olszanecka-Glinianowicz M, Almgren-Rachtan A. The adherence and illness perception of patients diagnosed with asthma or chronic obstructive pulmonary disease treated with polytherapy using new generation Cyclohaler. *Postepy dermatologii i alergologii* 2014; 31(4): 235-246.
137. Osman LM, Ayres JG, Garden C, Reglitz K, Lyon J, Douglas JG. Home warmth and health status of COPD patients. *European Journal of Public Health* 2008; 18(4): 399-405.
138. Pallin M, Walsh S, O'Driscoll MF, Murray C, Cahalane A, Brown L, Carter M, Mitchell P, McDonnell TJ, Butler MW. Overwhelming support among urban Irish COPD patients for lung cancer screening by low-dose CT scan. *Lung* 2012; 190(6): 621-628.
139. Park JH, Park HK, Jung H, Lee SS, Koo HK. Parathyroid Hormone as a Novel Biomarker for Chronic Obstructive Pulmonary Disease: Korean National Health and Nutrition Examination Survey. *PloS one* 2015; 10(9): e0138482.
140. Partridge MR, Dal Negro RW, Olivieri D. Understanding patients with asthma and COPD: insights from a European study. *Primary care respiratory journal : journal of the General Practice Airways Group* 2011; 20(3): 315-323, 317 p following 323.

141. Pascual S, Feimer J, De Soyza A, Sauleda Roig J, Haughney J, Padulles L, Seoane B, Reveda L, Ribera A, Chrystyn H. Preference, satisfaction and critical errors with Genuair and Breezhale inhalers in patients with COPD: a randomised, cross-over, multicentre study. *NPJ primary care respiratory medicine* 2015; 25: 15018.
142. Paterson C, Langan CE, McKaig GA, Anderson PM, MacLaine GDH, Rose LB, Walker SJ, Campbell MJ. Assessing patient outcomes in acute exacerbations of chronic bronchitis: The measure your medical outcome profile (MYMOP), medical outcomes study 6-item general health survey (MOS-6A) and EuroQol (EQ-5D). *Quality of Life Research* 2000; 9(5): 521-527.
143. Persson L-O, Engstrom C-P, Ryden A, Larsson S, Sullivan M. Life values in patients with COPD: Relations with pulmonary functioning and health related quality of life. [References]. *Quality of Life Research: An International Journal of Quality of Life Aspects of Treatment, Care & Rehabilitation* 2005; 14(2): 349-359.
144. Peters M, Crocker H, Jenkinson C, Doll H, Fitzpatrick R. The routine collection of patient-reported outcome measures (PROMs) for long-term conditions in primary care: a cohort survey. *BMJ Open* 2014; 4(2): e003968.
145. Pickard AS, Yang Y, Lee TA. Comparison of health-related quality of life measures in chronic obstructive pulmonary disease. *Health and quality of life outcomes* 2011; 9: 26.
146. Pisa G, Freytag S, Schandry R. Chronic obstructive pulmonary disease (COPD) patients' disease-related preferences : a study using conjoint analysis. *Patient* 2013; 6(2): 93-101.
147. Polatli M, Bilgin C, Saylan B, Baslilar S, Toprak E, Ergen H, Bakan ND, Kart L, Kilic Z, Ustunel A, Sengun A, Varol Y, Yilmaz A, Ataol C, Bulgur D, Bozdogan S, Tunaboyu I, Ozkan ZG, Uysal E, Gulgosteren S, Akin N, Selim Y, Irmak M, Turgut E, Keskin O, Bektas Uysal H, Sofuoglu N, Yilmaz M. A cross sectional observational study on the influence of chronic obstructive pulmonary disease on activities of daily living: The COPD-Life study
- Kronik obstruktif akciğer hastalığı'nın günlük yaşam aktivitelerine etkilerini araştırma amacıyla yönelik kesitsel gözlem çalışması: KOAH'lı yaşam çalışması. *Tuberkuloz ve Toraks* 2012; 60(1): 1-12.
148. Price D, Lee AJ, Sims EJ, Kemp L, Hillyer EV, Chisholm A, von Ziegenweidt J, Williams A. Characteristics of patients preferring once-daily controller therapy for asthma and COPD: a retrospective cohort study. *Primary care respiratory journal : journal of the General Practice Airways Group* 2013; 22(2): 161-168.
149. Price D, Small M, Milligan G, Higgins V, Gil EG, Estruch J. Impact of night-time symptoms in COPD: a real-world study in five European countries. *International journal of chronic obstructive pulmonary disease* 2013; 8: 595-603.
150. Puente-Maestu L, Calle M, Rodriguez-Hermosa JL, Campuzano A, de Miguel Diez J, Alvarez-Sala JL, Puente-Andues L, Perez-Gutierrez MJ, Lee SY. Health literacy and health outcomes in chronic obstructive pulmonary disease. *Respir Med* 2016; 115: 78-82.
151. Puhan MA, Behnke M, Devereaux PJ, Montori VM, Braendli O, Frey M, Schunemann HJ. Measurement of agreement on health-related quality of life changes in response to respiratory rehabilitation by patients and physicians - A prospective study. *Respir Med* 2004; 98(12): 1195-1202.
152. Puhan MA, Guyatt GH, Goldstein R, Mador J, McKim D, Stahl E, Griffith L, Schunemann HJ. Relative responsiveness of the Chronic Respiratory Questionnaire, St. Georges Respiratory Questionnaire and four other health-related quality of life instruments for patients with chronic lung disease. *Respir Med* 2007; 101(2): 308-316.

153. Punekar YS, Rodriguez-Roisin R, Sculpher M, Jones P, Spencer M. Implications of chronic obstructive pulmonary disease (COPD) on patients' health status: a western view. *Respir Med* 2007; 101(3): 661-669.
154. Reinke LF, Slatore CG, Udris EM, Moss BR, Johnson EA, Au DH. The association of depression and preferences for life-sustaining treatments in veterans with chronic obstructive pulmonary disease. *Journal of pain and symptom management* 2011; 41(2): 402-411.
155. Reinke LF, Uman J, Udris EM, Moss BR, Au DH. Preferences for death and dying among veterans with chronic obstructive pulmonary disease. *The American journal of hospice & palliative care* 2013; 30(8): 768-772.
156. Rhee CK, Kim K, Yoon HK, Kim JA, Kim SH, Lee SH, Park YB, Jung KS, Yoo KH, Hwang YI. Natural course of early COPD. *International journal of chronic obstructive pulmonary disease* 2017; 12: 663-668.
157. Riley JH, Tabberer M, Richard N, Donald A, Church A, Harris SS. Correct usage, ease of use, and preference of two dry powder inhalers in patients with COPD: analysis of five phase III, randomized trials. *International journal of chronic obstructive pulmonary disease* 2016; 11: 1873-1880.
158. Ringbaek T, Brondum E, Martinez G, Lange P. EuroQoL in assessment of the effect of pulmonary rehabilitation COPD patients. *Respir Med* 2008; 102(11): 1563-1567.
159. Rinnenburger D, Alma MG, Bigioni D, Brunetti G, Liberati C, Magliacani V, Monaco G, Reggiani L, Taronna G, Cecchini L. End-of-life decision making in respiratory failure. The therapeutic choices in chronic respiratory failure in a 7-item questionnaire. *Annali dell'Istituto superiore di sanita* 2012; 48(3): 328-333.
160. Rocker GM, Dodek PM, Heyland DK. Toward optimal end-of-life care for patients with advanced chronic obstructive pulmonary disease: insights from a multicentre study. *Canadian respiratory journal : journal of the Canadian Thoracic Society* 2008; 15(5): 249-254.
161. Rocker GM, Simpson AC, Horton R, Sinuff T, Demmons J, Hernandez P, Marciniuk D. Opioid therapy for refractory dyspnea in patients with advanced chronic obstructive pulmonary disease: patients' experiences and outcomes. *CMAJ open* 2013; 1(1): E27-36.
162. Rodriguez Gonzalez-Moro JM, de Lucas Ramos P, Izquierdo Alonso JL, Lopez-Muniz Ballesteros B, Anton Diaz E, Ribera X, Martin A. Impact of COPD severity on physical disability and daily living activities: EDIP-EPOC I and EDIP-EPOC II studies. *Int J Clin Pract* 2009; 63(5): 742-750.
163. Rutten-van Molken MP, Hoogendoorn M, Lamers LM. Holistic preferences for 1-year health profiles describing fluctuations in health: the case of chronic obstructive pulmonary disease. *PharmacoEconomics* 2009; 27(6): 465-477.
164. Rutten-van Molken MP, Oostenbrink JB, Tashkin DP, Burkhart D, Monz BU. Does quality of life of COPD patients as measured by the generic EuroQol five-dimension questionnaire differentiate between COPD severity stages? *Chest* 2006; 130(4): 1117-1128.
165. Sassi-Dambron DE, Eakin EG, Ries AL, Kaplan RM. Treatment of dyspnea in COPD: A controlled clinical trial of dyspnea management strategies. *Chest* 1995; 107(3): 724-729.
166. Scharf SM, Maimon N, Simon-Tuval T, Bernhard-Scharf BJ, Reuveni H, Tarasiuk A. Sleep quality predicts quality of life in chronic obstructive pulmonary disease. *International journal of chronic obstructive pulmonary disease* 2011; 6: 1-12.
167. Schunemann HJ, Griffith L, Stubbing D, Goldstein R, Guyatt GH. A clinical trial to evaluate the measurement properties of 2 direct preference instruments administered with and

without hypothetical marker states. *Medical decision making : an international journal of the Society for Medical Decision Making* 2003; 23(2): 140-149.

168. Schunemann HJ, Norman G, Puhan MA, Stahl E, Griffith L, Heels-Ansdell D, Montori VM, Wiklund I, Goldstein R, Mador MJ, Guyatt GH. Application of generalizability theory confirmed lower reliability of the standard gamble than the feeling thermometer. *Journal of clinical epidemiology* 2007; 60(12): 1256-1262.

169. Seymour JM, Moore L, Jolley CJ, Ward K, Creasey J, Steier JS, Yung B, Man WDC, Hart N, Polkey MI, Moxham J. Outpatient pulmonary rehabilitation following acute exacerbations of COPD. *Thorax* 2010; 65(5): 423-428.

170. Sharafkhaneh A, Wolf RA, Goodnight S, Hanania NA, Make BJ, Tashkin DP. Perceptions and attitudes toward the use of nebulized therapy for COPD: patient and caregiver perspectives. *Copd* 2013; 10(4): 482-492.

171. Siler TM, LaForce CF, Kianifard F, Williams J, Spangenthal S. Once-daily indacaterol 75 micro g in moderate- to-severe COPD: Results of a Phase IV study assessing time until patients' perceived onset of effect. *International Journal of COPD* 2014; 9: 919-925.

172. Simon J. Attitudes of Hungarian asthmatic and COPD patients affecting disease control: empirical research based on Health Belief Model. *Frontiers in pharmacology* 2013; 4: 135.

173. Small M, Higgins V, Lees A, Johns N, Mastrangelo A, Nazareth T, Turner SJ. Physician-Patient Concordance in Pharmacological Management of Patients with COPD. *Copd* 2015; 12(5): 473-483.

174. Solem CT, Sun SX, Sudharshan L, Macahilig C, Katyal M, Gao X. Exacerbation-related impairment of quality of life and work productivity in severe and very severe chronic obstructive pulmonary disease. *International journal of chronic obstructive pulmonary disease* 2013; 8: 641-652.

175. Sorensen SS, Pedersen KM, Weinreich UM, Ehlers L. Economic Evaluation of Community-Based Case Management of Patients Suffering From Chronic Obstructive Pulmonary Disease. *Applied health economics and health policy* 2016; 1-12.

176. Spencer LM, Alison JA, McKeough ZJ. A Survey of Opinions and Attitudes Toward Exercise Following a 12-month Maintenance Exercise Program for People with COPD. *Cardiopulmonary physical therapy journal* 2013; 24(3): 30-35.

177. Stahl E, Lindberg A, Jansson SA, Ronmark E, Svensson K, Andersson F, Lofdahl CG, Lundback B. Health-related quality of life is related to COPD disease severity. *Health and quality of life outcomes* 2005; 3: 56.

178. Stapleton RD, Nielsen EL, Engelberg RA, Patrick DL, Curtis JR. Association of depression and life-sustaining treatment preferences in patients with COPD. *Chest* 2005; 127(1): 328-334.

179. Starkie HJ, Briggs AH, Chambers MG, Jones P. Predicting EQ-5D values using the SGRQ. *Value in health : the journal of the International Society for Pharmacoeconomics and Outcomes Research* 2011; 14(2): 354-360.

180. Stavem K. Reliability, validity and responsiveness of two multiattribute utility measures in patients with chronic obstructive pulmonary disease. *Qual Life Res* 1999; 8(1-2): 45-54.

181. Stavem K. Association of willingness to pay with severity of chronic obstructive pulmonary disease, health status and other preference measures. *The international journal of tuberculosis and lung disease : the official journal of the International Union against Tuberculosis and Lung Disease* 2002; 6(6): 542-549.

182. Stavem K, Kristiansen IS, Olsen JA. Association of time preference for health with age and disease severity. *The European journal of health economics : HEPAC : health economics in prevention and care* 2002; 3(2): 120-124.
183. Stein K, Dyer M, Milne R, Round A, Ratcliffe J, Brazier J. The precision of health state valuation by members of the general public using the standard gamble. *Qual Life Res* 2009; 18(4): 509-518.
184. Steuten L, Vrijhoef B, Van Merode F, Wesseling GJ, Spreeuwenberg C. Evaluation of a regional disease management programme for patients with asthma or chronic obstructive pulmonary disease. *International journal for quality in health care : journal of the International Society for Quality in Health Care / ISQua* 2006; 18(6): 429-436.
185. Stoddart A, van der Pol M, Pinnock H, Hanley J, McCloughan L, Todd A, Krishan A, McKinstry B. Telemonitoring for chronic obstructive pulmonary disease: a cost and cost-utility analysis of a randomised controlled trial. *Journal of telemedicine and telecare* 2015; 21(2): 108-118.
186. Sundh J, Johansson G, Larsson K, Linden A, Lofdahl CG, Janson C, Sandstrom T. Comorbidity and health-related quality of life in patients with severe chronic obstructive pulmonary disease attending Swedish secondary care units. *International journal of chronic obstructive pulmonary disease* 2015; 10: 173-183.
187. Sutherland ER, Brazinsky S, Feldman G, McGinty J, Tomlinson L, Denis-Mize K. Nebulized formoterol effect on bronchodilation and satisfaction in COPD patients compared to QID ipratropium/albuterol MDI. *Current medical research and opinion* 2009; 25(3): 653-661.
188. Svedsater H, Dale P, Garrill K, Walker R, Woepse MW. Qualitative assessment of attributes and ease of use of the ELLIPTA dry powder inhaler for delivery of maintenance therapy for asthma and COPD. *BMC pulmonary medicine* 2013; 13: 72.
189. Szende A, Leidy NK, Stahl E, Svensson K. Estimating health utilities in patients with asthma and COPD: evidence on the performance of EQ-5D and SF-6D. *Qual Life Res* 2009; 18(2): 267-272.
190. Tabak M, Brusse-Keizer M, van der Valk P, Hermens H, Vollenbroek-Hutten M. A telehealth program for self-management of COPD exacerbations and promotion of an active lifestyle: a pilot randomized controlled trial. *International journal of chronic obstructive pulmonary disease* 2014; 9: 935-944.
191. Taylor SJC, Sohanpal R, Bremner SA, Devine A, McDaid D, Fernandez JL, Griffiths CJ, Eldridge S. Self-management support for moderate-to-severe chronic obstructive pulmonary disease: A pilot randomised controlled trial. *British Journal of General Practice* 2012; 62(603): e687-e695.
192. Torrance G, Walker V, Grossman R, Mukherjee J, Vaughan D, La Forge J, Lampron N. Economic evaluation of ciprofloxacin compared with usual antibacterial care for the treatment of acute exacerbations of chronic bronchitis in patients followed for 1 year. *PharmacoEconomics* 1999; 16(5 Pt 1): 499-520.
193. Torres-Sanchez I, Valenza MC, Saez-Roca G, Cabrera-Martos I, Lopez-Torres I, Rodriguez-Torres J. Results of a Multimodal Program During Hospitalization in Obese COPD Exacerbated Patients. *Copd* 2016; 13(1): 19-25.
194. Travaline JM, Silverman HJ. Discussions with outpatients with chronic obstructive pulmonary disease regarding mechanical ventilation as life-sustaining therapy. *Southern medical journal* 1995; 88(10): 1034-1038.

195. Turner A, Anderson J, Wallace L, Kennedy-Williams P. Evaluation of a self-management programme for patients with chronic obstructive pulmonary disease. *Chronic respiratory disease* 2014; 11(3): 163-172.
196. Utens CM, Goossens LM, van Schayck OC, Rutten-van Molken MP, van Litsenburg W, Janssen A, van der Pouw A, Smeenk FW. Patient preference and satisfaction in hospital-at-home and usual hospital care for COPD exacerbations: results of a randomised controlled trial. *International journal of nursing studies* 2013; 50(11): 1537-1549.
197. Utens CM, van Schayck OC, Goossens LM, Rutten-van Molken MP, DeMunck DR, Seezink W, van Vliet M, Smeenk FW. Informal caregiver strain, preference and satisfaction in hospital-at-home and usual hospital care for COPD exacerbations: results of a randomised controlled trial. *International journal of nursing studies* 2014; 51(8): 1093-1102.
198. Utens CMA, Goossens LMA, Smeenk FWJM, Rutten-van Molken MPMH, Van Vliet M, Braken MW, Van Eijdsden LMGA, Van Schayck OCP. Early assisted discharge with generic community nursing for chronic obstructive pulmonary disease exacerbations: Results of a randomised controlled trial. *BMJ Open* 2012; 2(5).
199. van Boven JFM, Stuurman-Bieze AGG, Hiddink EG, Postma MJ. Effects of targeting disease and medication management interventions towards patients with COPD. [References]. *Current medical research and opinion* 2016; 32(2): 229-239.
200. van den Bemt L, Schermer TR, Smeele IJ, Boonman-de Winter LJ, van Boxem T, Denis J, Grootens-Stekelenburg JG, Grol RP, van Weel C. An expert-supported monitoring system for patients with chronic obstructive pulmonary disease in general practice: results of a cluster randomised controlled trial. *The Medical journal of Australia* 2009; 191(5): 249-254.
201. van der Palen J, Ginko T, Kroker A, van der Valk P, Goosens M, Padulles L, Seoane B, Rebeda L, Garcia Gil E. Preference, satisfaction and errors with two dry powder inhalers in patients with COPD. *Expert opinion on drug delivery* 2013; 10(8): 1023-1031.
202. van der Palen J, Thomas M, Chrystyn H, Sharma RK, van der Valk PD, Goosens M, Wilkinson T, Stonham C, Chauhan AJ, Imber V, Zhu CQ, Svedsater H, Barnes NC. A randomised open-label cross-over study of inhaler errors, preference and time to achieve correct inhaler use in patients with COPD or asthma: comparison of ELLIPTA with other inhaler devices. *NPJ primary care respiratory medicine* 2016; 26: 16079.
203. van der Palen J, van der Valk P, Goosens M, Groothuis-Oudshoorn K, Brusse-Keizer M. A randomised cross-over trial investigating the ease of use and preference of two dry powder inhalers in patients with asthma or chronic obstructive pulmonary disease. *Expert opinion on drug delivery* 2013; 10(9): 1171-1178.
204. Van Valk PD, Monninkhof E, Van Palen JD, Zielhuis G, Van Herwaarden C. Effect of discontinuation of inhaled corticosteroids in patients with chronic obstructive pulmonary disease: The cope study. *American Journal of Respiratory and Critical Care Medicine* 2002; 166(10): 1358-1363.
205. Vestbo J, Vogelmeier C, Small M, Higgins V. Understanding the GOLD 2011 Strategy as applied to a real-world COPD population. *Respir Med* 2014; 108(5): 729-736.
206. Villar Balboa I, Carrillo Munoz R, Regi Bosque M, Marzo Castillejo M, Arcusa Villacampa N, Segundo Yague M. [Factors associated with the quality of life in patients with chronic obstructive pulmonary disease]. *Atencion primaria / Sociedad Espanola de Medicina de Familia y Comunitaria* 2014; 46(4): 179-187.
207. Vogelmeier C, Paggiaro PL, Dorca J, Sliwinski P, Mallet M, Kirsten AM, Beier J, Seoane B, Segarra RM, Leselbaum A. Efficacy and safety of aclidinium/formoterol versus

salmeterol/fluticasone: a phase 3 COPD study. *The European respiratory journal* 2016; 48(4): 1030-1039.

208. Walters SJ, Brazier JE. What is the relationship between the minimally important difference and health state utility values? The case of the SF-6D. *Health and quality of life outcomes* 2003; 1(4).

209. Wildman MJ, Sanderson CF, Groves J, Reeves BC, Ayres JG, Harrison D, Young D, Rowan K. Survival and quality of life for patients with COPD or asthma admitted to intensive care in a UK multicentre cohort: the COPD and Asthma Outcome Study (CAOS). *Thorax* 2009; 64(2): 128-132.

210. Wilke S, Janssen DJA, Wouters EFM, Schols JMGA, Franssen FME, Spruit MA. Correlations between disease-specific and generic health status questionnaires in patients with advanced COPD: a one-year observational study. *Health and quality of life outcomes* 2012; 10(98).

211. Wilson DS, Gillion MS, Rees PJ. Use of dry powder inhalers in COPD. *Int J Clin Pract* 2007; 61(12): 2005-2008.

212. Wilson KG, Aaron SD, Vandemheen KL, Hebert PC, McKim DA, Fiset V, Graham ID, Sevigny E, O'Connor AM. Evaluation of a decision aid for making choices about intubation and mechanical ventilation in chronic obstructive pulmonary disease. [References]. *Patient Education and Counseling* 2005; 57(1): 88-95.

213. Wu M, Zhao Q, Chen Y, Fu C, Xu B. Quality of life and its association with direct medical costs for COPD in urban China. *Health and quality of life outcomes* 2015; 13: 57.

214. Young-Mi J, Lee H. Chronic obstructive pulmonary disease in Korea: Prevalence, risk factors, and quality of life. [Korean]. *Journal of Korean Academy of Nursing* 2011; 41(2): 149-156.

215. Yun Kirby S, Zhu CQ, Kerwin EM, Stanford RH, Georges G. A Preference Study of Two Placebo Dry Powder Inhalers in Adults with COPD: ELLIPTA(R) Dry Powder Inhaler (DPI) versus DISKUS(R) DPI. *Copd* 2016; 13(2): 167-175.

216. Zanaboni P, Hoaas H, Aaroen Lien L, Hjalmarssen A, Wootton R. Long-term exercise maintenance in COPD via telerehabilitation: a two-year pilot study. *Journal of telemedicine and telecare* 2017; 23(1): 74-82.

217. Zanini A, Aiello M, Adamo D, Casale S, Cherubino F, Della Patrona S, Raimondi E, Zampogna E, Chetta A, Spanevello A. Estimation of Minimal Clinically Important Difference in EQ-5D Visual Analog Scale Score After Pulmonary Rehabilitation in Subjects With COPD. *Respiratory care* 2014.
