# Supplementary material
Source: HighWire-hosted journal article supplement (https://erj.ersjournals.com/content/52/1/1800222)
Supplement: inline-supplementary-material-3 [file inline-supplementary-material-3.pdf]

Appendix 3. Supplementary tables  
 Supplementary Table 1. Study characteristics

| Study ID         | Values and preferences category | Instrument     | Study design           | Description of health states | Age: Mean (SD) or other format                                                                                   | Country or countries of Origin | Setting                                                               | Gender (Male/Female)                   | Sample size | Sampling Strategy | Response rate | Funding Sources                                                                                                                                                                                                         |
|------------------|---------------------------------|----------------|------------------------|------------------------------|------------------------------------------------------------------------------------------------------------------|--------------------------------|-----------------------------------------------------------------------|----------------------------------------|-------------|-------------------|---------------|-------------------------------------------------------------------------------------------------------------------------------------------------------------------------------------------------------------------------|
| Agh 2011         | Utility                         | Time trade off | Cross-sectional survey | EQ-5D                        | 63.83 years (SD 11.24); 40–50 years 16 (9.5%) 51–60 years 57 (33.5%) 61–70 years 48 (28.2%) ≥71 years 49 (28.8%) | Hungary                        | outpatient                                                            | Males 71 (41.8%)<br>Females 99 (58.2%) | 170         | Consecutive       | 77.50%        | Not reported                                                                                                                                                                                                            |
| Alcazar 2012     | Utility                         | VAS            | Cross-sectional survey | EQ-5D                        | 67.3 (8.7)                                                                                                       | Spain                          | hospital centres                                                      | 119(93.7%)/8(6.3%)                     | 127         | Not reported      | NR            | industry (GlaxoSmithKline)                                                                                                                                                                                              |
| Allen-Ramey 2012 | Utility                         | SF-6D          | Cross-sectional survey | SF-6D                        | 63.24 (10.90)                                                                                                    | USA                            | self-reported survey                                                  | 559 (57.63)/411 (42.37)                | 970         | Random            | NR            | industry                                                                                                                                                                                                                |
| Antoniou 2014    | Utility                         | VAS            | Cohort study           | EQ-5D                        | 67.03 (10.12)                                                                                                    | Romania                        | inpatient, the Pulmonary Disease University Hospital in Iasi, Romania | 62/18 (77.5%/22.5%)                    | 80          | Consecutive       | unclear       | The authors have no relevant affiliations or financial involvement with any organization or entity with a financial interest in or financial conflict with the subject matter or materials discussed in the manuscript. |
| Arne 2009        | Utility                         | EQ-5D          | Cross-sectional survey | EQ-5D                        | 69.1 (95% CI 68.3 69.9)                                                                                          | Sweden                         | self-reported survey                                                  | 55.7%/44.3% (95% CI 40.0 48.9)         | 526         | Random            | 64.00%        | the Swedish Heart-Lung Foundation, the Swedish Heart and Lung Association and the County Council of Värmland                                                                                                            |
| Berkius 2013     | Utility                         | VAS, EQ-5D     | Cohort study           | EQ-5D                        | 69.7 (8.7) completed; dead or lost 70.7 (9.0)                                                                    | Sweden                         | secondary                                                             | 12/19 completed; dead or lost 6/14     |             | Consecutive       | 61% followed  | not reported                                                                                                                                                                                                            |

|               |                      |                                                  |                                                      |                                                  |                                                                    |                 |                      |                                                                                                                    |      |                                                       |                       |                                                                                                                                                                                                                                            |
|---------------|----------------------|--------------------------------------------------|------------------------------------------------------|--------------------------------------------------|--------------------------------------------------------------------|-----------------|----------------------|--------------------------------------------------------------------------------------------------------------------|------|-------------------------------------------------------|-----------------------|--------------------------------------------------------------------------------------------------------------------------------------------------------------------------------------------------------------------------------------------|
| Boland 2014   | Utility              | VAS, EQ-5D                                       | Cross-sectional survey                               | EQ-5D                                            | 68 (11) - average                                                  | the Netherlands | primary              | Men 56%/Women 44%                                                                                                  | 611  | Other: based on a database                            | 43% (611 out of 1431) | Stichting Achmea, a Dutch Healthcare Insurance Company, and the Netherlands Organisation for Health Research and Development (Zon-MW), subprogramme Effects & Costs (project number 171002203)                                             |
| Boland 2015   | Utility              | EQ-5D, mapping                                   | Cross-sectional survey (data from 3 clinical trials) | EQ-5D                                            | 68 (11)                                                            | the Netherlands | primary, secondary   | men 55.0; women 45%                                                                                                | 1303 | Other: trial based                                    | NR                    | Not reported                                                                                                                                                                                                                               |
| Boland 2016   | Utility              | EQ-5D utility                                    | Randomized controlled trial                          | EQ-5D                                            | Mean (SD) RECODE Group: 68.2 (11.3), Usual care Group: 68.4 (11.1) | The Netherlands | primary care         | Male/female in Number (percentage) RECODE Group: 280 (50.5%)/274 (49.5%) Usual care group: 305 (57.3%)/227 (42.3%) | 1086 | not reported                                          | not reported          | private for profit and governmental: grants from Stichting Achmea Gezondheidszorg (SAG), a research fund of a Dutch Healthcare insurance company, and the Netherlands Organisation for Health Research and Development (Zon-MW)(171002203) |
| Borge 2014    | Uncategorized survey | Illness perception scale                         | Cross-sectional survey                               | Booklet/card                                     | 64.6 (10.2); in 36, max 87                                         | Norway          | outpatient           | male 79 (51.3) Female 75 (48.7)                                                                                    | 154  | Consecutive                                           | 40.00%                | Not reported                                                                                                                                                                                                                               |
| Boros 2012    | Utility              | VAS                                              | Cross-sectional survey                               | EQ-5D, VAS                                       | 64.41 (9.86)                                                       | Poland          | primary, secondary   | men 64%; women 36%                                                                                                 | 8537 | Other: asking physicians to provide enrolled patients | 92.00%                | industry support                                                                                                                                                                                                                           |
| Bourbeau 2007 | Utility              | VAS                                              | Cohort study                                         | EQ-5D                                            | mean 66 (range 41-88)                                              | Canada          | primary, secondary   | male: 239 (57)/female 182 (43%)                                                                                    | 421  | Not reported                                          | NR                    | Not reported                                                                                                                                                                                                                               |
| Braido 2016   | Uncategorized survey | symptoms patients would like to be improved most | Cross-sectional study                                | no description                                   | Mean (SD) 73.88 (8.33)                                             | Italy           | University hospitals | 90 (62.5%)/54 (37.5%)                                                                                              | 144  | consecutive                                           | 89.3% (150 of 168)    | not reported                                                                                                                                                                                                                               |
| Bratas 2010   | Direct choice        | forced choice: treatment                         | Cross-sectional survey                               | Narrative explained by interviewer, Booklet/card | rehab 65.0 (9.1)/outpatients 67.2 (10.2)                           | Norway          | secondary            | male 110/female 95                                                                                                 | 205  | Consecutive                                           | 57.00%                | Not reported                                                                                                                                                                                                                               |

|                  |               |                                            |                             |                                                  |                                                                      |             |                                                                                                                 |                                                                                 |     |                  |                                                          |                                                                                                                                                                          |
|------------------|---------------|--------------------------------------------|-----------------------------|--------------------------------------------------|----------------------------------------------------------------------|-------------|-----------------------------------------------------------------------------------------------------------------|---------------------------------------------------------------------------------|-----|------------------|----------------------------------------------------------|--------------------------------------------------------------------------------------------------------------------------------------------------------------------------|
| Brophy 2008      | Direct choice | forced choice: inhaler                     | Randomized controlled trial | No description                                   | 68 (SD 7)                                                            | UK          | secondary                                                                                                       | male 13/female 12                                                               | 25  | Not reported     | 89% completed                                            | Not reported                                                                                                                                                             |
| Bulcun 2014      | Direct choice | Conjoint analysis/Discrete choice analysis | Cross-sectional survey      | Booklet/card                                     | 60.8 (SD 8.6)                                                        | Turkey      | secondary                                                                                                       | male 45/female 3                                                                | 49  | Consecutive      | NR                                                       | Not reported                                                                                                                                                             |
| Burns 2016       | Utility       | EQ-5D utility                              | Randomized controlled trial | EQ-5D                                            | Mean (SD) intervention group: 67.3 (15.1), control group: 69.3 (8.9) | UK          | Primary and secondary care                                                                                      | male/female number (percentage): 41 (56.2%)/32 (43.8%)<br>50 (66.7%)/25 (33.3%) | 148 | not reported     | 62.4% (148 of 237) completed at least 60% of the program | Governmental (funded by the National Institute for Health Research (NIHR) under its Research for Patient Benefit (RPB) Programme (Grant Reference No. PB-PG-0408-16225)) |
| Carlucci 2016    | Direct choice | Forced choice: treatment                   | Cross-sectional study       | book/card                                        | median [IQR]: 72 [65-78]                                             | Italy       | Inpatient; three Respiratory Units in Italy (two Rehabilitation Centres and one Respiratory Critical Care Unit) | 46 (82%)/9 (18%)                                                                | 55  | not reported     | 60.4 (55 of 91)                                          | not reported                                                                                                                                                             |
| Chakrabarti 2009 | Direct choice | forced choice: treatment                   | Cross-sectional survey      | Narrative explained by interviewer, Decision aid | Median 69, IQR: 14 years                                             | UK          | Hospitalized patients                                                                                           | 34/16 68%/32%                                                                   | 50  | Consecutive      | 82.0% (50/61)                                            | Not reported                                                                                                                                                             |
| Chapman 1993     | Direct choice | forced choice: inhaler                     | Cross-sectional survey      | Narrative explained by interviewer               | 70.8 (SD 5.4); range 63-85                                           | Canada      | outpatients                                                                                                     | men 41; women 39                                                                | 80  | Voluntary sample | NR                                                       | Asthma Society of Canada and by educational grants from Claxo Canada and 3M Pharmaceuticals, United States.                                                              |
| Chapman 2011     | Direct choice | forced choice: inhaler                     | Randomized controlled trial | Narrative explained by interviewer, Booklet/card | 63.9 (SD 9.21)                                                       | Canada, USA | NR                                                                                                              | male 60%, female 40%                                                            | 82  | Not reported     | NR                                                       | Industry - Novartis                                                                                                                                                      |
| Chen 2014        | Utility       | VAS, EQ-5D, and SF-6D                      | Cross-sectional survey      | EQ-5D, SF-12/SF-36                               | 72.9 (8.1)                                                           | China       | outpatient                                                                                                      | male 152(98.7%)/female 2 (1.3%)                                                 | 154 | Consecutive      | 9277.00%                                                 | University of Hong Kong Technology and Innovation seed funding                                                                                                           |

|                    |                        |                                                 |                        |                |                                                                                                                                                  |                                          |                                     |                                  |      |                                         |                                                                                                                                                                                                                                                      |                                                                                                                                                                                                                                                            |
|--------------------|------------------------|-------------------------------------------------|------------------------|----------------|--------------------------------------------------------------------------------------------------------------------------------------------------|------------------------------------------|-------------------------------------|----------------------------------|------|-----------------------------------------|------------------------------------------------------------------------------------------------------------------------------------------------------------------------------------------------------------------------------------------------------|------------------------------------------------------------------------------------------------------------------------------------------------------------------------------------------------------------------------------------------------------------|
| Chen 2016          | Utility, Direct choice | EQ-5D utility, willingness to pay               | Cross-sectional study  | EQ-5D          | Mean (SD) Whole sample 73.11 (9.99) mild 75.94 (9.54) moderate 71.11 (9.78) severe 74.88 (9.72) very severe 69.00 (9.96)                         | Taiwan                                   | Outpatient                          | 112 (86%)/30 (14%)               | 142  | not reported                            | 57.25% (142/248)                                                                                                                                                                                                                                     | Governmental and private not for profit: Taiwan's Ministry of Science and Technology for providing research grant. Other support included a grant from Buddhist Tzu-Chi General Hospital and from National Taiwan Normal University                        |
| Chou 2017          | Uncategorized survey   | Palliative Care Willingness Survey (PCWS) score | Cross-sectional study  | Not reported   | Mean 72.66 (SD, 10.34) years                                                                                                                     | Taiwan                                   | outpatient                          | 101/0                            | 101  | Purposive sampling                      | 71.00%                                                                                                                                                                                                                                               | not reported                                                                                                                                                                                                                                               |
| Chrystyn 2014      | Utility                | EQ-5D                                           | Cross-sectional survey | EQ-5D          | 65.2 (range 40-90)                                                                                                                               | France, Germany, Italy, Spain and the UK | primary, outpatients                | male 1035 (71.8)/408 (28.2)      | 1443 | Other: "pragmatic"                      | 49.00%                                                                                                                                                                                                                                               | Almirall S.A., Barcelona, Spain                                                                                                                                                                                                                            |
| Claessens 2000     | Direct choice          | Forced choice: treatment                        | Cohort study           | no description | median 70                                                                                                                                        | USA                                      | Hospitalization                     | 517/491 (51.3%/48.7%)            | 1008 | Consecutive                             | Unclear, for both lung cancer and COPD/ Response rates for patient interviews were 87% for Week 1 and 72% for Week 2 interviews for the 56% and 67% of patients, respectively, who were not comatose, intubated, or otherwise incapable of response. | SUPPORT was made possible by grants from the Robert Wood Johnson Foundation. Dr. Claessens was supported by a Veterans Administration Ambulatory Care Fellowship, White River Junction, Vermont, and a Fellowship in Palliative Medicine, Ottawa, Ontario. |
| Cleland 2007       | Utility                | VAS                                             | Cross-sectional survey | EQ-5D, VAS     | 67.80 (SD 10.59)                                                                                                                                 | UK                                       | primary                             | Male 57 (51.8)/ Female 53 (48.2) | 110  | Consecutive                             | 31.00%                                                                                                                                                                                                                                               | Aberdeen City Collective, Grampian Primary Care Trust and by an unconditional educational grant from Glaxo Smith Kline                                                                                                                                     |
| Collado-Mateo 2017 | Utility                | SF-6D utility                                   | Cross-sectional study  | SF-6D          | Age group: n (%)<br>40-49: 36 (19.05%)<br>50-59: 43 (22.75%)<br>60-69: 52 (27.51%)<br>70-79: 27 (14.29%)<br>80-89: 28 (14.81%)<br>90+: 3 (1.59%) | Chile                                    | general population (COPD subsample) | 69/120                           | 189  | Diagnosed patients from a random sample | not reported                                                                                                                                                                                                                                         | The author DCM is receiving a grant from the Spanish Ministry of Education, Culture and Sports (FPU14 / 01283). The author was previously granted a scholarship Predoctoral by the Tatiana Foundation Pérez de Guzmán the Good.                            |

|                            |               |                        |                             |             |                                                                                                 |                          |                                                                                                                                                 |                                                                                       |                                                         |             |                                                                                                                                                                             |                                                                       |
|----------------------------|---------------|------------------------|-----------------------------|-------------|-------------------------------------------------------------------------------------------------|--------------------------|-------------------------------------------------------------------------------------------------------------------------------------------------|---------------------------------------------------------------------------------------|---------------------------------------------------------|-------------|-----------------------------------------------------------------------------------------------------------------------------------------------------------------------------|-----------------------------------------------------------------------|
| Cross 2010                 | Utility       | VAS, EQ-5D             | Randomized controlled trial | EQ-5D       | Mean (SD) MCP arm 69.08 (9.85); No MCP arm 69.58 (9.51)/ 34–91 years                            | UK (4 centers in the UK) | All participants hospitalized at the beginning. But within the follow-up duration of 6 months, the study included both inpatient and outpatient | MCP arm, 143/115 55.43%/ 44.57%; no MCP arm, 155/109, 58.71% / 41.29%)                | 522 (MCP arm 258, no MCP arm 264)/ 526 enrolled         | Consecutive | 70.5%, 527 recruited, 748 consent requested. 83.1% followed up (99 participants without response); 70.7% followed up, out of 526, 372 participants provided evaluable data. | Governmental/ NHS Health Technology Assessment (HTA) research funding |
| Dacosta Dibonaventura 2012 | Utility       | SF-6D                  | Cross-sectional survey      | SF-12/SF-36 | all participants 65 to 69 years 2269/70 to 74 years 770/75 to 79 years 239/80 years or older 80 | USA                      | web-based consumer panel                                                                                                                        | male 1851                                                                             | all 3358/COPD 297                                       | Random      | NR                                                                                                                                                                          | industry                                                              |
| Dal Negro 2016             | Direct choice | Forced choice: inhaler | Cross-sectional study       | Verbal      | 68 years                                                                                        | Italy                    | outpatient                                                                                                                                      | unclear for COPD subgroup, 47% males in the entire sample, not reported for COPD only | 157 (47% of 333 patients had COPD, the rest had asthma) | Consecutive | not reported                                                                                                                                                                | not reported                                                          |

|                    |               |                       |                             |                                                                |                                                                             |                                                 |                                                                                                                                                                                             |                                    |                             |                           |                                                              |                          |
|--------------------|---------------|-----------------------|-----------------------------|----------------------------------------------------------------|-----------------------------------------------------------------------------|-------------------------------------------------|---------------------------------------------------------------------------------------------------------------------------------------------------------------------------------------------|------------------------------------|-----------------------------|---------------------------|--------------------------------------------------------------|--------------------------|
| Dales 1999         | Direct choice | Probability trade off | Repeated surveys            | Narrative explained by interviewer, Decision aid, Audiobooklet | 66 years (range, 42 to 84 years; quartile 57-74)                            | Canada                                          | outpatient (pulmonary function laboratory, as well as ambulatory respiratory and general medicine clinics of the Ottawa General Hospital, affiliated with the University of Ottawa, Canada) | 10men/10 women                     | 20                          | Consecutive               | 90.00%                                                       | Ontario Thoracic Society |
| Decramer 2001      | Utility       | VAS                   | Randomized controlled trial | EQ-5D, Pictorial descriptions of risk (pictogram)              | 63 (SD 8)                                                                   | 10 European Countries                           | unclear                                                                                                                                                                                     | male 413 (78%)/female 110 (22%)    | 523                         | Not reported              | NR                                                           | Not reported             |
| DiBonaventura 2012 | Utility       | SF-6D                 | Cross-sectional survey      | SF-12/SF-36                                                    | 40-64 years                                                                 | USA                                             | NR                                                                                                                                                                                          | male 53.4%                         | (COPD 1112)                 | Random                    | 18.50%                                                       | Kantar Health, Pfizer    |
| Ding 2017          | Utility       | SF-6D utility         | Cross-sectional study       | SF-6D                                                          | 5 European countries: mean±SD 57.6±13.2 years; USA: mean±SD 62.0±12.2 years | France, Germany, Italy, Spain, UK (5EU) and USA | outpatient                                                                                                                                                                                  | 5EU: 54,3%/45,7%; USA: 58,8%/41,2% | 3672 (5EU: 2006; USA: 1666) | Online survey respondents | USA: 13,53%; SEU 2011 period: 19,69%; SEU 2013 period: 15,95 | AstraZeneca              |

|                      |                      |                                                              |                                                                |                                    |                                                                                                                                                                                                                   |               |                                                                                      |                                                                                                                                                                                                   |                                                                                                                                                              |              |                                                                                                                                                                                                         |                                                                                                                                                                                                                                                                                                                                      |
|----------------------|----------------------|--------------------------------------------------------------|----------------------------------------------------------------|------------------------------------|-------------------------------------------------------------------------------------------------------------------------------------------------------------------------------------------------------------------|---------------|--------------------------------------------------------------------------------------|---------------------------------------------------------------------------------------------------------------------------------------------------------------------------------------------------|--------------------------------------------------------------------------------------------------------------------------------------------------------------|--------------|---------------------------------------------------------------------------------------------------------------------------------------------------------------------------------------------------------|--------------------------------------------------------------------------------------------------------------------------------------------------------------------------------------------------------------------------------------------------------------------------------------------------------------------------------------|
| Doñate-Martínez 2016 | Utility              | EQ-5D utility                                                | Cohort study                                                   | EQ-5D                              | 67.95 (11.14) - whole sample, not reported for COPD only                                                                                                                                                          | Spain         | outpatient                                                                           | 49 (66.22%)/25 (33.78%) - whole sample, not reported for COPD only                                                                                                                                | 74 (12 COPD patients)                                                                                                                                        | Random       | 74% ("dropout in the sample of 26 non-responders in the case of the EQ-5D tool and 27 for the satisfaction and usefulness perception's questionnaire" for the whole sample), not reported for COPD only | financing from the Agencia Valenciana de Salud of Ministry of Health of Valencia (2011) and from the Valencian Government through the project Prometeo-OpDepTec Fase II (Project reference: PROMETEUII/2014/074); A. Doñate-Martínez is supported by a predoctoral FPU fellowship of the Spanish Ministry of Education (AP2010-5354) |
| Downey 2009          | Uncategorized survey | End of life Priority Score                                   | Cross-sectional survey (9 - interview with quantitative survey | No description                     | (mean (SD))<br>1. Total COPD sample (n=156): 62.4 (13.4)<br>2. COPD patient sample (n=96): 66.7 (9.2)<br>3. COPD nonpatient sample (family member or friend from subset of the COPD patients) (n=60): 55.5 (16.0) | United States | Outpatient/hospitalized (not specified) for COPD patients; community for nonpatients | (% - female)<br>1. Total COPD sample (n=156): 45.5%<br>2. COPD patient sample (n=96): 28.1%<br>3. COPD nonpatient sample (family member or friend from subset of the COPD patients) (n=60): 73.3% | 1. Total COPD sample (n=156)<br>2. COPD patient sample (n=96)<br>3. COPD nonpatient sample (family member or friend from subset of the COPD patients) (n=60) | Not reported | NR                                                                                                                                                                                                      | National Institutes of Health, National Cancer Institute grant #5 R01 CA106204; an American Lung Association Career Investigator Award; the Robert Wood Johnson Foundation; and the Lotte & John Hecht Memorial Foundation.                                                                                                          |
| Downey 2013          | Uncategorized survey | Preference Rating (from 1 definitely no to 4 definitely yes) | Cross-sectional survey                                         | Booklet/card                       | 68.6 (9.6)                                                                                                                                                                                                        | USA           | primary                                                                              | male 100%                                                                                                                                                                                         | 196                                                                                                                                                          | Not reported | 93.00%                                                                                                                                                                                                  | Not reported                                                                                                                                                                                                                                                                                                                         |
| Dowson 2004          | Direct choice        | ranking: treatment                                           | Cross-sectional survey                                         | Narrative explained by interviewer | Mean (SD): 71.3 (7.2)                                                                                                                                                                                             | New Zealand   | inpatients                                                                           | 16/23                                                                                                                                                                                             | 39                                                                                                                                                           | Consecutive  | 83.0% 39/47                                                                                                                                                                                             | Not reported                                                                                                                                                                                                                                                                                                                         |

|               |                      |                                                               |                                         |                                                                                                                               |                                                                                             |                          |                                                                                             |                                                                                                                     |     |                  |        |                                                                                                                                                                                                                                                                                                                                         |
|---------------|----------------------|---------------------------------------------------------------|-----------------------------------------|-------------------------------------------------------------------------------------------------------------------------------|---------------------------------------------------------------------------------------------|--------------------------|---------------------------------------------------------------------------------------------|---------------------------------------------------------------------------------------------------------------------|-----|------------------|--------|-----------------------------------------------------------------------------------------------------------------------------------------------------------------------------------------------------------------------------------------------------------------------------------------------------------------------------------------|
| Eakin 1997    | Uncategorized survey | The perceived importance of COPD self-care on a 5-point scale | Cross-sectional survey                  | Narrative explained by interviewer Other: perceived importance of COPD self-care (1 = not important, 5 = extremely important) | 66.3 (10.6)                                                                                 | USA                      | research institute                                                                          | female 43.0%                                                                                                        | 65  | Voluntary sample | 70.00% | not reported                                                                                                                                                                                                                                                                                                                            |
| Egan 2012     | Utility              | EQ-5D                                                         | Trial, non-randomized or non-controlled | EQ-5D                                                                                                                         | NR                                                                                          | Ireland, the Netherlands | secondary                                                                                   | NR                                                                                                                  | 47  | Consecutive      | 72.00% | Not reported                                                                                                                                                                                                                                                                                                                            |
| Eskander 2011 | Utility              | EQ-5D, VAS, Standard gamble                                   | Cohort study                            | EQ-5D, Computer program or Software                                                                                           | BODE 0-4: 58 (7)<br>BODE 5-6: 57 (8)<br>BODE 7-10: 57 (8)                                   | Canada                   | outpatients at the Toronto General Hospital and St. Michael's Hospital in Toronto           | male/female: n, percentage<br>BODE 0-4: 7/2<br>78%/22%<br>BODE 5-6: 24/34<br>42%/58%<br>BODE 7-10: 28/32<br>47%/53% | 112 | Consecutive      | 93.30% | Governmental, Private not for profit/ Canadian Institutes of Health Research, Physicians of Ontario through the PSI Foundation, Canadian Lung Transplant Study Group, University of Toronto-Comprehensive Research Experience for Medical Students (CREMS) and the Nelson Arthur Hyland Foundation                                      |
| Farmer 2017   | Utility              | EQ-5D                                                         | Randomized controlled trial             | EQ-5D                                                                                                                         | mean (SD): 69.8 (9.1) in EDGE intervention group and 69.8 (10.6) in the standard care group | the UK                   | a variety of settings encompassing primary and secondary care as well as community services | 68/42 (61.8%/38.2%) in the EDGE intervention group and 34/22 (60.7%/39.3%) in the usual care group                  | 166 | voluntary sample |        | Governmental: This publication presents independent research supported from the Department of Health and Wellcome Trust through the Health Innovation Challenge (HIC) Fund commissioned by the Health Innovation Challenge Fund (HICF-1010-032), a parallel funding partnership between the Wellcome Trust and the Department of Health |
| Ferreira 2014 | Utility              | EQ-5D, and SF-6D                                              | Cross-sectional survey                  | EQ-5D, SF-12/SF-36                                                                                                            | 68.6 (9.5)                                                                                  | Portugal                 | secondary                                                                                   | Female 2.8%                                                                                                         | 72  | Consecutive      | NR     | not reported                                                                                                                                                                                                                                                                                                                            |



|               |               |                          |                        |                                                                                |                                                                         |                                        |                            |                |      |              |                                                |                                                                                                                                                                                                                                                                                                                                                        |
|---------------|---------------|--------------------------|------------------------|--------------------------------------------------------------------------------|-------------------------------------------------------------------------|----------------------------------------|----------------------------|----------------|------|--------------|------------------------------------------------|--------------------------------------------------------------------------------------------------------------------------------------------------------------------------------------------------------------------------------------------------------------------------------------------------------------------------------------------------------|
| Fishwick 2014 | Utility       | EQ-5D                    | Cross-sectional survey | EQ-5D                                                                          | 69.4 (8.2)                                                              | UK                                     | primary, community care    | male 92 (62.2) | 148  | Random       | NR                                             | not reported                                                                                                                                                                                                                                                                                                                                           |
| Fletcher 2011 | Utility       | EQ-5D, VAS               | Cross-sectional survey | EQ-5D                                                                          | number [percentage]: 45-54: 1029 [42]; 55-64: 971 [40]; 65-67: 426 [18] | Brazil, China, Germany, Turkey, US, UK | community                  | male 49%       | 2426 | Random       | 80% of those eligible and willing to take part | not reported                                                                                                                                                                                                                                                                                                                                           |
| Fox 1999      | Direct choice | Forced choice: treatment | Cross-sectional survey | Narrative explained by interviewer                                             | nr                                                                      | USA                                    | hospitalized               | nr             | 1016 | Consecutive  | 89% (11% died)                                 | Robert Wood Johnson Foundation                                                                                                                                                                                                                                                                                                                         |
| Fried 2002    | Direct choice | Probability trade off    | Cross-sectional survey | Narrative explained by interviewer, Pictorial descriptions of risk (pictogram) | 72.2±7.0                                                                | USA                                    | inpatients and outpatients | male 49%       | 81   | Consecutive  | 82% participation rate                         | not reported                                                                                                                                                                                                                                                                                                                                           |
| Fried 2007    | Direct choice | Probability trade off    | Repeated surveys       | Narrative explained by interviewer, Pictorial descriptions of risk (pictogram) | NR for COPD                                                             | USA                                    | hospitalized               | NR for COPD    | 64   | Consecutive  | 81% participation rate                         | grants from the Department of Veterans Affairs Health Services Research and Development Service, from the National Institute on Aging (NIA), from the Claude D. Pepper Older Americans Independence Center at Yale and a Paul Beeson Physician Faculty Scholars Award, from the National Institute of Arthritis and Musculoskeletal and Skin Diseases. |
| Gaber 2004    | Direct choice | Forced choice: treatment | Repeated surveys       | Narrative explained by interviewer                                             | Mean (range) 74.1 (48-92)                                               | UK                                     | outpatients                | 41/59          | 100  | Not reported | Not reported                                   | not reported                                                                                                                                                                                                                                                                                                                                           |

|                      |         |            |                             |                                           |                                                                                                                                                                      |         |                                                                                      |                                                                                                                                                                                                              |                  |                                         |                                                                                              |                                                                                                                                                                                        |
|----------------------|---------|------------|-----------------------------|-------------------------------------------|----------------------------------------------------------------------------------------------------------------------------------------------------------------------|---------|--------------------------------------------------------------------------------------|--------------------------------------------------------------------------------------------------------------------------------------------------------------------------------------------------------------|------------------|-----------------------------------------|----------------------------------------------------------------------------------------------|----------------------------------------------------------------------------------------------------------------------------------------------------------------------------------------|
| Galaznik 2013        | Utility | SF-6D      | Cross-sectional survey      | SF-12/SF-36                               | Current smokers (n = 1685) 57.18 (9.66)<br>Quit 0–5 years (n = 923) 61.74 (9.88)<br>Quit 6–10 years (n = 649) 64.19 (9.21)<br>Quit >11 years (n = 1932) 66.71 (9.30) | USA     | self-report of a physician diagnosis of COPD in a random population of adults in USA | Current smokers (n = 1685): 689/996 (40.9%/59.1%)<br>Quit 0–5 years (n = 923): 458/465 (49.6%/50.4%)<br>Quit 6–10 years (n = 649): 332/317 (51.2%/48.8%)<br>Quit >11 years (n = 1932): 996/936 (51.6%/48.4%) | 5189             | Random                                  | unclear                                                                                      | Pfizer, Inc                                                                                                                                                                            |
| Garcia-Gordillo 2017 | Utility | EQ-5D, VAS | Cross-sectional study       | EQ-5D                                     | Age group: n (%)<br>15-39: 129 (11.42%)<br>40-65: 397 (35.13%)<br>66-102: 604 (53.45%)                                                                               | Spain   | general population (COPD subsample)                                                  | 550/580 (48.67%/51.33%)                                                                                                                                                                                      | 1130             | Diagnosed patients from a random sample | not reported                                                                                 | The author DCM was supported by a grant from the Spanish Ministry of Education, Culture and Sport (FPU14/01283).                                                                       |
| García-Polo 2012     | Utility | EQ-5D, VAS | cross-sectional survey      | Narrative explained by interviewer, EQ-5D | Mean (SD) 66.9 (8.7)                                                                                                                                                 | Spain   | Not reported                                                                         | 107/8                                                                                                                                                                                                        | 115              | Consecutive                             | 137 patients were recruited and 115 completed the necessary data to be included in the study | not reported                                                                                                                                                                           |
| Gillespie 2013       | Utility | EQ-5D      | Randomized controlled trial | EQ-5D                                     | Unclear                                                                                                                                                              | Ireland | general practices                                                                    | unclear                                                                                                                                                                                                      | 350              | Not reported                            | Not reported                                                                                 | Governmental and Private for Profit/ This project was funded by the Health Research Board of Ireland (grant number NMRPS/07/01) and by an unconditional educational grant from Pfizer. |
| Goossens 2011        | Utility | EQ-5D, VAS | Cohort study                | EQ-5D                                     | Mean age 61.1 (10.4)                                                                                                                                                 | USA     | outpatients                                                                          | 67.8%/32.2%, 40/19                                                                                                                                                                                           | 59 (65 in total) | Not reported                            | unclear how many participants sought, 65 enrolled and 59 followed. 90.8%                     | Governmental/Netherlands Organisation for Health Research and Development                                                                                                              |

|                  |               |                                                                |                             |                                                 |                                                                                       |                                                                |                                                                                                                                                          |                                                                                             |                                                             |                                 |                                                                                      |                                                                                                                                                                                                           |
|------------------|---------------|----------------------------------------------------------------|-----------------------------|-------------------------------------------------|---------------------------------------------------------------------------------------|----------------------------------------------------------------|----------------------------------------------------------------------------------------------------------------------------------------------------------|---------------------------------------------------------------------------------------------|-------------------------------------------------------------|---------------------------------|--------------------------------------------------------------------------------------|-----------------------------------------------------------------------------------------------------------------------------------------------------------------------------------------------------------|
| Goossens 2014    | Direct choice | Willingness to pay, Conjoint analysis/Discrete choice analysis | Cross-sectional survey      | Other: Discrete choice experiment questionnaire | Mean 68.1                                                                             | Neitherland                                                    | inpatient (hospitalization as usual vs early discharge)                                                                                                  | 66/41<br>62%/38%                                                                            | 107                                                         | Other: Trial based              | 77.0% 107 of 139                                                                     | Governmental/<br>Netherlands<br>Organisation for<br>Health Research<br>and Development                                                                                                                    |
| Gruenberger 2017 | Utility       | SF-6D utility                                                  | Cross-sectional study       | SF-6D                                           | Mean (SD)<br>lower dyspnea<br>61.39<br>(9.78)<br>Higher dyspnea<br>62.65(9.03)        | France,<br>Germany,<br>Italy,<br>Spain, UK<br>(5EU) and<br>USA | outpatient                                                                                                                                               | lower<br>dyspnea<br>58.9%/41.1<br>%<br>Higher<br>dyspnea<br>57.6%/42.4<br>%                 | lower<br>dyspnea<br>(n=523)<br>Higher<br>dyspnea<br>(n=245) | Online<br>survey<br>respondents | USA: 13,53%; SEU<br>2011 period: 19,69%;<br>SEU 2013 period:<br>15,95                | AstraZeneca                                                                                                                                                                                               |
| Guyatt 1999      | Utility       | Standard gamble, QWB                                           | Randomized controlled trial | Decision board, Quality of Well-Being           | Mean (SD)<br>66 (7)                                                                   | Canada                                                         | rehabilitation or conventional community care                                                                                                            | 44/45<br>49.4%/50.6<br>%                                                                    | 89                                                          | Consecutive                     | 70.6% (89/126); and<br>for the follow up,<br>87.6% finished the<br>follow up (78/89) | Governmental and<br>Private not for<br>profit/ West Park<br>Hospital<br>Foundation, Ontario<br>Ministry of Health<br>grant 02196, and<br>the Respiratory<br>Health Network of<br>Centres of<br>Excellence |
| Gvozdenovic 2007 | Utility       | 15D                                                            | Cross-sectional survey      | Narrative explained by interviewer              | Mean (SD)<br>58 (12)                                                                  | Serbia                                                         | outpatients                                                                                                                                              | 46/39                                                                                       | 85                                                          | Not reported                    |                                                                                      | not reported                                                                                                                                                                                              |
| Hanada 2015      | Direct choice | Forced choice: treatment                                       | Repeated surveys            | no description                                  | First<br>survey:<br>73.6 (7.1)<br>range: 53-<br>87<br>Second<br>survey:<br>73.1 (7.3) | Japan                                                          | Department of Respiratory Medicine and Allergology at Nara Hospital, Kinki University Faculty of Medicine, Ikoma, Japan between August 2010 and May 2011 | First<br>survey:<br>52/5,<br>91.2%/8.8<br>%<br>Second<br>survey:<br>37/2,<br>94.9%/5.1<br>% | First<br>survey: 57<br>Second<br>survey: 39                 | Not reported                    | Not reported                                                                         | Private/<br>Department of<br>Respiratory<br>Medicine and<br>Allergology, Nara<br>Hospital, Kinki<br>University Faculty<br>of Medicine                                                                     |

|                |                        |                                                                |                                                        |                                                  |                                       |                                           |             |                                   |     |                    |                                                                                                                                      |                                                                           |
|----------------|------------------------|----------------------------------------------------------------|--------------------------------------------------------|--------------------------------------------------|---------------------------------------|-------------------------------------------|-------------|-----------------------------------|-----|--------------------|--------------------------------------------------------------------------------------------------------------------------------------|---------------------------------------------------------------------------|
| Hansen 1990    | Direct choice          | Forced choice: treatment                                       | Randomized controlled trial                            | no description                                   | Mean (range) 66 (45-83)               | Denmark                                   | outpatients | 24/24                             | 48  | Random             |                                                                                                                                      | not reported                                                              |
| Hansen 1994    | Utility, Direct choice | VAS, Forced choice: inhaler                                    | Trial, non-randomized or non-controlled                | no description                                   | Mean (range) 66 (54-81)               | Denmark                                   | outpatients |                                   | 25  | Random             |                                                                                                                                      | not reported                                                              |
| Harper 1997    | Utility                | VAS                                                            | Cross-sectional survey                                 | EQ-5D                                            | Mean (SD) 67 (10,4)                   | UK                                        | outpatients | 76/80                             | 156 | Not reported       | First follow-up 128 patients                                                                                                         | not reported                                                              |
| Haughney 2005  | Direct choice          | Conjoint analysis/Discrete choice analysis                     | Cross-sectional survey (A fractional factorial design) | Booklet/card                                     | 66                                    | France, Germany, Spain, Sweden and the UK | outpatients | 82/43                             | 125 | Consecutive        | Not reported                                                                                                                         | not reported                                                              |
| Hawken 2017    | Direct choice          | Conjoint analysis/Discrete choice analysis, willingness to pay | Cross-sectional study                                  | Other: Discrete choice experiment questionnaire  | Mean (SD): 48.48 (15.16)              | France                                    | unclear     | 42/51 (45.16%/54.84%)             | 93  | convenience sample | not reported                                                                                                                         | private for profit: This study was sponsored by Teva Pharmaceuticals Inc. |
| Hernández 2013 | Uncategorized survey   | Impact of shortness of breath                                  | Cross-sectional survey                                 | Narrative explained by interviewer, Booklet/card | Mean 68,7                             | Canada                                    | outpatients | 491/440                           | 931 | Consecutive        |                                                                                                                                      | not reported                                                              |
| Heyworth 2009  | Utility                | EQ-5D, VAS                                                     | Cross-sectional survey                                 | EQ-5D                                            | Age not reported exclusively for COPD | UK                                        | outpatients | Not reported exclusively for COPD | 280 | Not reported       |                                                                                                                                      | not reported                                                              |
| Hohmeier 2016  | Direct choice          | patient perception survey                                      | Cohort study                                           | No description                                   | 64 years (range 42-76 years)          | USA                                       | outpatient  | Male: 5/ female: 7                | 12  | not reported       | 55% (of the 22 individuals who were identified by study personnel as eligible to participate in the survey, 12 completed the survey) | not reported                                                              |

|                  |                      |                          |                             |                 |                                                                                    |             |                                |                                                 |                                                               |                                            |                                                                                                                                                                                                                                                                                                                                                                                                                                                                                                                                                                                                                                 |                                                |
|------------------|----------------------|--------------------------|-----------------------------|-----------------|------------------------------------------------------------------------------------|-------------|--------------------------------|-------------------------------------------------|---------------------------------------------------------------|--------------------------------------------|---------------------------------------------------------------------------------------------------------------------------------------------------------------------------------------------------------------------------------------------------------------------------------------------------------------------------------------------------------------------------------------------------------------------------------------------------------------------------------------------------------------------------------------------------------------------------------------------------------------------------------|------------------------------------------------|
| Hong 2015        | Utility              | VAS, EQ-5D utility       | Cross-sectional study       | EQ-5D           | Mean (SD) 63.7 (9.5)                                                               | South Korea | outpatient                     | 817 (69%) /361 (31%)                            | 1178 (mild COPD = 497, moderate COPD = 612, severe COPD = 69) | stratified multistage probability sampling | not reported (among the 33,829 subjects who completed the questionnaire and underwent the medical examination in the national survey from 2007 to 2010, 16,703 were aged <math>C_{40}</math> years and 12,562 performed PFT. Of these, 9789 performed acceptable and reproducible spirometry; 1188 subjects with a restrictive spirometry pattern and 31 subjects without EQ-5D scores were excluded. Among the 8570 subjects, there were 7301 non-COPD subjects and 1269 COPD subjects. After an age- and sex-matching process, 1178 subjects in both the COPD and non-COPD groups were selected and compared in the analysis) | not reported                                   |
| Hoogendoorn 2010 | Utility              | EQ-5D                    | Randomized controlled trial | EQ-5D           | Mean (SD) Intercom 66 (9); Usual care 67 (9)                                       | Netherlands | outpatient                     | Intercom 30/72, 29%, 71%; Control 28/69 29%/71% | 199                                                           | Not reported                               | Unclear, of the 199 participants, 158 completed the 2-yr study period. 79% Governmental and Private for profit/ the Netherlands Asthma Foundation (NAF; 3.4.01.63; Leusden, the Netherlands), the "Stichting Astma Bestrijding" (SAB; Amsterdam, the Netherlands), Nutricia Netherlands and Pfizer and Partners in Care Solutions (PICASSO) for COPD (Capelle aan den IJssel, the Netherlands)                                                                                                                                                                                                                                  |                                                |
| Hoyle 2016       | Utility              | CAT mapping              | Randomized                  | COPD assessment | Mean (SD) Male: 64.5                                                               | USA, France | not reported                   | 68.8%/31.2%                                     | 1658                                                          | not reported                               | 80.1% during follow up (1447 in visit 1, 1241 in visit 2, 1658                                                                                                                                                                                                                                                                                                                                                                                                                                                                                                                                                                  | Funding for this study, the development of the |
| Hwang 2011       | Direct choice        | Forced choice: treatment | Cross-sectional survey      | no description  | Age group: Percentage 40~49: 2.3% 50~59: 13.3% 60~69: 35.3% 70~79: 40.0% ≥80: 9.0% | Korean      | university-affiliated hospital | 256/44 85.3%/14.7%                              | 300                                                           | Unclear                                    | unclear                                                                                                                                                                                                                                                                                                                                                                                                                                                                                                                                                                                                                         | not reported                                   |
| Hyland 2016      | Uncategorized survey | ranking: treatment       | Cross-sectional study       | Verbal          | 67 years (range 47-84)                                                             | UK          | Inpatient                      | 7 (35%)/13 (65%)                                | 20                                                            | not reported                               | not reported                                                                                                                                                                                                                                                                                                                                                                                                                                                                                                                                                                                                                    | Royal Devon & Exeter NHS Foundation Trust      |

|               |               |                       |                             |                                                    |                                                                                                                                                                                                                                                                                                                                                                   |             |            |                                                                                                                                                                             |                                  |              |                                                                                                                                                                                          |                                                                                                                                                                                                                                                         |
|---------------|---------------|-----------------------|-----------------------------|----------------------------------------------------|-------------------------------------------------------------------------------------------------------------------------------------------------------------------------------------------------------------------------------------------------------------------------------------------------------------------------------------------------------------------|-------------|------------|-----------------------------------------------------------------------------------------------------------------------------------------------------------------------------|----------------------------------|--------------|------------------------------------------------------------------------------------------------------------------------------------------------------------------------------------------|---------------------------------------------------------------------------------------------------------------------------------------------------------------------------------------------------------------------------------------------------------|
| Jakobsen 2015 | Utility       | VAS, EQ-5D utility    | Randomized controlled trial | EQ-5D                                              | 5 patients <60 years in control group<br>5 patients <60 years in intervention group<br>8 patients 60-70 years in control group<br>8 patients 60-70 years in intervention group<br>9 patients 70-80 years in control group<br>10 patients 70-80 years in intervention group<br>6 patients >80 years in control group<br>6 patients >80 years in intervention group | Denmark     | Inpatient  | [n (%) of females:<br>control (n=28) - 17 (60.7);<br>intervention (n=29) - 18 (62.1);<br>[n (%) of males:<br>control (n=28) - 11 (39.3);<br>intervention (n=29) - 11 (37.9) | 57 (28 control, 29 intervention) | Consecutive  | 49.1% (57/116) (646 assessed for eligibility, 116 met criteria, 59 declined to participate; of the 57 who were randomized 15 were lost to follow-up (8 unavailable for contact, 7 died)) | The Philanthropic Foundation TrygFonden (grant 7561-08), The Health Insurance Foundation (grant 2011B003), The Danish Lung Association, The Toyota Foundation (grant OH/BG 7003), The Frederiksberg Foundation (grant 2010-88), and a Lykfeldt's grant. |
| Janssen 2011  | Utility       | EQ-5D, VAS            | Cross-sectional survey      | EQ-5D                                              | Mean (SD) 66.3 (9.2)                                                                                                                                                                                                                                                                                                                                              | Netherlands | outpatient | 65/40, 61.9%/38.1%                                                                                                                                                          | 105                              | Not reported | Not reported                                                                                                                                                                             | Governmental/Proteion Thuis, Horn, The Netherlands; CRO+, Horn, The Netherlands; Grant 3.4.06.082 of the Netherlands Asthma Foundation, Leusden, The Netherlands; Stichting Wetenschapsbevoordering Verpleeghuiszorg (SWBV), Utrecht, The Netherlands.  |
| Janssen 2011b | Direct choice | Probability trade off | Cross-sectional survey      | Other: questionnaire with description of scenarios | Mean (SD) 66.3 (9.2)                                                                                                                                                                                                                                                                                                                                              | Netherlands | outpatient | 65/40, 61.9%/38.1%                                                                                                                                                          | 105                              | Not reported | not reported                                                                                                                                                                             | not reported                                                                                                                                                                                                                                            |

|               |               |                          |                                                 |                                    |                                                        |           |             |                                                                      |                                         |                       |              |                                                                                                                                                                                                                                                                                                                                                                                                                                                                                                                                                                                                                                                                                                               |
|---------------|---------------|--------------------------|-------------------------------------------------|------------------------------------|--------------------------------------------------------|-----------|-------------|----------------------------------------------------------------------|-----------------------------------------|-----------------------|--------------|---------------------------------------------------------------------------------------------------------------------------------------------------------------------------------------------------------------------------------------------------------------------------------------------------------------------------------------------------------------------------------------------------------------------------------------------------------------------------------------------------------------------------------------------------------------------------------------------------------------------------------------------------------------------------------------------------------------|
| Janssen 2011c | Direct choice | Forced choice: treatment | Cross-sectional survey                          | no description                     | Dutch patients: 66.7 (9.3)<br>US patients: 68.7 (10.0) | Dutch, US | outpatient  | Dutch patients: 75/47, 61.5%/38.5%<br>US patients: 360/31 92.1%/7.9% | Dutch patients: 122<br>US patients: 391 | Consecutive and other | not reported | This project was part of an international research fellowship supported by CRO+ (Centre of Expertise for Chronic Organ Failure, Horn, the Netherlands). The original Dutch study was supported by: Proteion Thisis (Horn, the Netherlands); CRO+; grant 3.4.06.082 from the Netherlands Asthma Foundation (Leusden, the Netherlands); and Stichting Wetenschapsbevordering Verpleeghuiszorg (Utrecht, The Netherlands). The original US studies were supported by the Health Services Research and Development, Dept of Veterans Affairs (grant IIR 02-292) and the American Lung Association. J.R. Curtis was funded by a K24 Award from the National Heart, Lung, and Blood Institute (grant K24 HL068593). |
| Janssen 2014  | Utility       | EQ-5D                    | Cohort study (baseline information of a cohort) | EQ-5D                              | 66.3 (9.2)                                             | Dutch     | outpatient  | 65/40<br>61.9%/38.1%                                                 | 105                                     | convenience sample    | not reported | Proteion Thisis, Horn, The Netherlands; CRO+, Center of Expertise for Chronic Organ Failure, Horn, The Netherlands; The Netherlands Lung Foundation, Leusden, The Netherlands (Grant number 3.4.06.082); The Weijerhorst Foundation, Maastricht, The Netherlands; and Stichting Wetenschapsbevordering Verpleeghuiszorg (SWBV), Utrecht, The Netherlands.                                                                                                                                                                                                                                                                                                                                                     |
| Jarvis 2007   | Direct choice | Forced choice: inhaler   | Cross-sectional survey                          | Narrative explained by interviewer | Mean (range) 73,5 (65-89)                              | UK        | outpatients | 36/17                                                                | 53                                      | Random                | not reported |                                                                                                                                                                                                                                                                                                                                                                                                                                                                                                                                                                                                                                                                                                               |

|                |                      |                                                                |                                                            |                                                                                              |                                                                                |                                                |                                                                  |                                                                           |     |                                                        |                                                                                                         |              |
|----------------|----------------------|----------------------------------------------------------------|------------------------------------------------------------|----------------------------------------------------------------------------------------------|--------------------------------------------------------------------------------|------------------------------------------------|------------------------------------------------------------------|---------------------------------------------------------------------------|-----|--------------------------------------------------------|---------------------------------------------------------------------------------------------------------|--------------|
| Jia 2016       | Utility              | EQ-5D utility                                                  | Cross-sectional study                                      | EQ-5D                                                                                        | age 65 years and older (not reported for COPD only)                            | USA                                            | general population (COPD subsample)                              | not reported for COPD only                                                | 140 | random                                                 | not reported                                                                                            | not reported |
| Jordan 2014    | Direct choice        | Forced choice: Preferences of Information                      | Cross-sectional survey                                     | Other: questionnaires on patient preference regarding information desired from their doctors | Mean (SD) 60 (1.16)                                                            | Argentina                                      | outpatient                                                       | 19/25<br>43.2%/56.8%                                                      | 44  | Random                                                 | unclear                                                                                                 | not reported |
| Katajisto 2012 | Utility              | 15D                                                            | Cross-sectional survey (cross-sectional study in a cohort) | Other: 15 D questionnaire                                                                    | Mean 63.4 (7.0)                                                                | Finland                                        | both inpatient and outpatient                                    | 419/280<br>60%/40%                                                        | 719 | Other: Cohort based sampling (all cohort participants) | 87% (719/827)                                                                                           | not reported |
| Katula 2004    | Uncategorized survey | physical function and perceived importance items               | Randomized controlled trial                                | Other: questionnaire                                                                         | Mean/95% CI short term group 66.9(65.5-68.3), long-term group 68.4 (67.0-69.8) | USA                                            | outpatient                                                       | short term group: 39/31, 55.7%, 44.3%; long term group: 39/31, 55.7/44.3% | 142 | Consecutive                                            | 84.3% 118/140 completed the study                                                                       | not reported |
| Kawata 2014    | Direct choice,       | Willingness to pay, Conjoint analysis/Discrete choice analysis | Cross-sectional survey                                     | decision aid on the Discrete Choice Experiment Questionnaires                                | Mean (SD) 62.3 (9.99); Range 40-88                                             |                                                | Unclear / reached through emails to patients diagnosed with COPD | 230/285<br>44.66%<br>55.34%                                               | 515 | Other: voluntary online survey                         | 57% responses (n=2930); 24% eligible; while the majority of these 74% (n=515, 74%) completed the survey | not reported |
| Kessler 2006   | Uncategorized survey | Impact of exacerbation                                         | Cross-sectional survey                                     | Narrative explained by interviewer                                                           | Mean (SD) 664, (8,5)                                                           | France, Germany, Spain, Sweden and UK (Europe) | outpatients                                                      | 82/43                                                                     | 125 | Consecutive                                            |                                                                                                         | not reported |



|                          |         |                   |                             |                         |                                                                                                                                 |             |                                            |                                                                                    |                                                                    |                         |                          |                 |
|--------------------------|---------|-------------------|-----------------------------|-------------------------|---------------------------------------------------------------------------------------------------------------------------------|-------------|--------------------------------------------|------------------------------------------------------------------------------------|--------------------------------------------------------------------|-------------------------|--------------------------|-----------------|
| Khmour 2011              | Utility | EQ-5D             | Randomized controlled trial | EQ-5D                   | Mean (SD) education self-management 66.2 (9.8); usual care 66.6 (9.1)                                                           | UK          | outpatient                                 | Education self-management group 27/37 42.2%/57.8%; Usual care group 28/35, 45%/55% | 127: 64 in education self-management group, 63 in usual care group | Consecutive             | 73.4% (127/173)          | not reported    |
| Kim 2014                 | Utility | EQ-5D, VAS        | Cross-sectional survey      | EQ-5D                   | Mean (SD) 68.5 (9.1); Number (proportion): less than 60, 25 (12.5%); 60-69, 74 (37.0%); 70-79, 85 (42.5%), 80 and more, 16 (8%) | Korea       | outpatient                                 | 183/17 (91.5% / 8.5%)                                                              | 200                                                                | Consecutive             | Not reported             | not reported    |
| Kim 2015                 | Utility | EQ-5D utility     | Cross-sectional study       | EQ-5D                   | age for male 19-64: 49.3%, 65- : 50.7%; age for female 19-64: 37.5%, and 65- : 62.5%                                            | South Korea | general population (COPD subsample)        | 556/195                                                                            | 751                                                                | rolling survey sampling | not reported             | not reported    |
| Koehorst-ter Huurne 2016 | Utility | VAS               | Cohort study                | EQ-5D                   | ICS users - 67.1 (9.7); Tiotropium users - 65.5 (9.7)                                                                           | Netherlands | both hospitalized patients and outpatients | 377/258 ICS, 269/169 tiotropium                                                    | 795 (635 ICS, 438 tiotropium)                                      | consecutive             | not reported             | GlaxoSmithKline |
| Kontodimos 2012          | Utility | EQ-5D, SF-6D, 15D | Cross-sectional survey      | EQ-5D, SF-6D and SF-15D | unclear                                                                                                                         | Greece      | Outpatients                                |                                                                                    | 29                                                                 | Consecutive             | unclear (319 out of 354) | Not reported    |
| Koskela 2014             | Utility | 15D               | Cohort study                | 15D                     | Mean (SD): 64 (7)                                                                                                               | Finland     | All patients with COPD                     | 473/266 (64%/36%)                                                                  | 739                                                                | Other: consecutive      | Not reported             | not reported    |
| Koskela 2014b            | Utility | 15D               | Cohort study                | 15D                     | Mean (SD): 64 (7)                                                                                                               | Finland     | All patients with COPD                     | 473/266 (64%/36%)                                                                  | 739                                                                | Other: consecutive      | Not reported             | not reported    |

|              |                      |                          |                             |                |                                                                                     |                           |                                                                |                                                                                            |                                    |                                            |                                                                                                                                                                                     |                                                                                                                                                                                                                                                                          |
|--------------|----------------------|--------------------------|-----------------------------|----------------|-------------------------------------------------------------------------------------|---------------------------|----------------------------------------------------------------|--------------------------------------------------------------------------------------------|------------------------------------|--------------------------------------------|-------------------------------------------------------------------------------------------------------------------------------------------------------------------------------------|--------------------------------------------------------------------------------------------------------------------------------------------------------------------------------------------------------------------------------------------------------------------------|
| Kotz 2009    | Utility              | EQ-5D                    | Randomized controlled trial | EQ-5D          | Mean (SD): 53.7 (7.0) in the experimental group and 54.9 (8.0) in the control group | Dutch and Belgian Limburg | primary care                                                   | 71/45 (61.2%/38.8%) in the experimental group and 74/38 (66.1%/33.9%) in the control group | 228                                | Consecutive                                | unclear                                                                                                                                                                             | University/Education: University Maastricht (UM), CAPRI Research Institute (The Netherlands)                                                                                                                                                                             |
| Kruis 2013   | Utility              | EQ-5D, VAS               | Randomized controlled trial | EQ-5D          | 68.3 (11.2)                                                                         | Netherlands               | general practices                                              | 585/501 (53.9%/46.1%)                                                                      | 1086                               | Consecutive                                | unclear                                                                                                                                                                             | Governmental and Private for profit/ Netherlands Organisation for Health Research and Development (Zon-MW), subprogram Effects & Costs (project number 171002203), and Stichting Achmea, a Dutch Healthcare insurance company                                            |
| Kuyucu 2011  | Uncategorized survey | Expectation of treatment | Cross-sectional survey      | No description | (mean (SD) (range)): 64.1 (9.5) (41-92)                                             | Turkey                    | Secondary and tertiary care centres; primary physician offices | 91% male; 9% female                                                                        | 514                                | Not reported                               | NR                                                                                                                                                                                  | Astra-Zeneca Turkey                                                                                                                                                                                                                                                      |
| Kwon 2016    | Utility              | EQ-5D utility            | Cross-sectional study       | EQ-5D          | 60.37 (SE 0.34)                                                                     | South Korea               | general population (COPD subsample)                            | 72.36% (SE 0.12) males                                                                     | 2734 with COPD                     | stratified multistage probability sampling | not reported                                                                                                                                                                        | no external funding sources for the study                                                                                                                                                                                                                                |
| Lacasse 2015 | Utility              | SF-6D utility            | Cross-sectional             | SF-6D          | 71 (7) - cases; 68 (8) - controls                                                   | Canada                    | outpatient                                                     | 42 (62%) - male cases; 84 (62%) - male controls                                            | Cases (n = 68); Controls (n = 136) | not reported                               | One hundred and seventy-six (176) patients with oxygen-dependent COPD were registered at the Quebec City area respiratory home care program. Of those, 74 did not fill in the SF-36 | Groupe de recherche en santé respiratoire de l'Université Laval (GESER)                                                                                                                                                                                                  |
| Lemmens 2008 | Utility              | VAS                      | Cross-sectional survey      | EQ-5D          | Mean (SD) 63 (11)                                                                   | Neitherland               | general practice / home care                                   | 156/122 56%/44%                                                                            | 278                                | Not reported                               | Not reported                                                                                                                                                                        | Private for profit and Private not for profit /an unrestricted grant from PICASSO for COPD, an initiative of Pfizer B.V. and Boehringer Ingelheim B.V. in cooperation with research institute Capri (Care and Public Health Research Institute) of Maastricht University |

|              |               |                          |                                         |                |                                                                                                                                                                               |                   |                                                                        |                                                                                                                                                             |                                                 |                     |                   |                                                                                                                                                                                                                                                                            |
|--------------|---------------|--------------------------|-----------------------------------------|----------------|-------------------------------------------------------------------------------------------------------------------------------------------------------------------------------|-------------------|------------------------------------------------------------------------|-------------------------------------------------------------------------------------------------------------------------------------------------------------|-------------------------------------------------|---------------------|-------------------|----------------------------------------------------------------------------------------------------------------------------------------------------------------------------------------------------------------------------------------------------------------------------|
| Lemmens 2010 | Utility       | VAS                      | Trial, non-randomized or non-controlled | EQ-5D          | Mean (SD) 66 (11)                                                                                                                                                             | Neitherland       | general practice / home care                                           | 122/67<br>65%/35%                                                                                                                                           | 189                                             | Not reported        | 79.4% 150/189     | Private for profit and Private not for profit / an unrestricted grant from PICASSO for COPD, an initiative of Pfizer B.V. and Boehringer Ingelheim B.V. in cooperation with research institute Caphri (Care and Public Health Research Institute) of Maastricht University |
| Lewis 2010   | Utility       | EQ-5D                    | Randomized controlled trial             | EQ-5D          | median interquartile range telemonitoring group 70 (61, 73); control 73 (63, 79)                                                                                              | UK                | outpatient                                                             | in both group: 10/10 50%/50%                                                                                                                                | 40                                              | Consecutive         | 51.9% 40/77       | Governmental/ EU grant (C046225)                                                                                                                                                                                                                                           |
| Lin 2014     | Utility       | EQ-5D, VAS               | Cross-sectional survey                  | EQ-5D          | Mean (SD) Total sample 68.5 (10.4);                                                                                                                                           | USA (seven sites) | Not reported                                                           | 387/283 57.8%/42.2 %                                                                                                                                        | 670                                             | Random              | 26.2% (1293/4935) | Governmental/National Heart, Lung, and Blood Institute (NHLBI RC2 HL101618).                                                                                                                                                                                               |
| Lynn 2000    | Direct choice | Forced choice: treatment | Cohort study                            | no description | Median (25th, 75th percentile) Died during index hospitalization (n=116) 73 (68, 80) Died after index hospitalization (n=300) 72 (66, 79) Alive at 1 year (n=600) 69 (61, 76) | USA               | Hospitalization for exacerbation of COPD at five US teaching hospitals | Died during index hospitalization (n=116) 64/52, 55%/45% Died after index hospitalization (n=300) 150/150, 50%/50% Alive at 1 year (n=600) 309/291, 52%/48% | 416 died among 1016 enrolled                    | Other: cohort based | unclear           | SUPPORT was made possible by grants from the Robert Wood Johnson Foundation. Dr. Claessens was supported by a Veterans Administration Ambulatory Care Fellowship, White River Junction, Vermont, and a Fellowship in Palliative Medicine, Ottawa, Ontario.                 |
| Mahler 2014  | Direct choice | Forced choice: treatment | Randomized controlled trial             | no description | 71.6 (7.4)                                                                                                                                                                    | UK                | unclear                                                                | 5/15 25%/75%                                                                                                                                                | 20                                              | Not reported        | unclear           | Boehringer Ingelheim, GlaxoSmithKline, Novartis, and Sunovion                                                                                                                                                                                                              |
| Manca 2014   | Utility       | VAS, EQ-5D utility       | Cross-sectional study                   | EQ-5D          | AATD COPD - 56.5 (10.6); Non-AATD COPD - 70.3 (9.2)                                                                                                                           | Spain             | not reported                                                           | AATD COPD - 57.1% males; Non-AATD COPD - 80.3% males                                                                                                        | 96 (35 were AATD patients and 61 non-AATD COPD) | not reported        | not reported      | Grifols                                                                                                                                                                                                                                                                    |

|                      |                        |                                              |                             |                                                          |                                                                            |                  |                                |                                                                            |     |              |                                                                                                   |                                                                                                                                                                                                                                                                                      |
|----------------------|------------------------|----------------------------------------------|-----------------------------|----------------------------------------------------------|----------------------------------------------------------------------------|------------------|--------------------------------|----------------------------------------------------------------------------|-----|--------------|---------------------------------------------------------------------------------------------------|--------------------------------------------------------------------------------------------------------------------------------------------------------------------------------------------------------------------------------------------------------------------------------------|
| Martínez 2012        | Direct choice          | Forced choice: treatment                     | Cross-sectional survey      | Narrative explained by interviewer, Booklet/card         | Males Mean (SD) at time of survey 73,1 (8,3)                               | USA              | outpatients                    | 273/295                                                                    | 568 | Random       | not reported                                                                                      |                                                                                                                                                                                                                                                                                      |
| Martinez Rivera 2016 | Utility                | VAS, EQ-5D utility                           | Cross-sectional study       | EQ-5D                                                    | 66.9 (8.8)                                                                 | Spain            | outpatient                     | 93%/7%                                                                     | 115 | consecutive  | not reported                                                                                      | No data provided.                                                                                                                                                                                                                                                                    |
| McDowell 2015        | Utility, Direct choice | VAS, EQ-5D utility, forced choice: treatment | Randomized controlled trial | EQ-5D                                                    | Telemonitoring with usual care: 69.8 (SD: 7.1); Usual care: 70.2 (SD: 7.4) | Northern Ireland | patients treated at home       | Telemonitoring with usual care: 58.2% females<br>Usual care: 54.5% females | 110 | consecutive  | 94.0% (117 assessed for eligibility and 110 recruited); 90.9% (110 recruited/ 100 finished study) | The study was funded by a grant from the European Centre for Connected Health. The researchers were independent from the funders.                                                                                                                                                    |
| McNamara 2015        | Direct choice          | Forced choice: place of treatment            | Randomized controlled trial | No description                                           | mean: 72 (SD: 10)                                                          | Australia        | outpatient                     | uncertain                                                                  | 53  | not reported | 100% during follow up                                                                             | Supported by a research grant from the Physiotherapy Research Foundation. The research funding body had no involvement in the study design, collection, analysis and interpretation of data; writing of the manuscript; or in the decision to submit the manuscript for publication. |
| Menn 2010            | Utility                | EQ-5D, and SF-6D                             | Cross-sectional survey      | Narrative explained by interviewer, EQ-5D, SF-12/SF-36   | Stage III Mean (SD) 67 (8)                                                 | Germany          | Hospitalized                   | Stage III 59%/41%                                                          | 34  | Not reported |                                                                                                   | not reported                                                                                                                                                                                                                                                                         |
| Miller 1999          | Utility                | HUI                                          | Cross-sectional survey      | HUI                                                      | Mean (SD): 62.8 (7.5)                                                      | Canada           | university-affiliated hospital | M/F: 17/7                                                                  | 24  | Consecutive  | unclear                                                                                           | Governmental and Private for profit: Ontario Thoracic Society, Toronto, Onatrio, Autosuture Company Canada, St Laurent, Quebec and Bio-Vascular Inc. St Paul, Minnesota                                                                                                              |
| Milne 2014           | Utility                | EQ-5D, Mapping                               | Randomized controlled trial | Narrative explained by interviewer, Health state utility | Not reported                                                               | New Zealand      | Not reported                   | Not reported                                                               | 87  | Random       |                                                                                                   | not reported                                                                                                                                                                                                                                                                         |

|                   |                      |                                         |                        |                                                                                |                         |                                              |                     |                         |      |                                                                                                                           |                      |                                                             |
|-------------------|----------------------|-----------------------------------------|------------------------|--------------------------------------------------------------------------------|-------------------------|----------------------------------------------|---------------------|-------------------------|------|---------------------------------------------------------------------------------------------------------------------------|----------------------|-------------------------------------------------------------|
| Miravitlles 2007  | Uncategorized survey | Ideal characteristics of a COPD therapy | Cross-sectional survey | Narrative explained by interviewer, Computer program or Software, Audiobooklet | %Patients age >51= 51%  | Germany, France, Italy, Spain and UK and USA | Outpatients         | 39%/61%                 | 1100 | Random                                                                                                                    |                      | not reported                                                |
| Miravitlles 2009  | Utility              | EQ-5D, VAS                              | Cross-sectional survey | EQ-5D                                                                          | Mean (SD) 69 (10)       | Spain                                        | General practice    | 715/112 86.5%/13.5%     | 827  | Other (randomly selected GPs. Participants were requested to include the first five consecutive unselected COPD patients) | 68% (248 in 360 GPs) | Not reported                                                |
| Miravitlles 2011a | Utility              | EQ-5D, VAS                              | Cross-sectional survey | Narrative explained by interviewer, EQ-5D                                      | Mean (SD) 68,5 (9,5)    | Spain                                        | Ambulatory patients | 90,7%/9,3%              | 346  | Consecutive                                                                                                               |                      | not reported                                                |
| Miravitlles 2011b | Utility              | EQ-5D, VAS                              | Cross-sectional survey | Narrative explained by interviewer, EQ-5D                                      | Mean (SD) 67,06 (10,04) | Spain                                        | Ambulatory          | 3802(83,79%)/772(16.3%) | 4574 | Random                                                                                                                    |                      | not reported                                                |
| Miravitlles 2014a | Utility              | EQ-5D, VAS                              | Cross-sectional survey | Narrative explained by interviewer, EQ-5D                                      | Mean (SD) 68,3 (9,3)    | Spain                                        | Ambulatory          | 713(83%)/133(17%)       | 846  | Not reported                                                                                                              |                      | not reported                                                |
| Miravitlles 2014b | Utility              | EQ-5D, VAS                              | Cross-sectional survey | Narrative explained by interviewer, EQ-5D                                      | Mean (SD) 67,9 (9,7)    | Spain                                        | Outpatient          | 296(85,5%)/50(14,5%)    | 346  | Consecutive                                                                                                               |                      | not reported                                                |
| Miravitlles 2015  | Utility              | EQ-5D utility                           | Cross-sectional study  | EQ-5D                                                                          | 67.9 (SD: 9.7)          | Spain                                        | outpatient          | 85.5%: males            | 346  | consecutive                                                                                                               | No data provided     | This study was funded by GlaxoSmithKline (study HZC116842). |

|                  |               |                                            |                        |                                                                                                                                      |                                                                                                                                                                                                                                                                           |                         |           |                           |       |              |                                                                                                                                                                                                                                                                                    |                                        |
|------------------|---------------|--------------------------------------------|------------------------|--------------------------------------------------------------------------------------------------------------------------------------|---------------------------------------------------------------------------------------------------------------------------------------------------------------------------------------------------------------------------------------------------------------------------|-------------------------|-----------|---------------------------|-------|--------------|------------------------------------------------------------------------------------------------------------------------------------------------------------------------------------------------------------------------------------------------------------------------------------|----------------------------------------|
| Mittmann<br>1999 | Utility       | HUI                                        | Cross-sectional survey | HUI                                                                                                                                  | age group, number and frequency:<br>12 to 19:<br>1847,<br>10.5%<br>20 to 29:<br>2982,<br>16.9%<br>30 to 39:<br>3704,<br>21.0%<br>40 to 49:<br>2891,<br>16.4%<br>50 to 59:<br>2116,<br>12.0%<br>60 to 69:<br>1904,<br>10.8%<br>70 to 79:<br>1547, 8.8%<br>80: 635,<br>3.6% | Canada                  | community | 8058/9568<br>457.7%/54.3% | 17626 | Random       | 83.00%                                                                                                                                                                                                                                                                             | Governmental/<br>Statistics Canada.    |
| Mittmann<br>2001 | Utility       | HUI                                        | Cross-sectional survey | HUI                                                                                                                                  | unclear                                                                                                                                                                                                                                                                   | Canada                  | community |                           | 274   | Random       | The longitudinal response rate for cycle 2 was 93.6%. For cross-sectional purposes, the response rate for the health component was 93.1% for the longitudinal respondents and 75.8% for the RDD portion among respondents aged 12 or older, for an overall response rate of 79.0%. | Governmental/<br>Statistics Canada.    |
| Mo 2004          | Utility       | HUI                                        | Cross-sectional survey | HUI                                                                                                                                  | unclear                                                                                                                                                                                                                                                                   | Canada                  | Community | 653/722<br>47.5%/52.5%    | 1375  | Random       | 80% (20% non-response, but not only for COPD.)                                                                                                                                                                                                                                     | Not reported                           |
| Molimard<br>2005 | Direct choice | Conjoint analysis/Discrete choice analysis | Cross-sectional survey | Computer program or Software, Sawtooth Software's adaptive choice based conjoint analysis and choice-based conjoint analysis product | Mean 60.7                                                                                                                                                                                                                                                                 | US, UK, Germany, France | Unclear   | Unclear                   | 245   | Not reported | unclear                                                                                                                                                                                                                                                                            | Private for profit/<br>Novartis Pharma |

|                 |               |                                     |                        |                                    |                                                                                 |                  |                                           |                                                     |                                                                                        |              |                                                                                                                          |                                                                                                                                                                                                                                                              |
|-----------------|---------------|-------------------------------------|------------------------|------------------------------------|---------------------------------------------------------------------------------|------------------|-------------------------------------------|-----------------------------------------------------|----------------------------------------------------------------------------------------|--------------|--------------------------------------------------------------------------------------------------------------------------|--------------------------------------------------------------------------------------------------------------------------------------------------------------------------------------------------------------------------------------------------------------|
| Moore 2004      | Direct choice | Forced choice: inhaler              | Cross-sectional survey | questionnaire                      | Mean: German 58, Dutch 61                                                       | German and Dutch | Outpatients                               | 120/136<br>46.9%/53.1%                              | 256                                                                                    | Not reported | Not reported                                                                                                             | not reported                                                                                                                                                                                                                                                 |
| Mutterlein 1990 | Direct choice | Forced choice: device               | Cross-over study       | questionnaire                      | Unclear                                                                         | Germany          | Ambulatory patients                       | Unclear                                             | 60                                                                                     | Unclear      | unclear                                                                                                                  | Unclear                                                                                                                                                                                                                                                      |
| Naberan 2012    | Utility       | EQ-5D, VAS                          | Cross-sectional survey | EQ-5D, EQ-5D VAS                   | Mean (SD) 67.1 (10)                                                             | Spain            | not reported                              | 3792/740;<br>83.3%/16.7%                            | 4552                                                                                   | Consecutive  | 4891 were recruited, 317 (6.5%) were excluded because they met one or more exclusion criteria                            | not reported                                                                                                                                                                                                                                                 |
| Nakken 2017     | Utility       | VAS, EQ-5D utility, AqoL-8D utility | Cross-sectional study  | EQ-5D                              | 63.3 (8.0) for female patients and 68.7 (8.3) for male patients                 | The Netherlands  | outpatient                                | 45.2%/54.8%                                         | 188 patient-partner couples                                                            | consecutive  |                                                                                                                          | This project is financially supported by Lung Foundation Netherlands, Leusden, the Netherlands, Grant 3.4.12.024 and by a research grant from Boehringer-Ingelheim, the Netherlands. The authors report no conflicts of interest in this work.               |
| Nilsson 2007    | Utility       | VAS                                 | Repeated surveys       | EQ-5D, SF-12/SF-36                 | Age >65 56%, no mean was reported                                               | Sweden           | outpatients                               | women 54%/ men 46%                                  | 70 before /60 after measurements in project; 61 before/ 51 after measurements in study | Not reported | 70 patients included in the study with COPD, 60 patient that fulfilled questionnaires before and after the interventions | not reported                                                                                                                                                                                                                                                 |
| Nishimura 2008  | Utility       | QWB                                 | Cross-sectional survey | Narrative explained by interviewer | Mean age 70±6 years                                                             | Japan            | not reported                              | 100% male                                           | 161                                                                                    | Not reported | not reported                                                                                                             | not reported                                                                                                                                                                                                                                                 |
| Nolan 2016      | Utility       | VAS, EQ-5D utility                  | Cohort study           | EQ-5D                              | Mean SD: 70.4 (9.3) for study 1; Mean (95% CI): 70.2 (69.2 to 71.2) for study 2 | UK               | respiratory clinics at Harefield Hospital | 59.7%/40.3% for study 1 and 59.3%/40.7% for study 2 | 616 for study 1 and 324 for study 2                                                    | consecutive  | 98.6% for study 1 and 81% for study 2                                                                                    | This work was funded through a National Institute for Health Research (NIHR) Clinical Scientist award (CS/7/007), NIHR Clinical Trials Fellowship (NIHR-CTF-01-12-04) and Medical Research Council (MRC) New Investigator Grant (G1002113) awarded to WD-CM. |
| Norris 2005     | Direct choice | Forced choice: treatment            | Cross-sectional survey | questionnaire                      | Mean (SD) 67.2 (9.5)                                                            | US               | outpatient                                | 81/30<br>73.0%/27.0%                                | 111                                                                                    | Consecutive  | 40% (118/295)                                                                                                            | Private not for profit and Governmental/ Clinical Research Trainee Award in Critical Care from the CHEST Foundation/K24 Award from the National Heart Lung and Blood Institute (K24 HL68593)                                                                 |

|                              |                      |                                              |                                         |                                           |                                                           |             |                                                              |                                                                                                            |                                              |                                                                             |                                                                                                                                          |                                                                                                                   |
|------------------------------|----------------------|----------------------------------------------|-----------------------------------------|-------------------------------------------|-----------------------------------------------------------|-------------|--------------------------------------------------------------|------------------------------------------------------------------------------------------------------------|----------------------------------------------|-----------------------------------------------------------------------------|------------------------------------------------------------------------------------------------------------------------------------------|-------------------------------------------------------------------------------------------------------------------|
| Nyman 2007                   | Utility              | Time trade off                               | Cross-sectional survey                  | not reported                              | not reported                                              | USA         | study on population of USA                                   | not reported                                                                                               | 39751 (597 diagnosed with emphysema)         | Not reported                                                                | not reported                                                                                                                             | University grant                                                                                                  |
| O'Reilly 2007                | Utility              | EQ-5D, VAS                                   | Repeated surveys                        | Narrative explained by interviewer, EQ-5D | 69,89 (SD=8,59)                                           | UK          | hospitalized patients                                        | Female 81 (54%), male (46%)                                                                                | 149                                          | Consecutive                                                                 | follow up sample n=39                                                                                                                    | not reported                                                                                                      |
| Ohno 2014                    | Direct choice        | Forced choice: treatment                     | Trial, non-randomized or non-controlled | Narrative explained by interviewer        | 75,7±7,0                                                  | Japan       | outpatients                                                  | male/female = 26/2                                                                                         | 28                                           | Not reported                                                                | 29 included/ 28 completed follow up                                                                                                      | not reported                                                                                                      |
| Ojoo 2002                    | Direct choice        | Forced choice: treatment                     | Randomized controlled trial             | no description                            | Mean 70.1 in conventional arm and 69.7 in domiciliary arm | UK          | inpatient at the beginning, either hospital or at home after | 31/29 51.6%/48.4% in total; 15/15 50%/50% in conventional arm and 16/15 53.3%/47.7% in the domiciliary arm | 61                                           | Other (Recruitment into the study was carried out from Monday to Thursday.) | Not reported response rate. 88.5% (54/61, six patients failed to complete the trial, one patient did not provide preference information) | Governmental and unclear/ Part of the funding of this study was obtained from East Yorkshire Hospitals NHS Trust. |
| Oliver 1997                  | Direct choice        | Ranking: treatment                           | Cross-over study                        | unclear                                   | unclear                                                   | UK          | unclear                                                      | Unclear                                                                                                    | 20                                           | unclear                                                                     | Unclear                                                                                                                                  | unclear                                                                                                           |
| Olszanecka-Glinianowicz 2014 | Uncategorized survey | Brief Illness Perception Questionnaire       | Cross-sectional survey                  | No description                            | Mean (SD) 60.0 (13.5)                                     | Poland      | general practice                                             | 1491/1111 57.3%/42.7%                                                                                      | 2602                                         | Consecutive                                                                 | Not reported                                                                                                                             | Not reported                                                                                                      |
| Osman 2008                   | Utility              | VAS                                          | Cross-sectional survey                  | EQ-5D                                     | 69 (SD - 8,2)                                             | UK          | patients living in home                                      | Male 67 (45%), female (55%)                                                                                | 206                                          | Not reported                                                                | 534 invited, 148 after initial survey                                                                                                    | Funded by Egga Partnership Charitable Trust                                                                       |
| Pallin 2012                  | Direct choice        | Willingness to pay, Forced choice: treatment | Cross-sectional survey                  | Narrative explained by interviewer        | 64,4 ±6,7                                                 | Ireland     | outpatient, or hospitalized on the day of discharge          | male 26 (46,4%), female (53,6%)                                                                            | 146 patient approached/ 142 completed survey | Consecutive                                                                 | no follow up                                                                                                                             | not reported                                                                                                      |
| Park 2015                    | Utility              | VAS, EQ-5D utility                           | Cross-sectional study                   | EQ-5D                                     | 64.7 (0.4)                                                | South Korea | general population (COPD subsample)                          | Male: 72.5% (SD: 1.8%)                                                                                     | 1302                                         | stratified multistage probability sampling                                  | not applicable                                                                                                                           | The authors have no support or funding to report.                                                                 |



|               |                      |                                            |                        |                                           |                                                                                 |                                      |                                       |                                    |                            |              |                                                                                                                                                                                                                                                         |                                                                                                                                                                                                          |
|---------------|----------------------|--------------------------------------------|------------------------|-------------------------------------------|---------------------------------------------------------------------------------|--------------------------------------|---------------------------------------|------------------------------------|----------------------------|--------------|---------------------------------------------------------------------------------------------------------------------------------------------------------------------------------------------------------------------------------------------------------|----------------------------------------------------------------------------------------------------------------------------------------------------------------------------------------------------------|
| Pascual 2015  | Direct choice        | Forced choice: inhaler                     | Cross-over study       | no description                            | 67.6 (8.0)                                                                      | Germany, Spain, the UK               | outpatient                            | males: 91, 71.7%/28.3%             | 127                        | not reported | not reported                                                                                                                                                                                                                                            | The study was funded by Almirall S.A., Barcelona, Spain, and Forest Laboratories LLC, a subsidiary of Actavis PLC, New York, USA. Medical writing support was funded by Almirall S.A., Barcelona, Spain. |
| Paterson 2000 | Utility              | EQ-5D, VAS                                 | Repeated surveys       | Narrative explained by interviewer, EQ-5D | 61                                                                              | Scotland, UK                         | outpatients                           | male/female - 37(46%)/43 (53%)     | 81                         | Consecutive  | 80; 1 missing                                                                                                                                                                                                                                           | Funding by Glaxo Wellcome Research and Development                                                                                                                                                       |
| Patridge 2011 | Uncategorized survey | perception of disease severity             | Cross-sectional survey | No description                            | Mean (SD) 62.4 (8.6)                                                            | UK, Germany, France, Italy and Spain | Unclear                               | 406/313 56.5%/43.5%                | 719                        | Random       | Exact data on response rates following random selection (from among the asthma and COPD patients listed in each country as part of the pre-recruited panel of 1,835,000 individuals) and invitation to participate are unavailable... Approximately 50% | Private not for profit/ Chiesi Foundation                                                                                                                                                                |
| Persson 2005  | Uncategorized survey | Importance of life values                  | Cohort study           | Narrative explained by interviewer        | 64,7 (min-max - 54-71)                                                          | Sweden                               | hospitalized and outpatients          | Male 43 (63%)/ Female 22 (37%)     | 65                         | Consecutive  | 46 (29% drop out rate)                                                                                                                                                                                                                                  | Financially supported by the Medical Faculty, University of Goteborg                                                                                                                                     |
| Peters 2014a  | Utility              | EQ-5D, VAS                                 | Repeated surveys       | EQ-5D                                     | not reported                                                                    | UK                                   | outpatients                           | not reported                       | 279 (response rate 49,2%). | Not reported | 187 (response rate 71,4%)                                                                                                                                                                                                                               | Funded by the Department of Health (England)                                                                                                                                                             |
| Pickard 2011  | Utility              | EQ-5D, VAS                                 | Cross-sectional survey | Narrative explained by interviewer, EQ-5D | 71,2 (SD - 10,3)                                                                | UK                                   | outpatients and hospitalized patients | Male - 118 (98,3)/ Female 2 (1,7%) | 120                        | Not reported | no follow-up                                                                                                                                                                                                                                            | not reported                                                                                                                                                                                             |
| Pisa 2013     | Direct choice        | Conjoint analysis/Discrete choice analysis | Cross-sectional survey | Narrative explained by interviewer        | years: 1. 40-50 - 32%; 2. 51-60 - 43%; 3. 61-70 - 25%; Agerage age - 55,3 years | Germany                              | not reported                          | Male/ female: 63%/37%              | 300                        | Not reported | no follow-up                                                                                                                                                                                                                                            | funded by Novartis Pharma GmbH                                                                                                                                                                           |
| Polati 2012   | Uncategorized survey | Expectation of treatment                   | Cross-sectional survey | Narrative explained by interviewer        | 63,3 (SD - 9,3)                                                                 | Turkey                               | outpatients                           | male/ female - 89,9%/10,1%         | 497                        | Not reported | no follow-up                                                                                                                                                                                                                                            | Funded by AstraZeneca Turkey                                                                                                                                                                             |

|                    |                      |                           |                        |                                                                                                         |                       |                                        |                  |                                                    |                                                  |                            |                   |                                                          |
|--------------------|----------------------|---------------------------|------------------------|---------------------------------------------------------------------------------------------------------|-----------------------|----------------------------------------|------------------|----------------------------------------------------|--------------------------------------------------|----------------------------|-------------------|----------------------------------------------------------|
| Price 2013a        | Utility              | EQ-5D                     | Cross-sectional        | EQ-5D                                                                                                   | 65.7 (10.5)           | France, Germany, Italy, Spain, UK      | outpatients      | Male/female - 69,9%/30,1%                          | 2807                                             | consecutive                | not reported      | not reported                                             |
| Price 2013b        | Direct choice        | Forced choice: treatment  | Cohort study           | no description                                                                                          | Mean (SD) 70.4 (9.8)  | UK (England or Scotland)               | general practice | 1058/980 54.2%/45.8%                               | 2138                                             | Other: based on a database | 28.3% (2138/7559) | Private for profit                                       |
| Puente-Maestu 2016 | Utility              | EQ-5D utility             | Cross-sectional study  | EQ-5D                                                                                                   | 68.0 (9.0)            | Spain                                  | not reported     | Males: 79.7% (SE: 2.3%); Females: 20.3% (SE: 2.3%) | 296                                              | consecutive                | not reported      | This study was financed in full by Ferrer International. |
| Puhan 2004         | Utility              | VAS                       | Cross-sectional survey | Narrative explained by interviewer                                                                      | 69,0 (7,2)            | Switzerland, Germany, Austria          |                  | Male/ Female - 43 (65,5%)/18 (34,5%)               | 80                                               | Consecutive                | 6100.00%          | not reported                                             |
| Puhan 2007         | Utility              | Standard gamble, VAS, HUI | Cross-sectional survey | Narrative explained by interviewer, EQ-5D                                                               | 69,0 (8,7)            | Canada, USA                            | hospitalized     | males/ females - 59%/41%                           | 281                                              | Not reported               | 17700.00%         | not reported                                             |
| Punekar 2007       | Utility              | EQ-5D                     | Cross-sectional survey | Narrative explained by interviewer, EQ-5D                                                               | 66 (SE 0,29)          | USA, France, Germany, Italy, Spain, UK | outpatients      | Male/ female - 66/ 34%                             | 1381                                             | Random                     |                   | not reported                                             |
| Reinke 2011        | Direct choice        | Forced choice: treatment  | Cross-sectional survey | Narrative explained by interviewer, In-person contact with someone who has experienced the health event | 69,4 (sd=10,0)        | USA                                    | outpatient       | male/female - 96,8%(333)/3,2%                      | 1292 invited but 376 meet the inclusion criteria | Consecutive                |                   | not reported                                             |
| Reinke 2013        | Uncategorized survey | Forced choice: treatment  | Cross-sectional survey | No description                                                                                          | Mean (SD) 69.4 (10.0) | USA                                    | Not reported     | 97%/3%                                             | 376                                              | Other: Trial based sample  | Not reported      | not reported                                             |

|                              |                               |                                                                          |                             |                                           |                        |              |                                      |                                   |                                                                |                                            |                                |                                                                                                                                                                       |
|------------------------------|-------------------------------|--------------------------------------------------------------------------|-----------------------------|-------------------------------------------|------------------------|--------------|--------------------------------------|-----------------------------------|----------------------------------------------------------------|--------------------------------------------|--------------------------------|-----------------------------------------------------------------------------------------------------------------------------------------------------------------------|
| Rhee 2017                    | Utility                       | EQ-5D utility                                                            | Cross-sectional study       | EQ-5D                                     | 63.5 (11.9)            | South Korea  | general population (COPD subsample)  | Male: 1692 (70.6%)                | 2397                                                           | stratified multistage probability sampling | not applicable                 | This study was supported by a grant (2014P3300300) from the Korea Centers for Disease Control and Prevention. This study was supported by COPD cohort data of HIRA    |
| Riley 2016                   | Direct choice                 | Forced choice: inhaler                                                   | Randomized controlled trial | No description                            | Not reported           | Not reported | not reported                         | not reported                      | 618                                                            | not reported                               | not reported                   | Development of the CDPO, these clinical studies, and analyses were funded by GlaxoSmithKline. All medical writing and editorial support was funded by GlaxoSmithKline |
| Ringbaek 2008                | Utility                       | EQ-5D, VAS                                                               | Repeated surveys            | Narrative explained by interviewer, EQ-5D | 69,1 (8,1)             | Denmark      | not reported                         | male/female – 31,9%/68,1%         | 229                                                            | Not reported                               |                                | not reported                                                                                                                                                          |
| Rinnenburger 2012            | Direct choice                 | Preferences of decision making mode                                      | Repeated surveys            | Narrative explained by interviewer        | not reported           | Italy        | hospitalized                         | not reported                      | 84 (what was the 84% of whole population with other illnesses) |                                            | not reported                   | not reported                                                                                                                                                          |
| Rocker 2008                  | Uncategorized survey          | Questionnaire with 28 elements that addressed importance of five domains | Cross-sectional survey      | HUI, questionnaire                        | Mean (SD) 73.27 (7.84) | Canada       | tertiary referral teaching hospitals | 62/54/2 missing, 52.5%/45.8%/1.7% | 118                                                            | Not reported                               | Not reported                   | Governmental/the National Health Research and Development Program of Canada.                                                                                          |
| Rocker 2013                  | Uncategorized survey          | Reasons to continue (or not) with opioids                                | Cohort study                | no description                            | 74 (51-89 YEARS)       | Canada       | not reported                         | Male/female – 19 (42%)/26 (58%)   | 55 enrolled/32 finished the study                              | Not reported                               | 45 patients, 31 finished study | This study was funded by the Canadian Institutes of Health Research                                                                                                   |
| Rodriguez Gonzalez-Moro 2009 | Utility, Uncategorized survey | VAS, importance of family habits changes because of COPD                 | Cross-sectional survey      | Narrative explained by interviewer, EQ-5D | 67,8 (67,3-68,3)       | Spain        | outpatient                           | Male/female – 88%/12%             | 1596                                                           | Not reported                               |                                | not reported                                                                                                                                                          |

|                        |         |                      |                             |                                                  |                                                                        |                                                                                                                           |                                                       |                                                                |                                                                                               |                  |                                                                                                                                                                                                                                                                                                                                                                                                           |                                                                                                                                                                 |
|------------------------|---------|----------------------|-----------------------------|--------------------------------------------------|------------------------------------------------------------------------|---------------------------------------------------------------------------------------------------------------------------|-------------------------------------------------------|----------------------------------------------------------------|-----------------------------------------------------------------------------------------------|------------------|-----------------------------------------------------------------------------------------------------------------------------------------------------------------------------------------------------------------------------------------------------------------------------------------------------------------------------------------------------------------------------------------------------------|-----------------------------------------------------------------------------------------------------------------------------------------------------------------|
| Rutten van Molken 2006 | Utility | EQ-5D, VAS           | Cross-sectional survey      | EQ-5D                                            | 64,5 (8,4)                                                             | USA, Czech Republic, Spain, Denmark, Germany, Poland, the Netherlands, Italy, France, Hungary, Russia, Belgium, Australia | Male/female – 902 (73%)/333 (27%)                     |                                                                | 1235                                                                                          | Consecutive      |                                                                                                                                                                                                                                                                                                                                                                                                           | not reported                                                                                                                                                    |
| Rutten van Molken 2009 | Utility | VAS, Time trade off  | Cross-over study            | Narrative explained by interviewer               | 45 (16)                                                                | The Netherlands                                                                                                           | Male/Female – 48%/52%                                 |                                                                | 239                                                                                           | Not reported     |                                                                                                                                                                                                                                                                                                                                                                                                           | Financial support for this study was provided by Boehringer Ingelheim International and Pfizer Global Pharmaceuticals                                           |
| Sassi-Dambron 1995     | Utility | QWB                  | Randomized controlled trial | Other:Health-Related Quality of Well-Being Scale | (mean (SD))<br>1. Treatment: 67.5 (8.0)<br>2. Control: 67.3 (8.0)      | United States                                                                                                             | Community; primary (community physicians and clinics) | Total: 49M/40F<br>1. Treatment: 26M/20F<br>2. Control: 23M/20F | Initial: 98 subjects (47 treatment, 51 control). After dropout: 89 (46 treatment; 43 control) | Voluntary sample | NR for response rate. Drop-out: 98 subjects randomized; 9 drop-outs; final = 89 subjects (90.82%). Of the 98 subjects randomly assigned to treatment (n= 47)and control(n= 51)groups,ninedropped out before treatment, one from the treatment and eight from the control group.Reasons for dropping included illness(treatment= 1,control= 1),time conflict(control= 4),and lack of interest (control=3). | grant 2RT0268 from the University of California Tobacco Related Disease Research Program and grant R01 HL34732 from the National Heart, Lung & Blood Institute. |
| Scharf 2011            | Utility | HUI                  | Cross-sectional survey      | Narrative explained by interviewer               | 65,9 (11,7)                                                            | Israel                                                                                                                    | hospitalized                                          | male/female - 140 (77,8%)/40 (22,2%)                           | 180                                                                                           | Not reported     |                                                                                                                                                                                                                                                                                                                                                                                                           | The study was funded by a grant from the Dean's office, Faculty of Health Sciences, Ben-Gurion University of the Negev, Beersheba, Israel                       |
| Schunemann 2003        | Utility | Standard gamble, VAS | Randomized controlled trial | HUI, other: marker states                        | 66 (7) With marker states 66.8 (7.6); without marker states 64.7 (7.5) | Canada                                                                                                                    | rehabilitation or conventional community care         | 46/38 54.8%/45.2%                                              | 84                                                                                            | Consecutive      | 84/130=64.6%                                                                                                                                                                                                                                                                                                                                                                                              | Governmental/ Medical Research Council of Canada                                                                                                                |

|                   |                      |                                               |                             |                                    |                                                                                                      |                |                                                                                                                     |                                                                                                  |     |              |                              |                                                                                                                                                                                                                                                                                   |
|-------------------|----------------------|-----------------------------------------------|-----------------------------|------------------------------------|------------------------------------------------------------------------------------------------------|----------------|---------------------------------------------------------------------------------------------------------------------|--------------------------------------------------------------------------------------------------|-----|--------------|------------------------------|-----------------------------------------------------------------------------------------------------------------------------------------------------------------------------------------------------------------------------------------------------------------------------------|
| Schunemann 2007   | Utility              | Standard gamble, VAS                          | Cross-sectional survey      | HUI, other: clinical marker states | 68.2 (8.1)                                                                                           | Canada, the US | respiratory rehabilitation programs at four centers in Canada and the United States                                 | 54/37 (59.3%/40.7%)                                                                              | 91  | Consecutive  | Unclear                      | Private for profit/<br>an unrestricted grant from AstraZeneca, Inc.                                                                                                                                                                                                               |
| Seymour 2010      | Utility              | VAS                                           | Randomized controlled trial | EQ-5D                              | UC group 65 (10); PEPR 67 (10)                                                                       | UK             | Hospitalization patients and 3-month follow up                                                                      | UC group: 14/16 46.7%/53.3%; PEPR group: 13/17 43.3%/56.7%                                       | 60  | Not reported | unclear; 60 of 61 randomized | Governmental/ JMS was funded by a British Lung Foundation Project Grant (P04/8). CJJ was funded by the Medical Research Council UK. JSS was funded by the European Respiratory Society. WDCM was funded by the Medical Research Council UK and the National Institute for Health. |
| Sharafkhaneh 2013 | Uncategorized survey | Primary disadvantages of nebulization therapy | Cross-sectional survey      | no description                     | Age group: n(%)<br>18–24: 4 (1)<br>25–34: 5 (1)<br>35–44: 23 (6)<br>45–64: 168 (42)<br>≥65: 200 (50) | USA            | COPD households compiled from a variety of sources (i.e., direct outreach, magazine, and publication subscriptions) | 140/260 (35%/65%)                                                                                | 400 | Random       | 10.4% (800 of 7691)          | Private for profit/<br>Mylan Specialty L.P.                                                                                                                                                                                                                                       |
| Siler 2014        | Direct choice        | Patient's expectation of treatment adherence  | Randomized controlled trial | no description                     | Overall: 61.5 (8.68)<br>Indacaterol/placebo: 62.2 (10.29)<br>Placebo/indacaterol: 60.8 (6.90)        | USA            | unclear                                                                                                             | Overall: 27/13 68%/32%<br>Indacaterol/placebo: 11/9 55%/45%<br>Placebo/indacaterol: 16/4 80%/20% | 40  | Not reported | unclear                      | Private for profit                                                                                                                                                                                                                                                                |

|            |                      |                                                                                                                           |                        |                |                                                                                                  |         |                                                                                                                                                                                                                                    |                                                                                                    |     |                    |              |                                                                                                                                                                                       |
|------------|----------------------|---------------------------------------------------------------------------------------------------------------------------|------------------------|----------------|--------------------------------------------------------------------------------------------------|---------|------------------------------------------------------------------------------------------------------------------------------------------------------------------------------------------------------------------------------------|----------------------------------------------------------------------------------------------------|-----|--------------------|--------------|---------------------------------------------------------------------------------------------------------------------------------------------------------------------------------------|
| Simon 2013 | Uncategorized survey | A 5-point scale, on behaviour and own efforts that the patient is willing to mobilize in order to achieve greater health) | Cross-sectional survey | no description | Age group: number (%)<br>-40 years: 4 (2.7%)<br>41-60 years: 71 (48.3%)<br>61- years: 72 (49.0%) | Hungary | six out of the seven pulmonary centers of Hungary                                                                                                                                                                                  | 74/73<br>50.3%/49.7%                                                                               | 147 | convenience sample | unclear      | Unclear/ The author declares that the research was conducted in the absence of any commercial or financial relationships that could be construed as a potential conflict of interest. |
| Small 2015 | Utility              | EQ-5D utility                                                                                                             | Cross-sectional study  | EQ-5D          | <65 years: 307 (38.1%)<br>65 year and older: 498 (61.9%)                                         | USA     | routine care                                                                                                                                                                                                                       | Male: 443 (55.0%)<br>Female: 360 (44.7%)<br>Missing: 2 (0.3%)                                      | 805 | consecutive        | not reported | Novartis Pharmaceuticals Corporation provided funding for the analysis of these data and medical writing support                                                                      |
| Solem 2013 | Utility              | EQ-5D                                                                                                                     | Cross-sectional survey | EQ-5D          | 68.0 (9.6), severe COPD: 67.4 (9.8), very severe COPD: 68.8 (9.2)                                | US      | Practice of pulmonologist and primary care physicians: A stratified random quota sample of 100 physicians (with a target of equal representation by pulmonologists and primary care physicians drawn in equal proportions from the | 161/153 (51.3%/48.7%)<br>severe COPD: 94/96 (49.5%/50.5%)<br>very severe COPD: 67/57 (54.0%/46.0%) | 314 | Random             | unclear      | Private not for profit/ Forest Research Institute                                                                                                                                     |

|               |                      |                                                                                            |                             |                |                                                     |           |                                                                   |                                                                       |     |              |                                                     |                                                                                                                                                                                     |
|---------------|----------------------|--------------------------------------------------------------------------------------------|-----------------------------|----------------|-----------------------------------------------------|-----------|-------------------------------------------------------------------|-----------------------------------------------------------------------|-----|--------------|-----------------------------------------------------|-------------------------------------------------------------------------------------------------------------------------------------------------------------------------------------|
| Sorensen 2016 | Utility              | EQ-5D utility                                                                              | Randomized controlled trial | EQ-5D          | Usual care: 69.7 (8.6), case management: 69.0 (8.4) | Denmark   | community based case management                                   | Usual care: 27/47 (36.5%/63.5%); case management: 36/38 (48.7%/51.3%) | 150 | not reported | 62.8% (150 of 239 enrolled), 148 of 150 followed up | The research project received support from The North Denmark Region, Denmark. The sponsors of the study had no role in data analysis, data interpretation, or writing of the paper. |
| Spencer 2013  | Uncategorized survey | importance of exercise and support, and the importance of seeing the same person each time | Randomized controlled trial | no description | IG: 65 (8); CG: 66 (8)                              | Australia | Outpatients                                                       | IG: 9/10; CG: 10/7                                                    | 48  | Not reported | 36/48                                               | Not reported                                                                                                                                                                        |
| Stahl 2005    | Utility              | EQ-5D, VAS                                                                                 | Cross-sectional survey      | EQ-5D          | Mean (range): 64.3 (28-80)                          | Sweden    | subjects with COPD from the general population in Northern Sweden | 98/70 58.3%/41.7%                                                     | 168 | Not reported | unclear                                             | Private for profit (Astra Zeneca)                                                                                                                                                   |

|                |               |                                      |                        |                                    |                                                |                             |                                                                                                                                                                    |                     |      |              |                                                                                                           |              |
|----------------|---------------|--------------------------------------|------------------------|------------------------------------|------------------------------------------------|-----------------------------|--------------------------------------------------------------------------------------------------------------------------------------------------------------------|---------------------|------|--------------|-----------------------------------------------------------------------------------------------------------|--------------|
| Stapleton 2005 | Direct choice | Forced choice: treatment             | Cross-sectional survey | Booklet/card                       | Median (interquartile range): 67.4 (59.4–74.3) | USA                         | End of life care/ ambulatory pulmonary clinics in three hospitals (university, county, and Veterans Affairs Medical Center) and through an oxygen delivery company | 78/23               | 101  | Consecutive  | 34.2% (101/295)                                                                                           | not reported |
| Starkie 2011   | Utility       | EQ-5D, mapping                       | Cross-sectional survey | EQ-5D                              | Mean (SD) 64.7 (8.4)                           | 444 centers in 42 countries | Unclear                                                                                                                                                            | 2586/1054 (71%/29%) | 3640 | Not reported | Unclear for the response rate, and for the response rate of the EQ-5D from TORCH trial: 59.6% (3640/6112) | not reported |
| Stavem 1999    | Utility       | Standard gamble, Time trade off, 15D | Cross-sectional survey | Narrative explained by interviewer | Mean (SD) 57 (9.1)                             | Norway                      | outpatients                                                                                                                                                        | 34/25               | 59   | Consecutive  | 76.6% (59 in 77)                                                                                          | not reported |
| Stavem 2002a   | Utility       | Time trade off                       | Cross-sectional survey | Decision board                     | Mean (SD) 57 (10)                              | Norway                      | outpatients, identified the Central Hospital of Akershus, Norway                                                                                                   | 34/25 57.6%/42.4%   | 59   | Consecutive  | 29.8% (59/198)                                                                                            | Not reported |



|               |                        |                                                                |                                         |                                                                                                                                                                      |                                                        |               |                                                                  |                                                                   |                     |             |                                                                                                                                                                                                                                                                                                                                                                                                                                                              |                                                                                                                                          |
|---------------|------------------------|----------------------------------------------------------------|-----------------------------------------|----------------------------------------------------------------------------------------------------------------------------------------------------------------------|--------------------------------------------------------|---------------|------------------------------------------------------------------|-------------------------------------------------------------------|---------------------|-------------|--------------------------------------------------------------------------------------------------------------------------------------------------------------------------------------------------------------------------------------------------------------------------------------------------------------------------------------------------------------------------------------------------------------------------------------------------------------|------------------------------------------------------------------------------------------------------------------------------------------|
| Stavem 2002b  | Utility, Direct choice | Time trade off, Standard gamble, VAS, 15 D, willingness to pay | Cross-sectional survey                  | EQ-5D, a script and a payment card with a range of 13 amounts                                                                                                        | Mean (SD) 57 (10)                                      | Norway        | outpatients, identified the Central Hospital of Akershus, Norway | 34/25 57.6%/42.4%                                                 | 59                  | Consecutive | 29.8% (59/198)                                                                                                                                                                                                                                                                                                                                                                                                                                               | Not reported                                                                                                                             |
| Stein 2009    | Utility                | Standard gamble                                                | Cross-sectional survey                  | Booklet/card (The COPD vignettes were based on the Chronic Respiratory Disease Questionnaire (CRDQ), as used in a trial of community-based pulmonary rehabilitation) | Mean (SD) 48.2(13.3)                                   | UK            | General population                                               | 54/58 48.2%/51.2%                                                 | 112                 | Random      | 2.1% (Overall, 5,320 people were contacted through the electoral roll. Only 1215 (23%) of those approached responded to the initial invitation letter. Of this group, 286 (23.6%) expressed willingness to participate in the project and 112 (39% of those who agreed) attended a training session. Only people who attended a training session were considered part of the panel. Thus, the net final recruitment was 2.1% of those initially approached.) | Governmental/ NHS R&D Programme; National Institute for Health and Clinical Excellence (NICE); NHS Quality Improvement Scotland (NHSQIS) |
| Steuten 2006  | Utility                | VAS                                                            | Trial, non-randomized or non-controlled | EQ-5D                                                                                                                                                                | mean (SD) 61 (14)                                      | Netherlands   | university hospital and 16 general practices                     | 56/44%                                                            | 317 (1062 in total) | Consecutive | Unclear 685/1062 (317 are COPD)                                                                                                                                                                                                                                                                                                                                                                                                                              | Not reported                                                                                                                             |
| Stoddart 2015 | Utility                | EQ-5D utility                                                  | Randomized controlled trial             | EQ-5D                                                                                                                                                                | telemonitoring sample: 69.4 (8.8) controls: 68.4 (8.4) | UK (Scotland) | primary care                                                     | telemonitoring sample: 53/75 (41%/59%), controls: 63/65 (49%/51%) | 256                 | consecutive | not reported                                                                                                                                                                                                                                                                                                                                                                                                                                                 | The work was funded by a grant from the Chief Scientist's Office of the Scottish Government (ARPG/07/03).                                |
| Sundh 2015    | Utility                | VAS, EQ-5D utility                                             | Cross-sectional study                   | EQ-5D                                                                                                                                                                | male: 72.2 (8.11), female: 70.5 (7.58)                 | Sweden        | Secondary care respiratory units                                 | 165/208 (44.2%/55.8%)                                             | 373                 | consecutive | not reported                                                                                                                                                                                                                                                                                                                                                                                                                                                 | he study was supported by an unrestricted grant from Takeda Pharma AB, Sweden.                                                           |

|                     |                        |                         |                             |                                    |                                                               |             |                                                              |                                                                                |            |                                             |                                                                                 |                                                                                                                                                                                                                                                                                                                                                              |
|---------------------|------------------------|-------------------------|-----------------------------|------------------------------------|---------------------------------------------------------------|-------------|--------------------------------------------------------------|--------------------------------------------------------------------------------|------------|---------------------------------------------|---------------------------------------------------------------------------------|--------------------------------------------------------------------------------------------------------------------------------------------------------------------------------------------------------------------------------------------------------------------------------------------------------------------------------------------------------------|
| Sutherland 2009     | Direct choice          | Forced choice: device   | Randomized controlled trial | Narrative explained by interviewer | Mean (SD) 62 (10)                                             | USA         | outpatients                                                  | 49/50<br>50%/50%                                                               | 99/ 109    | Not reported                                | 93/109                                                                          | Private for profit/<br>Dey LP                                                                                                                                                                                                                                                                                                                                |
| Svedsater 2013      | Direct choice          | Forced choice: inhaler  | Cross-sectional survey      | Narrative explained by interviewer | Mean: 61                                                      | USA         | Unclear                                                      | Unclear                                                                        | 42         | Other: Trial based                          | unclear                                                                         | Private for profit/<br>GlaxoSmithKline                                                                                                                                                                                                                                                                                                                       |
| Szende 2009         | Utility                | EQ-5D, SF-6D            | Cross-sectional survey      | EQ-5D, SF-12/SF-36                 | Mean (SD) 64 (12.3)                                           | Sweden      | Unclear                                                      | 74/102<br>(42%/58%)                                                            | 176        | Other: based on two cross-sectional surveys | unclear                                                                         | Not reported                                                                                                                                                                                                                                                                                                                                                 |
| Tabak 2014          | Utility                | EQ-5D, VAS              | Randomized controlled trial | EQ-5D                              | Mean (SD) Telehealth group 64.1 (9.0); Usual care 62.8 (7.4)  | Netherlands | Outpatients                                                  | All: 12/12, 50%/50%<br>Telehealth: 6/6<br>50%/50%,<br>Usual care: 6/6, 50%/50% | 24         | Not reported                                | not reported for response rate, while 24/29 finished the follow up              | Governmental/ NL Agency, a division of the Dutch Ministry of Economic Affairs (grant CALLOP9089)                                                                                                                                                                                                                                                             |
| Taylor 2012         | Utility                | EQ-5D                   | Randomized controlled trial | EQ-5D                              | Mean (SD) Intervention: 69.0 (9.8); control: 70.5 (10.0)      | UK          | 10 primary care teams or from a community respiratory clinic | Intervention: 40/38, 51.3%/48.7%; Control: 13/25, 34.2%/65.8%                  | 116        | Consecutive                                 | 116/507                                                                         | the National Institute for Health Research (NIHR)                                                                                                                                                                                                                                                                                                            |
| Torrance 1999       | Utility, Direct choice | HUI, willingness to pay | Randomized controlled trial | HUI                                | Mean (SE) ciprofloxacin: 54.9 (1.46); Usual care: 55.8 (1.36) | Canada      | outpatients                                                  | ciprofloxacin: 44/71 38%/62%; Usual care: 53/54 50%/50%                        | 222 in 240 | Not reported                                | not reported                                                                    | Private for profit/<br>Bayer Inc.                                                                                                                                                                                                                                                                                                                            |
| Torres-Sánchez 2016 | Utility                | VAS                     | Randomized controlled trial | EQ-5D                              | Intervention group: 72.36 (8.91)<br>Control group: 73.7 (7.1) | Spain       | Inpatient                                                    | Men: 47;<br>women: 2                                                           | 49         | consecutive                                 | unclear response rate, 100% follow up (i.e. no patients were lost to follow-up) | This work was supported by the Professional association of physiotherapists of AndalusiaSpain (Colegio Profesional de Fisioterapeutas de Andalucía. [number SG0300/13CQ]and the Spanish society of Pneumology and thoracic surgery (SEPAR)and Spanish Foundation of the lung(Fundación Respira). (Beca Becario SEPAR 2013) [Grant numberProyecto: 061/2013]. |

|                |               |                                   |                             |                                    |                                                                                    |             |                                                                                                                    |                                                                                |                                           |             |                                                               |                                                                                          |
|----------------|---------------|-----------------------------------|-----------------------------|------------------------------------|------------------------------------------------------------------------------------|-------------|--------------------------------------------------------------------------------------------------------------------|--------------------------------------------------------------------------------|-------------------------------------------|-------------|---------------------------------------------------------------|------------------------------------------------------------------------------------------|
| Travaline 1995 | Direct choice | Forced choice: treatment          | Cross-sectional survey      | Narrative explained by interviewer | median (range): 67 (43-81)                                                         | USA         | University Health Center of the University of Maryland Hospital and the Baltimore Veterans Administration Hospital | 29/8<br>78.4%/21.6%                                                            | 37                                        | Consecutive | not reported, while 37 of the 40 finished the survey          | Not reported                                                                             |
| Turner 2014    | Utility       | EQ-5D, VAS                        | Repeated surveys            | EQ-5D                              | Mean (SD) 68.3 (9.3)                                                               | UK          | primary and secondary care                                                                                         | 90/115<br>44.1%/55.9%                                                          | 205                                       | Consecutive | 65.7% 205/312 who contacted the recruitment helpline          | Private not for profit/ Health Foundation (UK)                                           |
| Utens 2012     | Utility       | EQ-5D                             | Randomized controlled trial | EQ-5D                              | Mean (SD) usual hospital group 67.8 (11.3); early assisted discharge 68.31 (10.34) | Netherlands | hospitalized patients first and discharge later                                                                    | usual hospital: 38/31 55.1%/44.9%, early assisted discharge: 48/22 68.6%/31.4% | 139                                       | Consecutive | 139 of 479 (29.0%) randomized, 115 of 139 finished the survey | Governmental/ Netherlands Organization for Health Research and Development (945-50-7730) |
| Utens 2013     | Direct choice | Forced choice: place of treatment | Randomized controlled trial | no description                     | Mean (SD) usual hospital group 67.8 (11.3); early assisted discharge 68.31 (10.34) | Netherlands | hospitalized patients first and discharge later                                                                    | usual hospital: 38/31 55.1%/44.9%, early assisted discharge: 48/22 68.6%/31.4% | 139                                       | Consecutive | 139 of 479 (29.0%)                                            | Governmental/ Netherlands Organization for Health Research and Development (945-50-7730) |
| Utens 2014     | Direct choice | Forced choice: place of treatment | Randomized controlled trial | no description                     | Not reported                                                                       | Netherlands | hospitalized patients first and discharge later                                                                    | usual hospital: 38/31 55.1%/44.9%, early assisted discharge: 48/22 68.6%/31.4% | 124 (62 caregivers each in either groups) | Consecutive | not reported                                                  | Governmental/ Netherlands Organization for Health Research and Development (945-50-7730) |

|                     |                                     |                                                                                                          |                             |                                    |                                                                                   |                         |                                                                                                        |                                                                                             |                        |              |                                                                        |                                                                                                                                                         |
|---------------------|-------------------------------------|----------------------------------------------------------------------------------------------------------|-----------------------------|------------------------------------|-----------------------------------------------------------------------------------|-------------------------|--------------------------------------------------------------------------------------------------------|---------------------------------------------------------------------------------------------|------------------------|--------------|------------------------------------------------------------------------|---------------------------------------------------------------------------------------------------------------------------------------------------------|
| van Boven 2016      | Utility                             | VAS, EQ-5D utility                                                                                       | Pre-test/post-test design   | EQ-5D                              | 68.8 (7.8)                                                                        | The Netherlands         | primary care                                                                                           | 52.2%/47.8%                                                                                 | 88                     | not reported | 88/94 = 93.6%                                                          | For the implementation of the study the authors' institution (University of Groningen) received an unrestricted educational grant from AstraZeneca Ltd. |
| van den Bemt 2009   | Utility                             | EQ-5D                                                                                                    | Randomized controlled trial | EQ-5D                              | monitoring group: 62(10.5); usual care group 64 (10.5)                            | Netherlands             | general practice                                                                                       | monitoring group: 56/26 68.3%/31.7%; usual care: 47/41, 53.4%/46.6%                         | 170                    | Consecutive  | 170/286                                                                | Private not for profit/"Partners in Care Solutions for COPD" (PICASSO)                                                                                  |
| van der Palen 2013a | Direct choice, Uncategorized survey | Forced choice: inhaler, willingness to continue inhaler use scale, importance core of inhaler attributes | Randomized controlled trial | No description                     | Mean (SD) 65.9 (8.6) for the safety population, 65.7 (8.5) for the ITT population | Germany and Netherlands | Not reported                                                                                           | 87/42 67.4%/32.6% for the safety population, and 75/30 (71.4%/28.6%) for the ITT population | 129                    | Not reported | response rate unclear, 70.5% 91/105 patients indicating the preference | Private for profit/ Almirall, S.A., Barcelona, Spain, and Forest Laboratories, Inc., New York, USA                                                      |
| van der Palen 2013b | Direct choice, Uncategorized survey | Forced choice: inhaler, willingness to continue inhaler use scale, importance core of inhaler attributes | Randomized controlled trial | Narrative explained by interviewer | Mean (SD) 65.3 (9.8) for overall (both asthma and COPD)                           | Netherlands             | unclear / Medisch Spectrum Twente Hospital at Enschede, and Gelre Hospital at Zutphen, the Netherlands | 52/61 46%/56% for overall study population                                                  | 113, while 82 for COPD | Not reported | UNCLEAR                                                                | Private for profit/ Glaxo Smith Kline, Zeist, the Netherlands.                                                                                          |
| van der Palen 2016  | Direct choice                       | Forced choice: inhaler                                                                                   | Cross-over study            | No description                     | 67.3 (8.3)                                                                        | Netherlands, UK         | not reported                                                                                           | 342/ 225 (60%/40%)                                                                          | 567                    | not reported | not reported                                                           | These studies were funded by GSK (GSK study numbers, 200301 and 200330; clinical trials.gov number, NCT02184624 and NCT02195284).                       |

|                    |                        |                               |                             |                |                                                                                                                                                       |                                                                                                                                                 |                                                                                 |                                                                                                                        |                                                                                                                                      |              |                            |                                                                                                                                                                                                                                         |
|--------------------|------------------------|-------------------------------|-----------------------------|----------------|-------------------------------------------------------------------------------------------------------------------------------------------------------|-------------------------------------------------------------------------------------------------------------------------------------------------|---------------------------------------------------------------------------------|------------------------------------------------------------------------------------------------------------------------|--------------------------------------------------------------------------------------------------------------------------------------|--------------|----------------------------|-----------------------------------------------------------------------------------------------------------------------------------------------------------------------------------------------------------------------------------------|
| van der Valk 2002  | Utility                | VAS                           | Randomized controlled trial | EQ-5D          | Mean (SD) Fluticasone propionate group: 64.1 (6.8); placebo: 64.0 (7.7)                                                                               | USA                                                                                                                                             | outpatient                                                                      | 84.0% 205/39, Fluticasone propionate: 104/19; placebo: 101/20                                                          | 244                                                                                                                                  | Not reported | 47.9% 244 of 509           | Governmental and Private for Profit/ Netherlands Asthma Foundation, Amicon Health Insurance Co., Boehringer Ingelheim, and GlaxoSmithKline BV.                                                                                          |
| Vestbo 2014        | Utility                | EQ-5D                         | Cross-sectional survey      | EQ-5D          | (mean)<br>1. GOLD category A (n=152): 62.0<br>2. GOLD category B (n=739): 63.5<br>3. GOLD category C (n=13): 60.2<br>4. GOLD category D (n=604): 67.3 | Five European countries (France, Germany, Italy, Spain and UK) and United States                                                                | Primary (primary care physician and pulmonologist-referred). Outpatient clinics | NR                                                                                                                     | 1508 patients<br>1. GOLD category A (n=152)<br>2. GOLD category B (n=739)<br>3. GOLD category C (n=13)<br>4. GOLD category D (n=604) | Consecutive  | 1508/3813 = 39.55%         | Writing support was funded by Novartis.                                                                                                                                                                                                 |
| Villar Balboa 2014 | Utility                | VAS                           | Cross-sectional survey      | EQ-5D          | 71 (10.6)                                                                                                                                             | Spain                                                                                                                                           | unclear                                                                         | 82/16                                                                                                                  | 98                                                                                                                                   | random       | 96.1% (98 of 102)          | not reported                                                                                                                                                                                                                            |
| Vogelmeier 2016    | Direct choice          | Forced choice: inhaler        | randomized controlled trial | No description | Acclidinium/formoterol 400/12 µg twice daily: 63.5 (8.1)<br>Salmeterol/fluticasone 50/500 µg twice daily: 63.3 (7.5)                                  | Austria, Bulgaria, Canada, Czech Republic, France, Germany, Hungary, Italy, Lithuania, Netherlands, Poland, South Africa, Spain, United Kingdom | not reported                                                                    | Acclidinium/formoterol 400/12 µg twice daily: 65.7%/34.3%<br>Salmeterol/fluticasone 50/500 µg twice daily: 64.4%/35.6% | 933                                                                                                                                  | not reported | 82.90%                     | This study was supported by Almirall SA, Barcelona, Spain. Medical writing support was provided by David Finch, Jessica Oliver-Bell and Jennifer Higginson of Complete Medical Communications (Macclesfield, UK), funded by AstraZeneca |
| Walters 2003       | Utility                | SF-6D                         | Cohort study                | SF-12/SF-36    | NR                                                                                                                                                    | NR                                                                                                                                              | NR                                                                              | NR                                                                                                                     | 60                                                                                                                                   | Not reported | NR                         | Not reported                                                                                                                                                                                                                            |
| Wildman 2009       | Utility, Direct choice | VAS, forced choice: treatment | Cohort study                | EQ-5D          | unclear 66.2 (9.9) from patient recruited in CMP                                                                                                      | UK                                                                                                                                              | hospitalized patients first and discharge later                                 | 316/332 48.8%/51.2% overall (both asthma and COPD)                                                                     | 752 COPD (832 in total)                                                                                                              | Consecutive  | 39.4% (648 of 1644) in CMP | Governmental/ MRC Health Services Research Fellowship                                                                                                                                                                                   |

|                |                                     |                                                                |                                         |                           |                                                                                                                               |             |                                                                    |                                                                                                                                  |     |                                                    |                                                                                    |                                                                                                                                                                                                                                                                                      |
|----------------|-------------------------------------|----------------------------------------------------------------|-----------------------------------------|---------------------------|-------------------------------------------------------------------------------------------------------------------------------|-------------|--------------------------------------------------------------------|----------------------------------------------------------------------------------------------------------------------------------|-----|----------------------------------------------------|------------------------------------------------------------------------------------|--------------------------------------------------------------------------------------------------------------------------------------------------------------------------------------------------------------------------------------------------------------------------------------|
| Wilke 2012     | Utility                             | EQ-5D, VAS                                                     | Cohort study                            | EQ-5D, SF-12/SF-36        | (mean (SD)):<br>1. Total sample (n=105): 66.3 (9.2)<br>2. Study completed (n=86): 65.7 (9.3)<br>3. Dropout (n=19): 68.8 (8.2) | Netherlands | Outpatient clinic                                                  | (male - n (%)):<br>1. Total sample (n=105): 65 (61.9%)<br>2. Study completed (n=86): 54 (62.8%)<br>3. Dropout (n=19): 11 (57.9%) | 105 | Consecutive                                        | Response rate NR. Follow-up complete for 86 (81.90%) patients in the total sample. | Proteion Thuis, Horn, The Netherlands; CRO+, Horn, The Netherlands; Grants 3.4.10.015 (S. Wilke) and 3.4.06.082 (D.J.A. Janssen) of the Netherlands Asthma Foundation, Leusden, The Netherlands; Stichting Wetenschapsbevordering Verpleeghuiszorg (SWBV), Utrecht, The Netherlands. |
| Wilson 2005    | Direct choice, Uncategorized survey | Forced choice: treatment, importance of mechanical ventilation | Trial, non-randomized or non-controlled | SF-12/SF-36, Decision aid | Mean 68.4, range: 37-68 years<br>Mean (SD) Forego MV (n=23) 71.0 (8.6); uncertain/Accept MV (n=10): 62.4 (15.4)               | Canada      | Outpatients who participated in a pulmonary rehabilitation program | 15/8 (65%/35%) for those forego MV, and 3/7 (30%/70%) for those uncertain/accept MV                                              | 33  | Consecutive                                        | 93 of 120 was contacted, 78%; 38 of the 93 agreed, 41%                             | Governmental/Research Development Fund of The Rehabilitation Centre and by an Ontario Thoracic Society Block Term grant.                                                                                                                                                             |
| Wilson 2007    | Direct choice                       | Forced choice: device                                          | Randomized controlled trial             | no description            | unclear (>50 years old)                                                                                                       | UK          | secondary care                                                     | Unclear                                                                                                                          | 30  | Not reported                                       | unclear                                                                            | Private for profit/ Glaxo Smith Kline, Zeist, the Netherlands.                                                                                                                                                                                                                       |
| Wu 2015        | Utility                             | VAS, EQ-5D utility                                             | Cross-sectional study                   | EQ-5D                     | Median, Mean (SD): 71.8, 70.4 (10.1)                                                                                          | China       | community                                                          | 494/184 (72.9%/21.1%)                                                                                                            | 678 | not reported                                       | 94% (678 of 721)                                                                   | This study was sponsored by Novartis (China) Investment Co. Ltd and supported by Shanghai Leading Academic Discipline Project of Public Health (Project Number: 12GWZK0101)                                                                                                          |
| Youngmi-2011   | Utility                             | EQ-5D                                                          | Cross-sectional                         | EQ-5D                     | UNCLEAR for COPD                                                                                                              | Korea       | Unclear                                                            | UNCLEAR                                                                                                                          | 217 | stratified multistage clustered probability design | unclear                                                                            | Unclear                                                                                                                                                                                                                                                                              |
| Yun Kirby 2016 | Direct choice                       | Forced choice: inhaler                                         | Cross-over study                        | no description            | mean: 64.7 (SD: 9.74), range: 39-89                                                                                           | US          | not reported                                                       | 53%/47% (153/134)                                                                                                                | 287 | not reported                                       | 283/287 = 98.6%                                                                    | This study was funded by GSK (study number RLV116669; ClinicalTrials.gov number NCT01868009).                                                                                                                                                                                        |

|               |         |                    |                        |       |                                    |        |                                                                                                                                                                 |                      |     |              |                                                              |                                                                                                  |
|---------------|---------|--------------------|------------------------|-------|------------------------------------|--------|-----------------------------------------------------------------------------------------------------------------------------------------------------------------|----------------------|-----|--------------|--------------------------------------------------------------|--------------------------------------------------------------------------------------------------|
| Zanaboni 2017 | Utility | VAS, EQ-5D utility | Cohort study           | EQ-5D | mean: 55.2 (SD: 6.1), range: 48–69 | Norway | the Norwegian Centre for Integrated Care and Telemedicine (NST), University Hospital of North Norway (UNN) and the rehabilitation centre LHL-klinikkene Skibotn | Males: 5, Females: 5 | 10  | not reported | 100% (a pilot study)                                         | The study was funded by the Northern Norway Regional Health Authority (grant number HST1014-11). |
| Zanini 2014   | Utility | VAS                | cross-sectional survey | EQ-5D | 71 (8)                             | Italy  | in-patient, rehabilitation center                                                                                                                               | 364/75 (82.9%/17.1%) | 439 | Consecutive  | unclear/retrospective analysis, not sure about the exclusion | No extramural funding was used to support this study                                             |
