# Supplementary material
Source: HighWire-hosted journal article supplement (https://erj.ersjournals.com/content/52/1/1800222)
Supplement: inline-supplementary-material-4 [file inline-supplementary-material-4.pdf]

Supplementary Table 2. Summary of risk of bias

| Study ID                   | Measurement tool selection | Participants' understanding of the measurement tool | Description of health states | Sampling Strategy     | Response rate (if follow up involved, please also record the completion rate of follow up) | Statistical analysis  |
|----------------------------|----------------------------|-----------------------------------------------------|------------------------------|-----------------------|--------------------------------------------------------------------------------------------|-----------------------|
| Agh 2011                   | Low risk of bias           | Moderate risk of bias                               | low risk of bias             | Low risk of bias      | Low risk of bias                                                                           | NA/ Low risk of bias  |
| Alcazar 2012               | Low risk of bias           | Moderate risk of bias                               | low risk of bias             | Moderate risk of bias | Moderate risk of bias                                                                      | NA/ Low risk of bias  |
| Allen-Ramey 2012           | low risk of bias           | Moderate risk of bias                               | low risk of bias             | low risk of bias      | Moderate risk of bias                                                                      | NA/ Low risk of bias  |
| Antoniou 2014              | low risk of bias           | Moderate risk of bias                               | low risk of bias             | low risk of bias      | Moderate risk of bias                                                                      | NA/ Low risk of bias  |
| Arne 2009                  | low risk of bias           | Moderate risk of bias                               | low risk of bias             | low risk of bias      | Low risk of bias                                                                           | NA/ Low risk of bias  |
| Berkius 2013               | low risk of bias           | Moderate risk of bias                               | low risk of bias             | low risk of bias      | low risk of bias                                                                           | NA/ Low risk of bias  |
| Boland 2014                | low risk of bias           | Moderate risk of bias                               | low risk of bias             | Moderate risk of bias | Serious risk of bias                                                                       | NA/ Low risk of bias  |
| Boland 2015                | low risk of bias           | Moderate risk of bias                               | low risk of bias             | Moderate risk of bias | Moderate risk of bias                                                                      | NA/ Low risk of bias  |
| Boland 2016                | Low risk of bias           | Moderate risk of bias                               | Low risk of bias             | Moderate risk of bias | Moderate risk of bias                                                                      | NA/ Low risk of bias  |
| Borge 2014                 | Serious risk of bias       | Moderate risk of bias                               | low risk of bias             | low risk of bias      | Serious risk of bias                                                                       | NA/ Low risk of bias  |
| Boros 2012                 | low risk of bias           | Moderate risk of bias                               | low risk of bias             | Serious risk of bias  | low risk of bias                                                                           | NA/ Low risk of bias  |
| Bourbeau 2007              | low risk of bias           | Moderate risk of bias                               | low risk of bias             | Moderate risk of bias | Moderate risk of bias                                                                      | NA/ Low risk of bias  |
| Braido 2016                | Serious risk of bias       | Moderate risk of bias                               | Moderate risk of bias        | Low risk of bias      | Low risk of bias                                                                           | NA/ Low risk of bias  |
| Bratas 2010                | Serious risk of bias       | Moderate risk of bias                               | low risk of bias             | low risk of bias      | low risk of bias                                                                           | NA/ Low risk of bias  |
| Brophy 2008                | Serious risk of bias       | Moderate risk of bias                               | Moderate risk of bias        | Moderate risk of bias | low risk of bias                                                                           | NA/ Low risk of bias  |
| Bulcun 2014                | Low risk of bias           | Moderate risk of bias                               | low risk of bias             | low risk of bias      | Moderate risk of bias                                                                      | Moderate risk of bias |
| Burns 2016                 | Low risk of bias           | Moderate risk of bias                               | Low risk of bias             | Moderate risk of bias | Low risk of bias                                                                           | NA/ Low risk of bias  |
| Carlucci 2016              | Serious risk of bias       | Moderate risk of bias                               | Low risk of bias             | Moderate risk of bias | Low risk of bias                                                                           | NA/ Low risk of bias  |
| Chakrabarti 2009           | Serious risk of bias       | Moderate risk of bias                               | low risk of bias             | low risk of bias      | low risk of bias                                                                           | NA/ Low risk of bias  |
| Chapman 1993               | Serious risk of bias       | Moderate risk of bias                               | low risk of bias             | Serious risk of bias  | Moderate risk of bias                                                                      | NA/ Low risk of bias  |
| Chapman 2011               | Serious risk of bias       | Moderate risk of bias                               | low risk of bias             | Moderate risk of bias | Moderate risk of bias                                                                      | NA/ Low risk of bias  |
| Chen 2014                  | low risk of bias           | Moderate risk of bias                               | low risk of bias             | low risk of bias      | low risk of bias                                                                           | NA/ Low risk of bias  |
| Chen 2016                  | Low risk of bias           | Moderate risk of bias                               | Low risk of bias             | Moderate risk of bias | Low risk of bias                                                                           | NA/ Low risk of bias  |
| Chou 2017                  | Serious risk of bias       | Moderate risk of bias                               | Moderate risk of bias        | Serious risk of bias  | Low risk of bias                                                                           | NA/ Low risk of bias  |
| Chrystyn 2014              | low risk of bias           | Moderate risk of bias                               | low risk of bias             | Serious risk of bias  | Serious risk of bias                                                                       | NA/ Low risk of bias  |
| Claessens 2000             | Serious risk of bias       | Moderate risk of bias                               | Moderate risk of bias        | low risk of bias      | low risk of bias                                                                           | NA/ Low risk of bias  |
| Cleland 2007               | low risk of bias           | Moderate risk of bias                               | low risk of bias             | low risk of bias      | Serious risk of bias                                                                       | NA/ Low risk of bias  |
| Collado-Mateo 2017         | low risk of bias           | Moderate risk of bias                               | low risk of bias             | low risk of bias      | low risk of bias                                                                           | NA/ Low risk of bias  |
| Cross 2010                 | low risk of bias           | Moderate risk of bias                               | low risk of bias             | low risk of bias      | low risk of bias                                                                           | NA/ Low risk of bias  |
| Dacosta Dibonaventura 2017 | low risk of bias           | Moderate risk of bias                               | low risk of bias             | low risk of bias      | Moderate risk of bias                                                                      | NA/ Low risk of bias  |
| Dal Negro 2016             | Serious risk of bias       | Moderate risk of bias                               | Low risk of bias             | Low risk of bias      | Moderate risk of bias                                                                      | NA/ Low risk of bias  |
| Dales 1999                 | low risk of bias           | Moderate risk of bias                               | low risk of bias             | low risk of bias      | low risk of bias                                                                           | NA/ Low risk of bias  |
| Decramer 2001              | low risk of bias           | Moderate risk of bias                               | low risk of bias             | Moderate risk of bias | Moderate risk of bias                                                                      | NA/ Low risk of bias  |
| DiBonaventura 2017         | low risk of bias           | Moderate risk of bias                               | low risk of bias             | low risk of bias      | Moderate risk of bias                                                                      | NA/ Low risk of bias  |
| Ding 2017                  | Low risk of bias           | Moderate risk of bias                               | Low risk of bias             | Serious risk of bias  | Serious risk of bias                                                                       | NA/ Low risk of bias  |
| Doñate-Martínez 2017       | Low risk of bias           | Moderate risk of bias                               | Low risk of bias             | Low risk of bias      | Low risk of bias                                                                           | NA/ Low risk of bias  |
| Downey 2009                | Serious risk of bias       | Moderate risk of bias                               | Moderate risk of bias        | Moderate risk of bias | Moderate risk of bias                                                                      | NA/ Low risk of bias  |
| Downey 2013                | Serious risk of bias       | Moderate risk of bias                               | low risk of bias             | Moderate risk of bias | low risk of bias                                                                           | NA/ Low risk of bias  |
| Dowson 2004                | low risk of bias           | Moderate risk of bias                               | low risk of bias             | low risk of bias      | low risk of bias                                                                           | NA/ Low risk of bias  |

|                      |                      |                       |                       |                       |                       |                      |
|----------------------|----------------------|-----------------------|-----------------------|-----------------------|-----------------------|----------------------|
| Eakin 1997           | Serious risk of bias | low risk of bias      | low risk of bias      | Serious risk of bias  | low risk of bias      | NA/ Low risk of bias |
| Egan 2012            | low risk of bias     | Moderate risk of bias | low risk of bias      | low risk of bias      | low risk of bias      | NA/ Low risk of bias |
| Eskander 2011        | low risk of bias     | Moderate risk of bias | low risk of bias      | low risk of bias      | low risk of bias      | NA/ Low risk of bias |
| Farmer 2017          | low risk of bias     | Moderate risk of bias | low risk of bias      | Serious risk of bias  | low risk of bias      | NA/ Low risk of bias |
| Ferreira 2014        | low risk of bias     | Moderate risk of bias | low risk of bias      | low risk of bias      | Moderate risk of bias | NA/ Low risk of bias |
| Fishwick 2014        | low risk of bias     | Moderate risk of bias | low risk of bias      | low risk of bias      | Moderate risk of bias | NA/ Low risk of bias |
| Fletcher 2011        | low risk of bias     | Moderate risk of bias | low risk of bias      | low risk of bias      | low risk of bias      | NA/ Low risk of bias |
| Fox 1999             | Serious risk of bias | Moderate risk of bias | low risk of bias      | low risk of bias      | low risk of bias      | NA/ Low risk of bias |
| Fried 2002           | low risk of bias     | Moderate risk of bias | low risk of bias      | low risk of bias      | low risk of bias      | NA/ Low risk of bias |
| Fried 2007           | low risk of bias     | Moderate risk of bias | low risk of bias      | low risk of bias      | low risk of bias      | NA/ Low risk of bias |
| Gaber 2004           | Serious risk of bias | Moderate risk of bias | low risk of bias      | Moderate risk of bias | Moderate risk of bias | NA/ Low risk of bias |
| Galaznik 2013        | low risk of bias     | Moderate risk of bias | low risk of bias      | low risk of bias      | Moderate risk of bias | NA/ Low risk of bias |
| García-Gordillo 2012 | low risk of bias     | Moderate risk of bias | low risk of bias      | low risk of bias      | low risk of bias      | NA/ Low risk of bias |
| García-Polo 2012     | low risk of bias     | Moderate risk of bias | low risk of bias      | low risk of bias      | low risk of bias      | NA/ Low risk of bias |
| Gillespie 2013       | low risk of bias     | Moderate risk of bias | low risk of bias      | Moderate risk of bias | Moderate risk of bias | NA/ Low risk of bias |
| Goossens 2011        | low risk of bias     | Moderate risk of bias | low risk of bias      | Moderate risk of bias | low risk of bias      | NA/ Low risk of bias |
| Goossens 2014        | low risk of bias     | Moderate risk of bias | low risk of bias      | Moderate risk of bias | low risk of bias      | Low risk of bias     |
| Gruenberger 2011     | Low risk of bias     | Moderate risk of bias | Low risk of bias      | Serious risk of bias  | Serious risk of bias  | NA/ Low risk of bias |
| Guyatt 1999          | low risk of bias     | Moderate risk of bias | low risk of bias      | low risk of bias      | low risk of bias      | NA/ Low risk of bias |
| Gvozdenovic 2007     | low risk of bias     | Moderate risk of bias | low risk of bias      | Moderate risk of bias | Moderate risk of bias | NA/ Low risk of bias |
| Hanada 2015          | Serious risk of bias | Moderate risk of bias | Moderate risk of bias | Moderate risk of bias | Moderate risk of bias | NA/ Low risk of bias |
| Hansen 1990          | Serious risk of bias | Moderate risk of bias | Moderate risk of bias | low risk of bias      | Moderate risk of bias | NA/ Low risk of bias |
| Hansen 1994          | low risk of bias     | Moderate risk of bias | Moderate risk of bias | low risk of bias      | Moderate risk of bias | NA/ Low risk of bias |
| Harper 1997          | low risk of bias     | Moderate risk of bias | low risk of bias      | Moderate risk of bias | low risk of bias      | NA/ Low risk of bias |
| Haughney 2005        | low risk of bias     | Moderate risk of bias | low risk of bias      | low risk of bias      | Moderate risk of bias | low risk of bias     |
| Hawken 2017          | low risk of bias     | Moderate risk of bias | low risk of bias      | Serious risk of bias  | Moderate risk of bias | low risk of bias     |
| Hernández 2013       | Serious risk of bias | Moderate risk of bias | low risk of bias      | low risk of bias      | low risk of bias      | NA/ Low risk of bias |
| Heyworth 2009        | low risk of bias     | Moderate risk of bias | low risk of bias      | Moderate risk of bias | Serious risk of bias  | NA/ Low risk of bias |
| Hohmeier 2016        | Serious risk of bias | Moderate risk of bias | Moderate risk of bias | Moderate risk of bias | Low risk of bias      | NA/ Low risk of bias |
| Hong 2015            | Low risk of bias     | Moderate risk of bias | Low risk of bias      | Low risk of bias      | Moderate risk of bias | NA/ Low risk of bias |
| Hoogendoorn 2011     | low risk of bias     | Moderate risk of bias | low risk of bias      | Moderate risk of bias | Moderate risk of bias | NA/ Low risk of bias |
| Hoyle 2016           | Low risk of bias     | Moderate risk of bias | Low risk of bias      | Moderate risk of bias | Low risk of bias      | Low risk of bias     |
| Hwang 2011           | Serious risk of bias | Moderate risk of bias | Moderate risk of bias | Moderate risk of bias | Moderate risk of bias | NA/ Low risk of bias |
| Hyland 2016          | Serious risk of bias | Moderate risk of bias | Low risk of bias      | Moderate risk of bias | Moderate risk of bias | NA/ Low risk of bias |
| Jakobsen 2015        | Low risk of bias     | Moderate risk of bias | Low risk of bias      | Low risk of bias      | Serious risk of bias  | NA/ Low risk of bias |
| Janssen 2011a        | low risk of bias     | Moderate risk of bias | low risk of bias      | Moderate risk of bias | low risk of bias      | NA/ Low risk of bias |
| Janssen 2011c        | Serious risk of bias | Moderate risk of bias | Moderate risk of bias | low risk of bias      | Moderate risk of bias | NA/ Low risk of bias |
| Janssen 2014         | low risk of bias     | Moderate risk of bias | low risk of bias      | Serious risk of bias  | low risk of bias      | NA/ Low risk of bias |
| Jarvis 2007          | Serious risk of bias | Moderate risk of bias | low risk of bias      | low risk of bias      | Moderate risk of bias | NA/ Low risk of bias |
| Jassen 2011b         | low risk of bias     | Moderate risk of bias | low risk of bias      | Moderate risk of bias | low risk of bias      | NA/ Low risk of bias |
| Jia 2016             | Low risk of bias     | Moderate risk of bias | Low risk of bias      | Low risk of bias      | Moderate risk of bias | NA/ Low risk of bias |
| Jordan 2014          | Serious risk of bias | Moderate risk of bias | low risk of bias      | low risk of bias      | Moderate risk of bias | NA/ Low risk of bias |
| Katajisto 2012       | low risk of bias     | Moderate risk of bias | low risk of bias      | Moderate risk of bias | low risk of bias      | NA/ Low risk of bias |
| Katula 2004          | Serious risk of bias | Moderate risk of bias | low risk of bias      | low risk of bias      | low risk of bias      | NA/ Low risk of bias |
| Kawata 2014          | low risk of bias     | Moderate risk of bias | low risk of bias      | Serious risk of bias  | low risk of bias      | low risk of bias     |



|                    |                      |                       |                       |                       |                       |                      |
|--------------------|----------------------|-----------------------|-----------------------|-----------------------|-----------------------|----------------------|
| Norris 2005        | Serious risk of bias | Moderate risk of bias | low risk of bias      | low risk of bias      | low risk of bias      | NA/ Low risk of bias |
| Nyman 2007         | low risk of bias     | Moderate risk of bias | Moderate risk of bias | Moderate risk of bias | Moderate risk of bias | NA/ Low risk of bias |
| O'Reilly 2007      | low risk of bias     | Moderate risk of bias | low risk of bias      | low risk of bias      | Serious risk of bias  | NA/ Low risk of bias |
| Ohno 2014          | Serious risk of bias | Moderate risk of bias | low risk of bias      | Moderate risk of bias | low risk of bias      | NA/ Low risk of bias |
| Ojoo 2002          | Serious risk of bias | Moderate risk of bias | Moderate risk of bias | Serious risk of bias  | low risk of bias      | NA/ Low risk of bias |
| Oliver 1997        | Serious risk of bias | Moderate risk of bias | low risk of bias      | Moderate risk of bias | Moderate risk of bias | NA/ Low risk of bias |
| Olszanecka-Glinia  | Serious risk of bias | Moderate risk of bias | Moderate risk of bias | low risk of bias      | Moderate risk of bias | NA/ Low risk of bias |
| Osman 2008         | low risk of bias     | Moderate risk of bias | low risk of bias      | Moderate risk of bias | Serious risk of bias  | NA/ Low risk of bias |
| Pallin 2012        | low risk of bias     | Moderate risk of bias | low risk of bias      | low risk of bias      | low risk of bias      | NA/ Low risk of bias |
| Park 2015          | Low risk of bias     | Moderate risk of bias | Low risk of bias      | Low risk of bias      | Moderate risk of bias | NA/ Low risk of bias |
| Pascual 2015       | Serious risk of bias | Moderate risk of bias | Moderate risk of bias | Moderate risk of bias | Moderate risk of bias | NA/ Low risk of bias |
| Paterson 2000      | low risk of bias     | Moderate risk of bias | low risk of bias      | low risk of bias      | low risk of bias      | NA/ Low risk of bias |
| Patridge 2011      | Serious risk of bias | Moderate risk of bias | Moderate risk of bias | low risk of bias      | low risk of bias      | NA/ Low risk of bias |
| Persson 2005       | Serious risk of bias | Moderate risk of bias | low risk of bias      | low risk of bias      | low risk of bias      | NA/ Low risk of bias |
| Peters 2014a       | low risk of bias     | Moderate risk of bias | low risk of bias      | Moderate risk of bias | Serious risk of bias  | NA/ Low risk of bias |
| Pickard 2011       | low risk of bias     | Moderate risk of bias | low risk of bias      | Moderate risk of bias | Moderate risk of bias | NA/ Low risk of bias |
| Pisa 2013          | low risk of bias     | Moderate risk of bias | low risk of bias      | Moderate risk of bias | Moderate risk of bias | low risk of bias     |
| Polati 2012        | Serious risk of bias | Moderate risk of bias | low risk of bias      | Moderate risk of bias | Moderate risk of bias | NA/ Low risk of bias |
| Price 2013a        | low risk of bias     | Moderate risk of bias | low risk of bias      | low risk of bias      | Moderate risk of bias | NA/ Low risk of bias |
| Price 2013b        | Serious risk of bias | Moderate risk of bias | Moderate risk of bias | Moderate risk of bias | Serious risk of bias  | NA/ Low risk of bias |
| Puente-Maestu 2012 | Low risk of bias     | Moderate risk of bias | Low risk of bias      | Low risk of bias      | Moderate risk of bias | NA/ Low risk of bias |
| Puhan 2004         | low risk of bias     | Moderate risk of bias | low risk of bias      | low risk of bias      | low risk of bias      | NA/ Low risk of bias |
| Puhan 2007         | low risk of bias     | Moderate risk of bias | low risk of bias      | Moderate risk of bias | Moderate risk of bias | NA/ Low risk of bias |
| Punekar 2007       | low risk of bias     | Moderate risk of bias | low risk of bias      | low risk of bias      | low risk of bias      | NA/ Low risk of bias |
| Reinke 2011        | Serious risk of bias | Moderate risk of bias | low risk of bias      | low risk of bias      | Serious risk of bias  | NA/ Low risk of bias |
| Reinke 2013        | Serious risk of bias | Moderate risk of bias | Moderate risk of bias | Moderate risk of bias | Serious risk of bias  | NA/ Low risk of bias |
| Rhee 2017          | Low risk of bias     | Moderate risk of bias | Low risk of bias      | Low risk of bias      | Moderate risk of bias | NA/ Low risk of bias |
| Riley 2016         | Serious risk of bias | Moderate risk of bias | Moderate risk of bias | Moderate risk of bias | Moderate risk of bias | NA/ Low risk of bias |
| Ringbaek 2008      | low risk of bias     | Moderate risk of bias | low risk of bias      | Moderate risk of bias | low risk of bias      | NA/ Low risk of bias |
| Rinnenburger 2013  | Serious risk of bias | Moderate risk of bias | low risk of bias      | Moderate risk of bias | Moderate risk of bias | NA/ Low risk of bias |
| Rocker 2008        | Serious risk of bias | Moderate risk of bias | low risk of bias      | Moderate risk of bias | Moderate risk of bias | NA/ Low risk of bias |
| Rocker 2013        | Serious risk of bias | Moderate risk of bias | Moderate risk of bias | Moderate risk of bias | low risk of bias      | NA/ Low risk of bias |
| Rodriguez Gonzalez | low risk of bias     | Moderate risk of bias | low risk of bias      | Moderate risk of bias | Moderate risk of bias | NA/ Low risk of bias |
| Rutten van Molke   | low risk of bias     | Moderate risk of bias | low risk of bias      | low risk of bias      | Moderate risk of bias | NA/ Low risk of bias |
| Rutten van Molke   | low risk of bias     | Moderate risk of bias | low risk of bias      | Moderate risk of bias | low risk of bias      | NA/ Low risk of bias |
| Sassi-Dambron 1999 | low risk of bias     | Moderate risk of bias | low risk of bias      | Serious risk of bias  | Moderate risk of bias | NA/ Low risk of bias |
| Scharf 2011        | low risk of bias     | Moderate risk of bias | low risk of bias      | Moderate risk of bias | low risk of bias      | NA/ Low risk of bias |
| Schunemann 2005    | low risk of bias     | low risk of bias      | low risk of bias      | low risk of bias      | low risk of bias      | NA/ Low risk of bias |
| Schunemann 2006    | low risk of bias     | Serious risk of bias  | low risk of bias      | low risk of bias      | Moderate risk of bias | NA/ Low risk of bias |
| Seymour 2010       | low risk of bias     | Moderate risk of bias | low risk of bias      | Moderate risk of bias | Moderate risk of bias | NA/ Low risk of bias |
| Sharafkhaneh 2011  | Serious risk of bias | Moderate risk of bias | Moderate risk of bias | low risk of bias      | Serious risk of bias  | NA/ Low risk of bias |
| Siler 2014         | Serious risk of bias | Moderate risk of bias | Moderate risk of bias | Moderate risk of bias | Moderate risk of bias | NA/ Low risk of bias |
| Simon 2013         | Serious risk of bias | Moderate risk of bias | Moderate risk of bias | Serious risk of bias  | Moderate risk of bias | NA/ Low risk of bias |
| Small 2015         | Low risk of bias     | Moderate risk of bias | Low risk of bias      | Low risk of bias      | Moderate risk of bias | NA/ Low risk of bias |
| Solem 2013         | low risk of bias     | Moderate risk of bias | low risk of bias      | low risk of bias      | Moderate risk of bias | NA/ Low risk of bias |

|                     |                      |                       |                       |                       |                       |                      |
|---------------------|----------------------|-----------------------|-----------------------|-----------------------|-----------------------|----------------------|
| Sorensen 2016       | Low risk of bias     | Moderate risk of bias | Low risk of bias      | Moderate risk of bias | Low risk of bias      | NA/ Low risk of bias |
| Spencer 2013        | Serious risk of bias | Moderate risk of bias | Moderate risk of bias | Moderate risk of bias | low risk of bias      | NA/ Low risk of bias |
| Stahl 2005          | low risk of bias     | Moderate risk of bias | low risk of bias      | Moderate risk of bias | low risk of bias      | NA/ Low risk of bias |
| Stapleton 2005      | Serious risk of bias | Moderate risk of bias | low risk of bias      | low risk of bias      | Serious risk of bias  | NA/ Low risk of bias |
| Starkie 2011        | low risk of bias     | Moderate risk of bias | low risk of bias      | Moderate risk of bias | Moderate risk of bias | NA/ Low risk of bias |
| Stavem 1999         | low risk of bias     | Moderate risk of bias | low risk of bias      | low risk of bias      | low risk of bias      | NA/ Low risk of bias |
| Stavem 2002a        | low risk of bias     | low risk of bias      | low risk of bias      | low risk of bias      | Serious risk of bias  | NA/ Low risk of bias |
| Stavem 2002b        | low risk of bias     | low risk of bias      | low risk of bias      | low risk of bias      | Serious risk of bias  | NA/ Low risk of bias |
| Stein 2009          | low risk of bias     | Moderate risk of bias | low risk of bias      | low risk of bias      | Serious risk of bias  | NA/ Low risk of bias |
| Steuten 2006        | low risk of bias     | Moderate risk of bias | low risk of bias      | low risk of bias      | low risk of bias      | NA/ Low risk of bias |
| Stoddart 2015       | Low risk of bias     | Moderate risk of bias | Low risk of bias      | Low risk of bias      | Moderate risk of bias | NA/ Low risk of bias |
| Sundh 2015          | Low risk of bias     | Moderate risk of bias | Low risk of bias      | Low risk of bias      | Moderate risk of bias | NA/ Low risk of bias |
| Sutherland 2009     | Serious risk of bias | Moderate risk of bias | low risk of bias      | Moderate risk of bias | low risk of bias      | NA/ Low risk of bias |
| Svedsater 2013      | Serious risk of bias | Moderate risk of bias | low risk of bias      | Moderate risk of bias | Moderate risk of bias | NA/ Low risk of bias |
| Szende 2009         | low risk of bias     | Moderate risk of bias | low risk of bias      | Moderate risk of bias | Moderate risk of bias | NA/ Low risk of bias |
| Tabak 2014          | low risk of bias     | Moderate risk of bias | low risk of bias      | Moderate risk of bias | Serious risk of bias  | NA/ Low risk of bias |
| Taylor 2012         | low risk of bias     | Moderate risk of bias | low risk of bias      | low risk of bias      | Serious risk of bias  | NA/ Low risk of bias |
| Torrance 1999       | low risk of bias     | Moderate risk of bias | low risk of bias      | Moderate risk of bias | Serious risk of bias  | NA/ Low risk of bias |
| Torres-Sánchez 2015 | Low risk of bias     | Moderate risk of bias | Low risk of bias      | Low risk of bias      | Moderate risk of bias | NA/ Low risk of bias |
| Travaline 1995      | Serious risk of bias | Moderate risk of bias | low risk of bias      | low risk of bias      | low risk of bias      | NA/ Low risk of bias |
| Turner 2014         | low risk of bias     | Moderate risk of bias | low risk of bias      | low risk of bias      | low risk of bias      | NA/ Low risk of bias |
| Utens 2012          | low risk of bias     | Moderate risk of bias | low risk of bias      | low risk of bias      | Serious risk of bias  | NA/ Low risk of bias |
| Utens 2013          | Serious risk of bias | Moderate risk of bias | Moderate risk of bias | low risk of bias      | Serious risk of bias  | NA/ Low risk of bias |
| Utens 2014          | Serious risk of bias | Moderate risk of bias | Moderate risk of bias | low risk of bias      | Moderate risk of bias | NA/ Low risk of bias |
| van Boven 2016      | Low risk of bias     | Moderate risk of bias | Low risk of bias      | Moderate risk of bias | Low risk of bias      | NA/ Low risk of bias |
| van den Bemt 2009   | low risk of bias     | Moderate risk of bias | low risk of bias      | low risk of bias      | low risk of bias      | NA/ Low risk of bias |
| van der Palen 2011  | Serious risk of bias | Moderate risk of bias | Moderate risk of bias | Moderate risk of bias | Moderate risk of bias | NA/ Low risk of bias |
| van der Palen 2011  | Serious risk of bias | Moderate risk of bias | low risk of bias      | Moderate risk of bias | Moderate risk of bias | NA/ Low risk of bias |
| van der Palen 2011  | Serious risk of bias | Moderate risk of bias | Moderate risk of bias | Moderate risk of bias | Moderate risk of bias | NA/ Low risk of bias |
| van der Valk 2002   | low risk of bias     | Moderate risk of bias | low risk of bias      | Moderate risk of bias | Serious risk of bias  | NA/ Low risk of bias |
| Vestbo 2014         | low risk of bias     | Moderate risk of bias | low risk of bias      | low risk of bias      | Serious risk of bias  | NA/ Low risk of bias |
| Villar Balboa 2014  | low risk of bias     | Moderate risk of bias | low risk of bias      | low risk of bias      | Low risk of bias      | NA/ Low risk of bias |
| Vogelmeier 2016     | Serious risk of bias | Moderate risk of bias | Moderate risk of bias | Moderate risk of bias | Low risk of bias      | NA/ Low risk of bias |
| Walters 2003        | low risk of bias     | Moderate risk of bias | low risk of bias      | Moderate risk of bias | Moderate risk of bias | NA/ Low risk of bias |
| Wildman 2009        | low risk of bias     | Moderate risk of bias | low risk of bias      | low risk of bias      | Serious risk of bias  | NA/ Low risk of bias |
| Wilke 2012          | low risk of bias     | Moderate risk of bias | low risk of bias      | low risk of bias      | Moderate risk of bias | NA/ Low risk of bias |
| Wilson 2005         | Serious risk of bias | Moderate risk of bias | low risk of bias      | low risk of bias      | Serious risk of bias  | NA/ Low risk of bias |
| Wilson 2007         | Serious risk of bias | Moderate risk of bias | Moderate risk of bias | Moderate risk of bias | Moderate risk of bias | NA/ Low risk of bias |
| Wu 2015             | Low risk of bias     | Moderate risk of bias | Low risk of bias      | Moderate risk of bias | Low risk of bias      | NA/ Low risk of bias |
| Yong-Mi 2011        | low risk of bias     | Moderate risk of bias | low risk of bias      | low risk of bias      | Moderate risk of bias | NA/ Low risk of bias |
| Yun Kirby 2016      | Serious risk of bias | Moderate risk of bias | Moderate risk of bias | Moderate risk of bias | Low risk of bias      | NA/ Low risk of bias |
| Zanaboni 2017       | Low risk of bias     | Moderate risk of bias | Low risk of bias      | Moderate risk of bias | Low risk of bias      | NA/ Low risk of bias |
| Zanini 2014         | low risk of bias     | Moderate risk of bias | low risk of bias      | low risk of bias      | Moderate risk of bias | NA/ Low risk of bias |
