# Supplementary material
Source: HighWire-hosted journal article supplement (https://erj.ersjournals.com/content/52/1/1800222)
Supplement: inline-supplementary-material-5 [file inline-supplementary-material-5.pdf]

Supplementary Table 3. Quantitative results

| Study ID         | Instrum ent                       | Study design                | Sample size                                     | Reported format                                | Result                                                                                                                                                                                                                                                                         |
|------------------|-----------------------------------|-----------------------------|-------------------------------------------------|------------------------------------------------|--------------------------------------------------------------------------------------------------------------------------------------------------------------------------------------------------------------------------------------------------------------------------------|
| Bratas 2010      | forced choice: treatment          | Cross-sectional survey      | 205                                             | Choice or proportion of choice                 | A total of 161 patients chose inpatient rehabilitation and 44 chose outpatient clinics. The decision to choose rehabilitation may be determined by impaired health-related quality of life, psychological distress and lack of psychological support from a significant other. |
| Brophy 2008      | forced choice: inhaler            | Randomized controlled trial | 25                                              | Choice or proportion of choice                 | Preference for bronchodilator treatment nebulizer vs MDI and spacer : 15 patients vs 10 patients                                                                                                                                                                               |
| Bulcun 2014      | Conjoint analysis/Discrete choice | Cross-sectional survey      | 49                                              | Influence or contribution or weight of certain | Extent to which the doctor gives sufficient time to listen to the patient<br>RARELY: -1.5<br>SOMETIME: -0.5                                                                                                                                                                    |
| Carlucci 2016    | Forced choice: treatment          | Cross-sectional study       | 55                                              | Odds ratio and 95% CI                          | OR of choice of NIV as a 'ceiling' treatment for a current use of NIV: OR = 4.93, 95% CI = 1.17–23.54<br>OR of choice of NIV as a 'ceiling' treatment for a recent family bereavement: OR = 4.77, 95% CI = 1.12–22.95, p = 0.026                                               |
| Chakrabarti 2009 | forced choice: treatment          | Cross-sectional survey      | 50                                              | Choice or proportion of choice                 | Willingness to accept a IMV during an exacerbation after stage 4:<br>60% (30/50) willing,<br>30% (15/50) unwilling.                                                                                                                                                            |
| Chapman 1993     | forced choice: inhaler            | Cross-sectional survey      | 80                                              | Choice or proportion of choice                 | preference for breath actuated device vs conventional MDI: 71.3% vs 18.8% vs 10% no preference<br>MDI familiar group: 72.5% vs 15% vs 12.5% no preference<br>MDI unfamiliar group: 70% vs 22.5% vs 7.5% no difference                                                          |
| Chapman 2011     | forced choice: inhaler            | Randomized controlled trial | 82                                              | Choice or proportion of choice                 | overall preference for Breezhaler vs Handihaler vs no preference: 60.5% vs 30.9% vs 8.6%<br>Remove/open cap: 58.0% vs 19.8% vs 22.2%<br>Open mouthpiece: 64.2% vs 9.9% vs 25.9%                                                                                                |
| Chen 2016        | EQ-5D utility, willingness to pay | Cross-sectional study       | 142                                             | Mean (SD), Mean (SE)                           | COPD: 0.84 (0.21)<br>mild COPD: 0.88 (0.20)<br>moderate COPD: 0.89 (0.16)<br>severe COPD: 0.79 (0.20)                                                                                                                                                                          |
| Claessens 2000   | Forced choice: treatment          | Cohort study                | 1008                                            | Choice or proportion of choice                 | Preference for treatment focusing on relieving pain and discomfort rather than extending life : 58%<br>Preference for Do Not Resuscitate order : 37%<br>"Very unwilling" or "Would rather die" than be attached to a ventilator "all the time" :                               |
| Dal Negro 2016   | Forced choice: inhaler            | Cross-sectional study       | 157 (47% of 333 patients had COPD, the rest had | Choice or proportion of choice                 | preference device C (the Respimat SMI): 47% COPD patients                                                                                                                                                                                                                      |
| Dales 1999       | Probability trade off             | Repeated surveys            | 20                                              | Choice or proportion of choice                 | Baseline Choice ventilation<br>Choice After Decision Aid-yes: 5 (71%), strength of preference for MV (mean): 0.89<br>Choice After Decision Aid-no: 2 (29%), strength of preference for MV (mean): 0.01<br>Baseline Choice no ventilation                                       |
| Dowson 2004      | ranking: treatment                | Cross-sectional survey      | 39                                              | Choice or proportion of choice                 | 1. Phone GP or after hours practice 2.6%<br>2. Take (extra) prednisone 0%                                                                                                                                                                                                      |
| Fox 1999         | Forced choice: treatment          | Cross-sectional survey      | 1016                                            | Choice or proportion of choice                 | preference for paliative care: 33.6%                                                                                                                                                                                                                                           |
| Fried 2002       | Probability trade off             | Cross-sectional survey      | 81                                              | Choice or proportion of choice                 | treatment preferences (proportion of wanting the treatment under certain circumstance)<br>SCENARIO<br>1 —LOW BURDEN. RESTORATION OF                                                                                                                                            |
| Fried 2007       | Probability trade off             | Repeated surveys            | 64                                              | Choice or proportion of choice                 | Willingness to Undergo High-Burden Therapy to Avoid Death: 32 (50%)<br>Willingness to Risk Physical Disability to Avoid Death: 41 (64%)<br>Willingness to Risk Cognitive Disability to Avoid Death: 44 (69%)                                                                   |

|               |                                          |                                         |                                       |                                           |                                                                                                                                                                                                                                                              |
|---------------|------------------------------------------|-----------------------------------------|---------------------------------------|-------------------------------------------|--------------------------------------------------------------------------------------------------------------------------------------------------------------------------------------------------------------------------------------------------------------|
| Gaber 2004    | Forced choice: treatment                 | Repeated surveys                        | 100                                   | Choice or proportion of choice            | Number of patients:<br>Patient's views towards "yes" CPR, IV and NIV: 48<br>Patient's views towards "yes" IV and NIV: 19<br>Patient's views towards "yes" IV: 10                                                                                             |
| Goossens 2014 | Willingness to pay, Conjoint analysis/Di | Cross-sectional survey                  | 107                                   | Choice or proportion of choice<br>Mean    | always usual hospital care: 29 (25%)<br>always early assisted discharge: 5 (46%)<br>Both: 33 (29%)<br>Willingness to pay                                                                                                                                     |
| Hanada 2015   | Forced choice: treatment                 | Repeated surveys                        | First survey: 57<br>Second survey: 39 | Choice or proportion of choice            | First survey Preference of Respimat or HandiHaler<br>Preferring Respimat: 45.6% (Respimat is much better 3.5%; Respimat is better: 42.1%);<br>Second survey Preference of Respimat or HandiHaler                                                             |
| Hansen 1990   | Forced choice: treatment                 | Randomized controlled trial             | 48                                    | Choice or proportion of choice            | Number of patients<br>Patients preferred turbutaline: 23<br>Patients preferred placebo: 9<br>Patients indicated not difference between treatments: 16                                                                                                        |
| Hansen 1994   | VAS, Forced choice: inhaler              | Trial, non-randomized or non-controlled | 25                                    | Median (Range)<br>Choice or proportion of | VAS<br>2 weeks after treatment: 67 (1-100) for turbuhaler and 48 (7-99) for pari-inhaler boy                                                                                                                                                                 |
| Haughney 2005 | Conjoint analysis/Discrete choice        | Cross-sectional survey (A fractional    | 125                                   | Mean                                      | Impact on everyday life<br>Little impact on activities, able to go for a short walk: 7.6;<br>Able to wash and dress and move around the house: 4.4;<br>Able to wash and dress, walking almost impossible : 3                                                 |
| Hohmeier 2016 | patient perception survey                | Cohort study                            | 12                                    | Choice or proportion of choice            | I would participate in a research study even if it was inconvenient for me but it concluded with an improvement in my COPD management and improvement in my overall health and quality of life<br>strongly agree: 4                                          |
| Hwang 2011    | Forced choice: treatment                 | Cross-sectional survey                  | 300                                   |                                           |                                                                                                                                                                                                                                                              |
| Janssen 2011b | Probability trade off                    | Cross-sectional survey                  |                                       | Choice or proportion of choice            | COPD patients preferring CPR: 70.50%<br>COPD patients preferring MV: 70.50%<br>Low-burden<br>likelihood of death 0%: 95.2%                                                                                                                                   |
| Janssen 2011c | Forced choice: treatment                 | Cross-sectional survey                  | Dutch patients: 122<br>US patients:   | Choice or proportion of choice            | Patients' preferences in their current health state for MV: 70.5% of Dutch population and 58.2% of US patients reported they would accept<br>Patients' preferences in their current health state for CPR: 69.7% of Dutch and 70.2% of US patients            |
| Jarvis 2007   | Forced choice: inhaler                   | Cross-sectional survey                  | 53                                    | Choice or proportion of choice            | Patients pMDI device difficult to use: 46%<br>Patients DPI use device difficult to use: 17%<br>Patients using a pMDI alone felt able to identify a "clinical benefit": 58%<br>Patients using a DPI alone felt able to identify a "clinical benefit": 33%     |
| Jordan 2014   | Forced choice: Preferences of            | Cross-sectional survey                  | 44                                    | Choice or proportion of choice            | Preference of information<br>What are all possible side effects of treatment: absolutely want 80 (80.8%); would like 16 (16.2%); do not want 3 (3%)<br>What effect can I expect from this treatment: absolutely want 85 (85.9%); would like 9                |
| Kawata 2014   | Willingness to pay, Conjoint analysis/Di | Cross-sectional survey                  | 515                                   | Mean (95% CI)                             | Utility score<br>Little or no relieve (complete relief as reference) : -1.23 (-1.33, -1.12)<br>some relieve (complete relief as reference) : -0.54 (-0.64, -0.43)<br>Feel medicine start to work within 20 min (within 5 min as reference) : -0.19 (-0.24, - |
| Lynn 2000     | Forced choice: treatment                 | Cohort study                            | 416 died among 1016 enrolled          | Choice or proportion of choice            | preference for Do-Not-Resuscitate (DNR)<br>29% of patients who were long-term survivors<br>43% of those who survived to leave the hospital but lived less than a year<br>42% of those who died during the first hospitalization                              |
| Mahler 2014   | Forced choice: treatment                 | Randomized controlled trial             | 20                                    | Choice or proportion of choice            | Preferences of treatment: Eight patients preferred salmeterol Diskus, seven patients preferred arformoterol solution, and five patients had no preference.                                                                                                   |
| Martínez 2012 | Forced choice: treatment                 | Cross-sectional survey                  | 568                                   | Choice or proportion of choice            | Males prefers dry-powdered inhalers: 62.30%<br>Females prefers dry-powdered inhalers: 54.60%<br>Males prefers metered dose inhalers: 57.5<br>Females prefers metered dose inhalers: 54.20%                                                                   |

|                   |                                     |                                         |                                         |                                                   |                                                                                                                                                                                                                                                                                                                                                       |
|-------------------|-------------------------------------|-----------------------------------------|-----------------------------------------|---------------------------------------------------|-------------------------------------------------------------------------------------------------------------------------------------------------------------------------------------------------------------------------------------------------------------------------------------------------------------------------------------------------------|
| McDowell 2015     | VAS, EQ-5D utility, forced choice:  | Randomized controlled trial             | 110                                     | Mean (SD), Mean (95% CI), choice or proportion of | Telemonitoring with usual care (EQ-5D scores at baseline) 0.49 (0.35)<br>Usual care (EQ-5D scores at baseline) 0.52 (0.30)<br>Telemonitoring with usual care (EQ-5D VAS scores at baseline) 50.1 (18.0)<br>Usual care (EQ-5D VAS scores at baseline) 45.5 (23.1)                                                                                      |
| McNamara 2015     | Forced choice: place of treatment   | Randomized controlled trial             | 53                                      | Choice or proportion of choice                    | 28 of the 53 participants (53%) indicated the pool as their preferred environment, 23/53 (43%) the gym and 2/53 (4%) reported no preference for either environment.<br>Of the 18 water-based exercise training participants, 16/18 (89%) indicated they would prefer to continue exercise training in the pool whilst 2/18 (11%) indicated they would |
| Molimard 2005     | Conjoint analysis/Discrete choice   | Cross-sectional survey                  | 245                                     | Mean<br>Choice or proportion of choice            | I am extremely satisfied with my main inhaler: 5.5<br>The three main inhaler attributes that the patients considered to be most important were ease of use/convenience, efficacy, and inhaler size which were given primary importance by 66%, 29%, and 27% patients, respectively.                                                                   |
| Moore 2004        | Forced choice: inhaler              | Cross-sectional survey                  | 256                                     | Choice or proportion of choice                    | Proportion of patients considering following attributes "very important"<br>Overall ease of using: 86%<br>Being quick to use when you need it: 84%<br>Ease of holding or gripping: 79%                                                                                                                                                                |
| Mutterlein 1990   | Forced choice: device               | Cross-over study                        | 60                                      |                                                   |                                                                                                                                                                                                                                                                                                                                                       |
| Norris 2005       | Forced choice: treatment            | Cross-sectional survey                  | 111                                     | Choice or proportion of choice                    | Current health (No ventilation): 39.60%<br>Current health (No CPR): 38.40%<br>Permanent coma (No ventilation): 93.60%<br>Permanent coma (No CPR): 91.00%                                                                                                                                                                                              |
| Ohno 2014         | Forced choice: treatment            | Trial, non-randomized or non-controlled | 28                                      | Choice or proportion of choice                    | continuation of Onbrez<br>Definitely want to continue: 2 (7.7%)<br>Want to continue: 14 (53.8%)<br>Equivocal: 10 (38.5%)                                                                                                                                                                                                                              |
| Ojoo 2002         | Forced choice: treatment            | Randomized controlled trial             | 61                                      | Choice or proportion of choice                    | treatment preferences<br>Sixteen of the 27 patients (59.3%) in the conventional arm and 26 of the 27 (96.3%) in the domiciliary arm would have preferred domiciliary management.<br>Thirty four carers completed the questionnaires and the respective carer preference                                                                               |
| Oliver 1997       | Ranking: treatment                  | Cross-over study                        | 20                                      |                                                   |                                                                                                                                                                                                                                                                                                                                                       |
| Pallin 2012       | Willingness to pay, Forced choice:  | Cross-sectional survey                  | 146 patient approached/142 completed    | Choice or proportion of choice                    | In making a decision to be screened, screening convenience is important<br>Former smoker: 64%<br>Current smoker: 71.4%<br>total: 66.9%                                                                                                                                                                                                                |
| Pascual 2015      | Forced choice: inhaler              | Cross-over study                        | 127                                     | Choice or proportion of choice, Mean (SE)         | Proportion of patients preferring Genuair to Breezhaler (after 2 weeks): 72.7% vs. 27.3%<br>Willingness to continue using each inhaler (Genuair vs. Breezhaler; on a scale of 0–100): 79.6 (2.60) vs. 63.6 (2.60)                                                                                                                                     |
| Pisa 2013         | Conjoint analysis/Discrete choice   | Cross-sectional survey                  | 300                                     | Choice or proportion of choice                    | Relative importance of the COPD attributes (%):<br>Total<br>Dyspnea: 36%<br>Performance capability (bodily resilience) due to COPD: 19%                                                                                                                                                                                                               |
| Price 2013b       | Forced choice: treatment            | Cohort study                            | 2138                                    | Choice or proportion of choice                    | agreement of preference for once-daily therapy<br>Strongly agree: 12%<br>Agree: 32.6%<br>Not sure: 24.9%                                                                                                                                                                                                                                              |
| Reinke 2011       | Forced choice: treatment            | Cross-sectional survey                  | 1292 invited but 376 meet the inclusion | Choice or proportion of choice                    | Preferences on CPR<br>Total: 266 (77.8%)<br>history of depression: 97 (75.2%)<br>no history of depression: 169 (79.3%)                                                                                                                                                                                                                                |
| Riley 2016        | Forced choice: inhaler              | Randomized controlled trial             | 618                                     | Choice or proportion of choice                    | In the attribute of<br>"the number of steps" preference for Ellipta™ DPI: 59%, HandiHaler®: 17%, no preferences: 24%<br>"time taken to use" preference for Ellipta™ DPI: 62%, HandiHaler®: 14%, no preference:                                                                                                                                        |
| Rinnenburger 2012 | Preferences of decision making mode | Repeated surveys                        | 84 (what was the 84% of whole)          | Choice or proportion of choice                    | Therapeutic or care choices affecting you may have to be made during the treatment (decisions about hospital admission, medical tests, therapies). Would you like to be involved in the decision making process, alongside doctors, or would you rather delegate decisions to others?                                                                 |

|                     |                                      |                                         |                                   |                                                             |                                                                                                                                                                                                                                                                                                                                                                                                                                                                                                                                                                                                                                                                                                                   |
|---------------------|--------------------------------------|-----------------------------------------|-----------------------------------|-------------------------------------------------------------|-------------------------------------------------------------------------------------------------------------------------------------------------------------------------------------------------------------------------------------------------------------------------------------------------------------------------------------------------------------------------------------------------------------------------------------------------------------------------------------------------------------------------------------------------------------------------------------------------------------------------------------------------------------------------------------------------------------------|
| Siler 2014          | Patient's expectation of treatment   | Randomized controlled trial             | 40                                | Least squares mean (SEM)                                    | Patient's expectation of treatment adherence<br>Indacaterol group: 2.1 (0.21) ; placebo 2.3 (0.21)                                                                                                                                                                                                                                                                                                                                                                                                                                                                                                                                                                                                                |
| Stapleton 2005      | Forced choice: treatment             | Cross-sectional survey                  | 101                               | Choice or proportion of choice                              | want mechanical ventilation: 62.20%<br>want CPR: 63.60%                                                                                                                                                                                                                                                                                                                                                                                                                                                                                                                                                                                                                                                           |
| Stavem 2002b        | Time trade off, Standard gamble.     | Cross-sectional survey                  |                                   | Median (95% CI, Range)<br>Median (95% CI)                   | SG 0.95 (0.88-0.97) range: 0.05-1<br>TTO 0.91 (0.70-0.93) range: 0.05-1<br>EQ-VAS 0.54 (0.50-0.65) range: 0.05-0.95<br>15D 0.80 (0.77-0.83) range: 0.54-1                                                                                                                                                                                                                                                                                                                                                                                                                                                                                                                                                         |
| Sutherland 2009     | Forced choice: device                | Randomized controlled trial             | 99/ 109                           | Choice or proportion of choice                              | for all participants: 40.3% for IPR-ALB MDI and 50% for FFIS Nebulizer, 9.9% no difference; for severe patients: 28.3% for IPR-ALB MDI and 63.0% for FFIS Nebulizer, 8.7% no difference                                                                                                                                                                                                                                                                                                                                                                                                                                                                                                                           |
| Svedsater 2013      | Forced choice: inhaler               | Cross-sectional survey                  | 42                                | Choice or proportion of choice                              | No (%) of patients expressing preference for the ELLIPTA DPI<br>For patients using DISKUS as comparator device: 18 (86%);<br>For patients using MDI/HFA as comparator device: 17 (85%);<br>For patients using HandiHaler as comparator device: 19 (95%).                                                                                                                                                                                                                                                                                                                                                                                                                                                          |
| Torrance 1999       | HUI, willingness to pay              | Randomized controlled trial             | 222 in 240                        | Mean (SD)<br>Median                                         | HUI<br>first AECB Ciprofloxacin: 0.72 (0.20), usual care: 0.68 (0.19)<br>At regular visit no.1 Ciprofloxacin: 0.78 (0.21), usual care: 0.77 (0.19)<br>At regular visit no.2 Ciprofloxacin: 0.80 (0.20), usual care: 0.78 (0.18)                                                                                                                                                                                                                                                                                                                                                                                                                                                                                   |
| Travaline 1995      | Forced choice: treatment             | Cross-sectional survey                  | 37                                | Choice or proportion of choice                              | decision to use MV<br>yes 15 (40%); no 8 (22%); unsure: 14 (38%)                                                                                                                                                                                                                                                                                                                                                                                                                                                                                                                                                                                                                                                  |
| Utens 2013          | Forced choice: place of treatment    | Randomized controlled trial             | 139                               | Choice or proportion of choice                              | Preference to be treated at home at T+4 days<br>25(42%) in the usual hospital treatment group and 56 (86%) in the early assisted group<br>Preference to be treated at home at T+90 days<br>17 (35%) in the usual hospital treatment group and 33 (59%) in the home treatment                                                                                                                                                                                                                                                                                                                                                                                                                                      |
| Utens 2014          | Forced choice: place of treatment    | Randomized controlled trial             | 124 (62 caregivers each in either | Choice or proportion of choice                              | Preference to be treated at home at the end of the 7-day treatment<br>15 (33.3%) of informal caregivers of patients allocated to usual hospital care and 37 (71.2%) of informal caregivers allocated to hospital-at-home<br>Preference to be treated at home at the end of the follow up                                                                                                                                                                                                                                                                                                                                                                                                                          |
| van der Palen 2013a | Forced choice: inhaler , willingness | Randomized controlled trial             | 129                               | Mean (SD)<br>Choice or proportion of choice                 | willingness to continue inhaler use (scale 0 = not willing to 100 = definitely willing)<br>84.0 (3.2) for Genuair and 62.5 (3.2) for HandiHaler<br>more patients preferred Genuair than HandiHaler (79.1 vs 20.9%: p < 0.0001)                                                                                                                                                                                                                                                                                                                                                                                                                                                                                    |
| van der Palen 2013b | Forced choice: inhaler , willingness | Randomized controlled trial             | 113, while 82 for COPD            | Choice or proportion of choice<br>Mean (SD)                 | COPD inhaler preference<br>52 (72.2%) for Diskus, 20 (27.8%) for Elpenhaler<br>willingness to continue inhaler use (scale 0 = not willing to 100 = definitely willing)                                                                                                                                                                                                                                                                                                                                                                                                                                                                                                                                            |
| van der Palen 2016  | Forced choice: inhaler               | Cross-over study                        | 567                               | Choice or proportion of choice                              | patients preferred the ELLIPTA inhaler overall compared with the comparator devices (Figure 2). The majority of patients also preferred the ELLIPTA inhaler for most individual criteria (number of steps for correct use, time taken to use, size of the device, dose counter, comfort of mouthpiece and ease of opening: Po0.001) with some exceptions<br>Overall, a significantly greater proportion of patients preferred Genuair (73.7%) than Accuhaler (26.3%) (p<0.0001), with similar proportions of patients preferring Genuair over Accuhaler for each of the device attributes assessed (all p<0.0001). The willingness of patients to continue using each device was greater for Genuair (78.6%) than |
| Vogelmeier 2016     | Forced choice: inhaler               | randomized controlled trial             | 933                               | Choice or proportion of choice                              | COPD Intubation not needed 53.9 (19.8)<br>COPD Intubation not needed 50 (40, 66)<br>COPD Intubation not needed 52.3 (32.5)<br>COPD Intubation not needed 62 (36, 74)                                                                                                                                                                                                                                                                                                                                                                                                                                                                                                                                              |
| Wildman 2009        | VAS, forced choice: treatment        | Cohort study                            | 752 COPD (832 in total)           | Mean (SD)<br>Median (IQR)<br>Choice or proportion of choice | COPD Intubation not needed 53.9 (19.8)<br>COPD Intubation not needed 50 (40, 66)<br>COPD Intubation not needed 52.3 (32.5)<br>COPD Intubation not needed 62 (36, 74)                                                                                                                                                                                                                                                                                                                                                                                                                                                                                                                                              |
| Wilson 2005         | Forced choice: treatment, importance | Trial, non-randomized or non-controlled | 33                                | Choice or proportion of choice<br>Median (IQR)              | MV choices after the decision aid<br>After reviewing the decision aid, 31 participants (94%) reported that they had reached a decision about whether they personally would accept or forego MV in the event of a serious exacerbation: only two individuals remained completely uncertain. Of those                                                                                                                                                                                                                                                                                                                                                                                                               |
| Wilson 2007         | Forced choice: device                | Randomized controlled trial             | 30                                | Ranking                                                     | Preference for Accuhaler<br>2 people ranked it as the first, 13 as the second, 8 as the third, and 7 as the fourth<br>Preference for Aerolizer<br>5 people ranked it as the first, 7 as the second, 13 as the third, and 5 as the fourth                                                                                                                                                                                                                                                                                                                                                                                                                                                                          |

|                   |                              |                     |     |                                      |                                                                                                                                                                                                                                                                                                                                    |
|-------------------|------------------------------|---------------------|-----|--------------------------------------|------------------------------------------------------------------------------------------------------------------------------------------------------------------------------------------------------------------------------------------------------------------------------------------------------------------------------------|
| Yun Kirby<br>2016 | Forced<br>choice:<br>inhaler | Cross-over<br>study | 287 | Choice or<br>proportion of<br>choice | Inhaler attribute 1: size of the numbers on the dose counter (primary endpoint) 193 patients (68%) preferred ELLIPTA; 57 individuals (20%) preferred DISKUS; 35 participants (12%) expressed no preferences between the treatment options.<br>Inhaler attribute 2: number of steps to take the COPD medication. 190 patients (67%) |
|-------------------|------------------------------|---------------------|-----|--------------------------------------|------------------------------------------------------------------------------------------------------------------------------------------------------------------------------------------------------------------------------------------------------------------------------------------------------------------------------------|
